# Supplementary material for: Controlled reduction of isocyanates to formamides using monomeric magnesium
Source: Royal Society of Chemistry journal article supplement (doi:10.1039/d3cc00036b), 2023-01-01
Supplement: d3cc00036b1.pdf [file d3cc00036b1.pdf]

**Supplementary Information**  
*for*  
**Controlled reduction of isocyanates to formamides using monomeric  
magnesium**

Rohit Kumar,<sup>ab</sup> Vishal Sharma,<sup>ab</sup> Subhrashis Banerjee,<sup>bc</sup> Kumar Vanka,<sup>bc</sup> and Sakya S. Sen<sup>\*ab</sup>

**Contents:**

|                                                                                                                  |    |
|------------------------------------------------------------------------------------------------------------------|----|
| ❖ <b>General experimental information:</b> .....                                                                 | 1  |
| ❖ <b>General catalytic procedure for the synthesis of N-boryl formamide:</b> .....                               | 2  |
| ❖ <b>Table S1. Isocyanate substrate scope for N-boryl formamide:</b> .....                                       | 2  |
| ❖ <b>Analytical data of N-boryl formamide of corresponding isocyanates with their NMR spectra:</b> .             | 4  |
| ❖ <b>List of unsuccessful substrates for catalytic hydroboration:</b> .....                                      | 28 |
| ❖ <b>Competitive experiment for alkene/alkyne/nitrile/ketone/ester hydroboration- a selectivity study:</b> ..... | 29 |
| ❖ <b>Mechanistic investigation:</b> .....                                                                        | 31 |
| ❖ <b>Details of the theoretical calculations:</b> .....                                                          | 35 |
| ❖ <b>References:</b> .....                                                                                       | 39 |
| ❖ <b>The XYZ coordinates of the optimized structures discussed in the manuscript</b> .....                       | 40 |
| <br>                                                                                                             |    |
| ❖ <b>General experimental information:</b>                                                                       |    |

All reactions were carried out under argon atmosphere using Schlenk techniques or inside a MBraun glove box. Catalysts **1** was prepared according to our previous paper.<sup>S1</sup>

Pinacolborane (HBpin), isocyanates were purchased from Sigma-Aldrich, TCI Chemicals and used without further purification. C<sub>6</sub>D<sub>6</sub>, toluene-d<sub>8</sub>, CD<sub>3</sub>CN and CDCl<sub>3</sub> were purchased from Sigma-Aldrich, were degassed by three freeze-pump-thaw cycles and stored over molecular sieves.

<sup>1</sup>H, <sup>13</sup>C{<sup>1</sup>H} and <sup>11</sup>B NMR spectra were recorded on Bruker AV-200 MHz, AV-400 MHz and

AV-500 MHz and referenced to the resonances of the internal standard with respect to the solvent used. HRMS spectra were obtained using Thermo scientific Q-Exactive instrument.

❖ **General catalytic procedure for the synthesis of N-boryl formamide:**

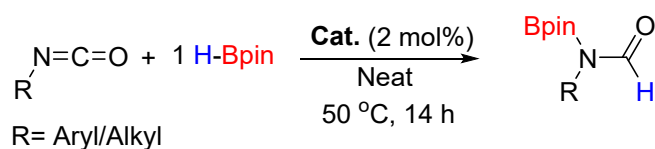

Scheme S1. General catalytic procedure for the synthesis of N-borylated formamide from phenyl isocyanate.

Ethyl isocyanate (0.250 mmol), pinacolborane (1.1 equiv., 0.275 mmol), catalyst (**1**, 2.0 mol%) were charged in a Schlenk tube/ nmr tube inside the glove box. The reaction mixture was allowed to heat at 50 °C for 14 h. Upon completion of the reaction, the volatiles were removed using vacuum in a Schlenk line and mesitylene (0.25 mmol) was added as the internal standard, while making the NMR in appropriate deuterated solvent. The progress of the reaction was monitored by the <sup>1</sup>H NMR spectroscopy, which indicated the completion of the reaction by the appearance of a new formamide -NCHO resonance.

❖ **Table S1. Isocyanate substrate scope for N-boryl formamide:**

| Entry | Substrate                                                                                 | Temperature (°C) | Time (h) | Catalyst <b>1</b> (mol%) | NMR Yield (%) | Product   | Selectivity (Formamide: dihydroborated:amine) |
|-------|-------------------------------------------------------------------------------------------|------------------|----------|--------------------------|---------------|-----------|-----------------------------------------------|
| 1.    | 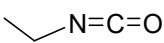 N=C=O | 50               | 14       | 2                        | 93            | <b>2a</b> | 100:0:0                                       |

|     |                                                                                     |    |    |   |    |           |         |
|-----|-------------------------------------------------------------------------------------|----|----|---|----|-----------|---------|
| 2.  | 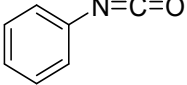   | 50 | 14 | 2 | 20 | <b>2b</b> | 20:0:15 |
| 3.  |    | 50 | 14 | 2 | 58 | <b>2c</b> | 100:0:0 |
| 4.  |    | 50 | 14 | 2 | 55 | <b>2d</b> | 100:0:0 |
| 5.  |    | 50 | 14 | 2 | 30 | <b>2e</b> | 100:0:0 |
| 6.  |    | 50 | 14 | 2 | 41 | <b>2f</b> | 41:8:7  |
| 7.  |    | 50 | 14 | 2 | 69 | <b>2g</b> | 100:0:0 |
| 8.  |  | 50 | 14 | 2 | 43 | <b>2h</b> | 100:0:0 |
| 9.  |  | 50 | 14 | 2 | 62 | <b>2i</b> | 100:0:0 |
| 10. |  | 50 | 14 | 2 | 26 | <b>2j</b> | 26:24:0 |
| 11. |  | 50 | 14 | 2 | 52 | <b>2k</b> | 100:0:0 |
| 12. |  | 50 | 14 | 2 | 56 | <b>2l</b> | 100:0:0 |

|     |                                                                                   |    |    |   |    |           |         |
|-----|-----------------------------------------------------------------------------------|----|----|---|----|-----------|---------|
| 13. | 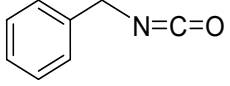 | 50 | 14 | 2 | 59 | <b>2m</b> | 59:18:0 |
| 14. |  | 50 | 14 | 2 | 70 | <b>2n</b> | 100:0:0 |
| 15. |  | 50 | 14 | 2 | 59 | <b>2o</b> | 100:0:0 |
| 16. |  | 50 | 14 | 2 | 53 | <b>2p</b> | 100:0:0 |

❖ Analytical data of N-boryl formamide of corresponding isocyanates with their NMR spectra:

**N-ethyl-N-(4,4,5,5-tetramethyl-1,3,2-dioxaborolan-2-yl)formamide (2a):**  $^1\text{H}$  NMR (400 MHz,

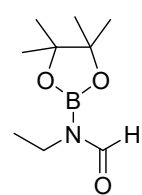

CHLOROFORM-*d*)  $\delta$  8.66 (s, 1H, NCHO), 3.34-3.30 (t, 2H, NCH<sub>2</sub>CH<sub>3</sub>), 1.52-1.47 (q, 3H, NCH<sub>2</sub>CH<sub>3</sub>), 1.30 (s, 12H, CH<sub>3</sub>) ppm;  $^{13}\text{C}\{^1\text{H}\}$  NMR (CDCl<sub>3</sub>, 101 MHz, 298 K):  $\delta$  165.92 (s, 1 C), 84.01 (s, 1 C), 39.93 (s, 1 C), 29.51 (s, 1 C), 26.53 (s, 1 C), 24.79 (s, 1 C), 24.46 (s, 1 C), 24.41 (s, 1 C) ppm.

The spectroscopic data is consistent with the literature data.<sup>S2</sup>

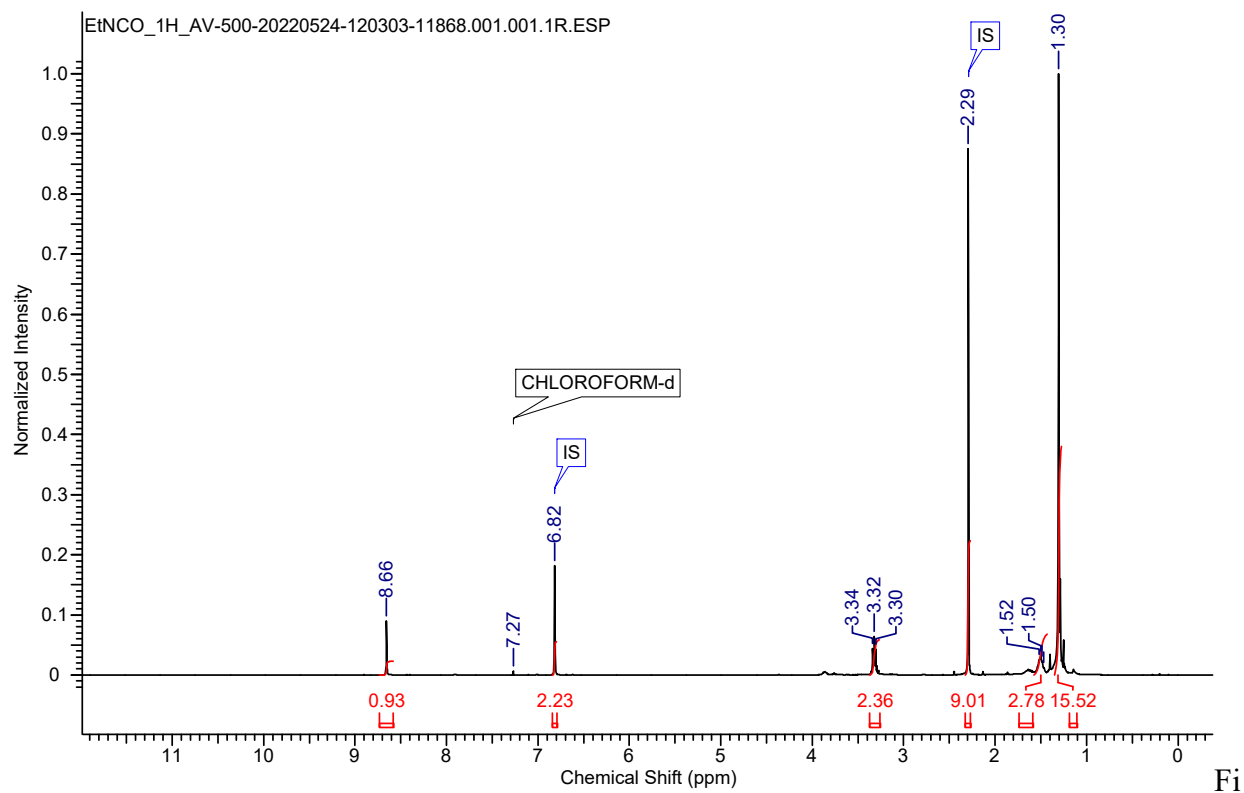

Figure S1.  $^1\text{H}$  NMR spectrum of **2a** ( $\text{CDCl}_3$ , 500 MHz, 298 K).

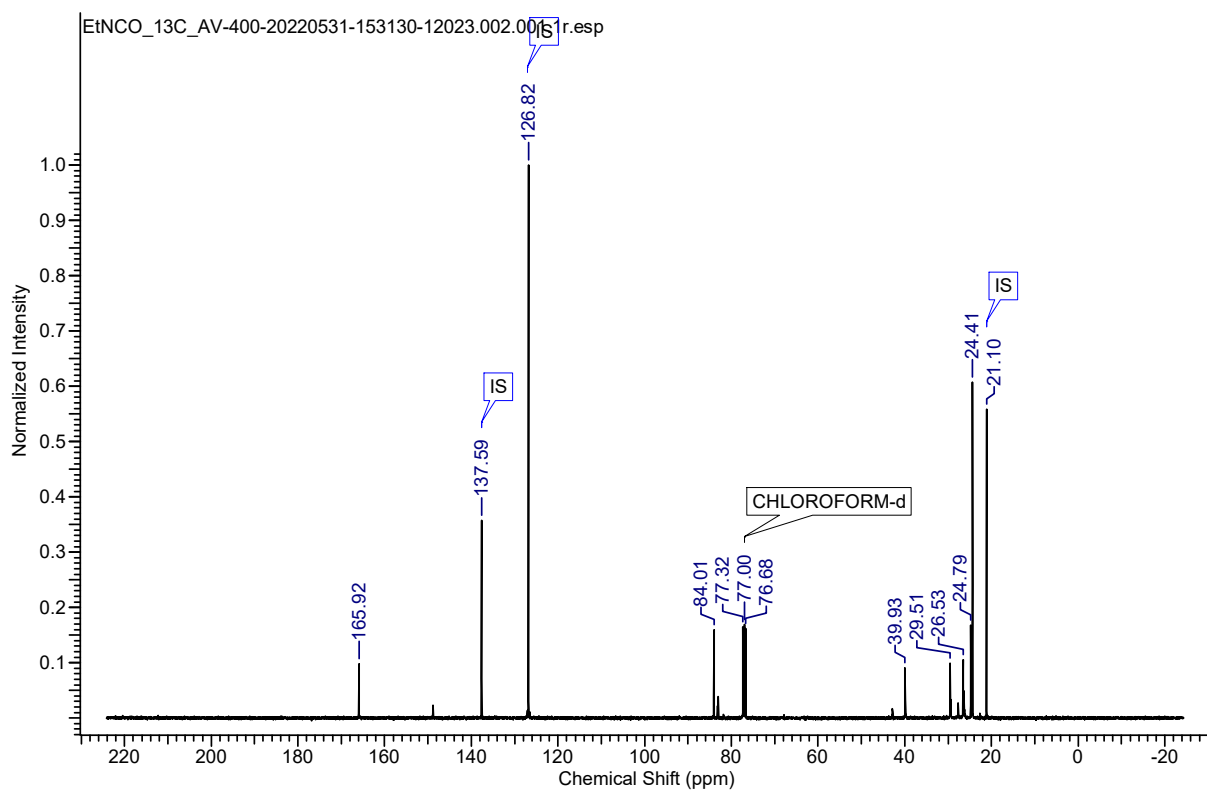

Figure S2.  $^{13}\text{C}$  NMR spectrum of **2a** ( $\text{CDCl}_3$ , 101 MHz, 298 K).

**N-phenyl-N-(4,4,5,5-tetramethyl-1,3,2-dioxaborolan-2-yl)formamide (2b):**  $^1\text{H}$  NMR (400

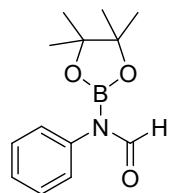

MHz, CHLOROFORM-*d*)  $\delta$  8.71 (s, 1 H, NCHO), 7.29-7.20 (m, 5H, PhH), 2.87 (s, 3H, NCH<sub>3</sub>), 1.08 (s, 12H) ppm;  $^{13}\text{C}\{^1\text{H}\}$  NMR (CDCl<sub>3</sub>, 101 MHz, 298 K):  $\delta$  165.31 (s, 1 C), 148.58 (s, 1 C), 147.40 (s, 1 C), 133.58 (s, 1 C), 129.20 (s, 1 C), 128.84 (s, 1 C), 128.69 (s, 1 C), 128.40 (s, 1 C), 128.34 (s, 1 C), 128.24 (s, 1 C), 127.27 (s, 1 C), 127.05 (s, 1 C), 126.97 (s, 1 C), 120.51 (s, 1 C), 119.68 (s, 1 C), 118.74 (s, 1 C), 84.43 (s, 1 C), 82.98 (s, 1 C), 82.57 (s, 1 C), 81.78 (s, 1 C), 34.19 (s, 1 C), 24.55 (s, 1 C), 24.42 (s, 1 C), 24.34 (s, 1 C), 24.09 (s, 1 C), 22.60 (s, 1 C) ppm.

The spectroscopic data is consistent with the literature data.<sup>S2</sup>

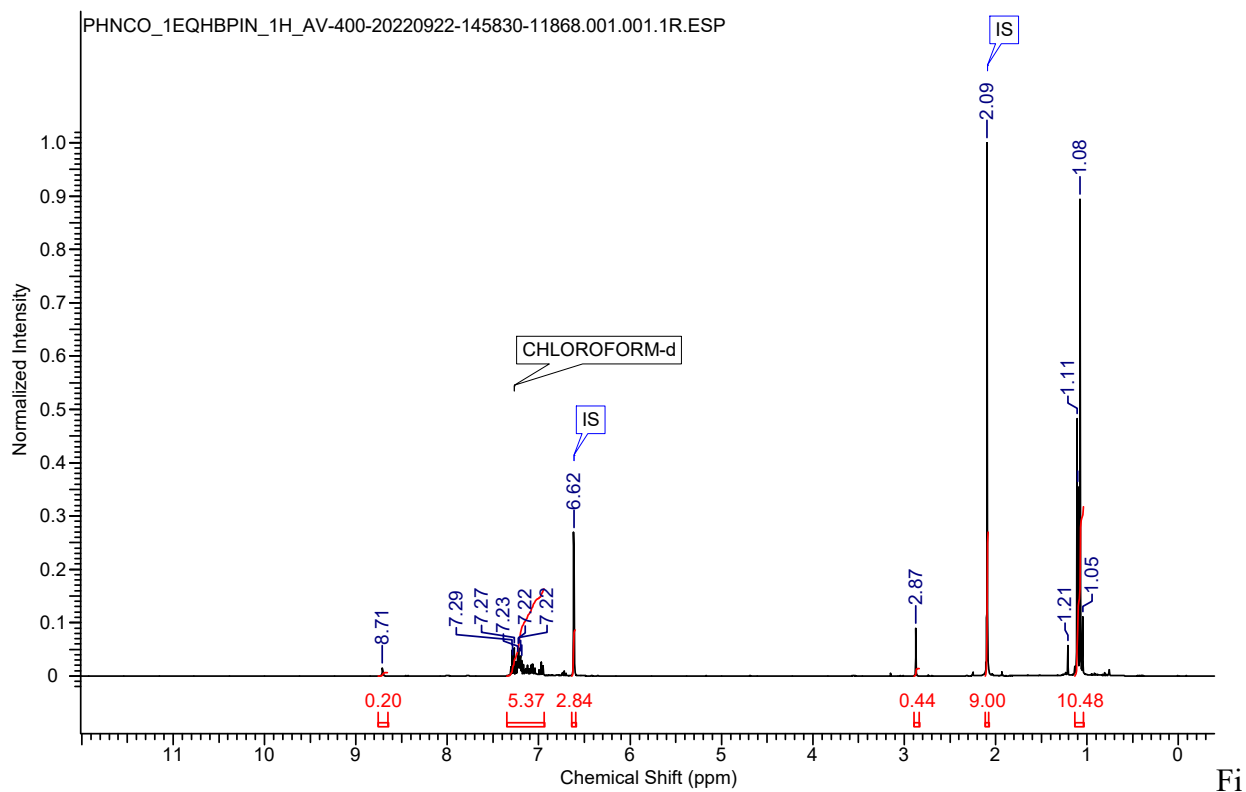

Figure S3.  $^1\text{H}$  NMR spectrum of **2b** (CDCl<sub>3</sub>, 400 MHz, 298 K).

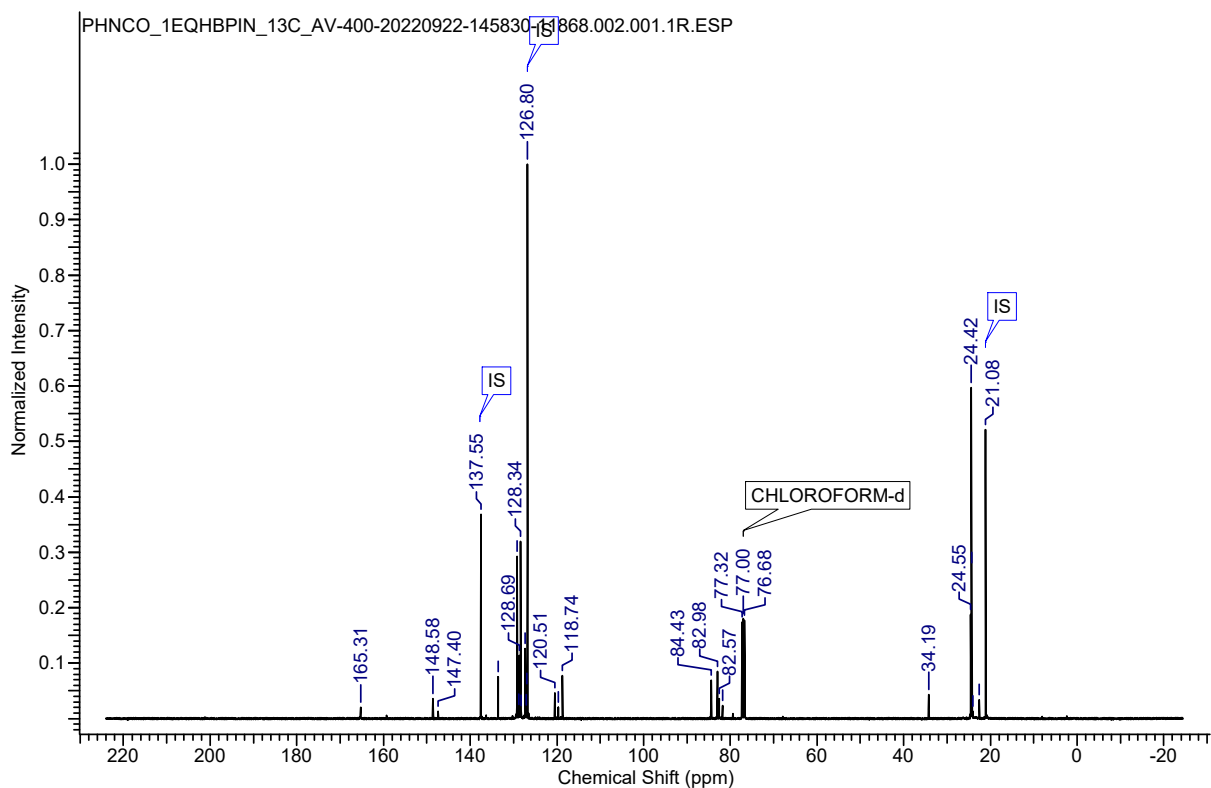

Figure S4.  $^{13}\text{C}$  NMR spectrum of **2b** ( $\text{CDCl}_3$ , 101 MHz, 298 K).

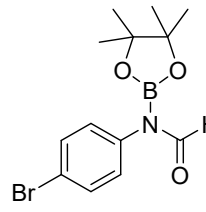
**N-(4-bromophenyl)-N-(4,4,5,5-tetramethyl-1,3,2-dioxaborolan-2-yl)formamide (2c):**  $^1\text{H}$  NMR ( $\text{CDCl}_3$ , 400 MHz, 298 K):  $\delta$  8.89 (s, 1H, NCHO), 7.53-7.51 (d, 2H, PhH), 7.08-7.06 (d, 2H, PhH), 1.34 (s, 12H,  $\text{CH}_3$ ) ppm;  $^{13}\text{C}\{^1\text{H}\}$  NMR ( $\text{CDCl}_3$ , 50.28 MHz, 298 K):  $\delta$  165.05 (s, 1 C), 132.51 (s, 1 C), 131.86 (s, 1 C), 131.69 (s, 1 C), 130.03 (s, 1 C), 128.97 (s, 1 C), 120.67 (s, 1 C), 120.32 (s, 1 C), 84.70 (s, 1 C), 83.04 (s, 1 C), 24.56 (s, 1 C), 24.44 (s, 1 C), 24.39 (s, 1 C) ppm.

The spectroscopic data is consistent with the literature data.<sup>S2</sup>

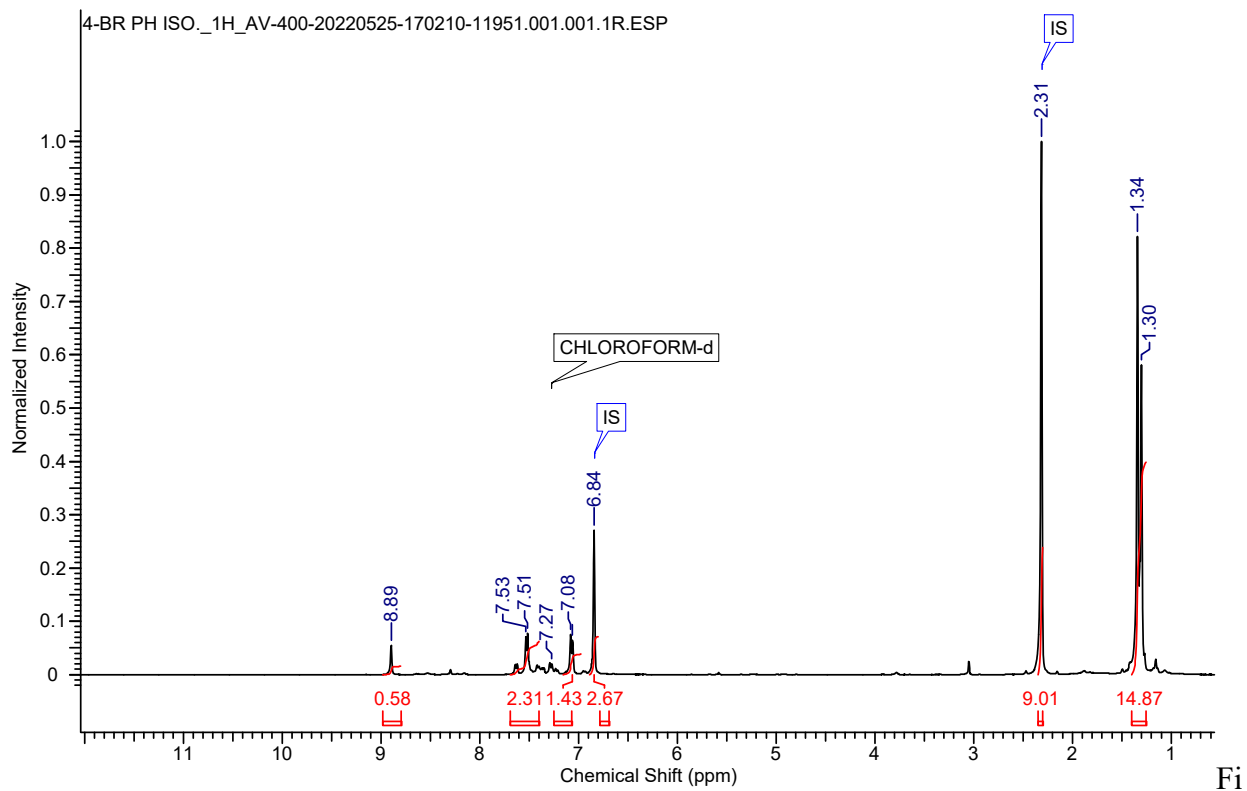

Figure S5.  $^1\text{H}$  NMR spectrum of **2c** ( $\text{CDCl}_3$ , 400 MHz, 298 K).

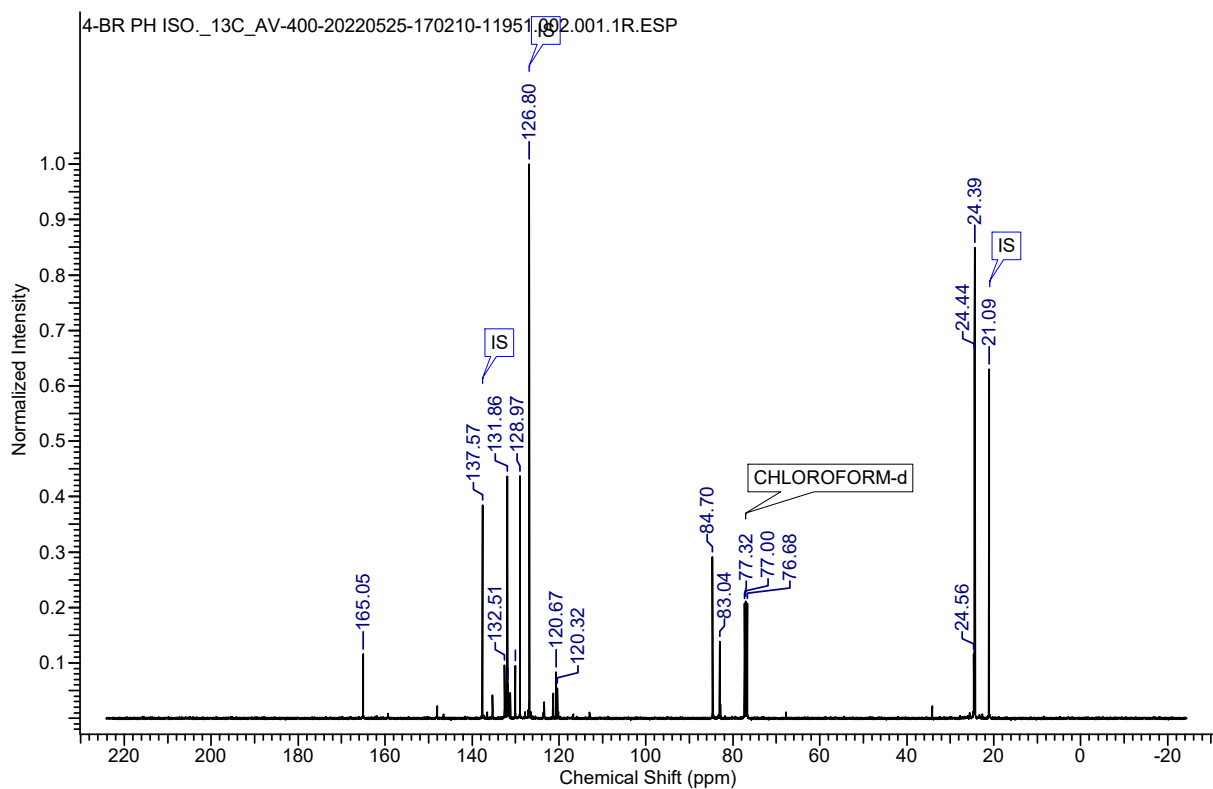

Figure S6.  $^{13}\text{C}$  NMR spectrum of **2c** ( $\text{CDCl}_3$ , 101 MHz, 298 K).



**N-(4-chlorophenyl)-N-(4,4,5,5-tetramethyl-1,3,2-dioxaborolan-2-yl)formamide (2d):**  $^1\text{H}$

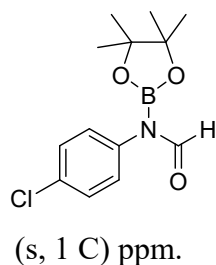

NMR ( $\text{CDCl}_3$ , 200 MHz, 298 K):  $\delta$  8.84 (s, 1H,  $\text{NCHO}$ ), 7.33-7.30 (d, 2H,  $\text{PhH}$ ), 7.08-7.06 (d, 2H,  $\text{PhH}$ ), 1.29 (s, 12H,  $\text{CH}_3$ ) ppm;  $^{13}\text{C}\{^1\text{H}\}$  NMR ( $\text{CDCl}_3$ , 101 MHz, 298 K):  $\delta$  165.10 (s, 1 C), 129.72 (s, 1 C), 129.51 (s, 1 C), 128.88 (s, 1 C), 128.60 (s, 1 C), 84.67 (s, 1 C), 83.01 (s, 1 C), 24.44 (s, 1 C), 24.37 (s, 1 C), 24.28 (s, 1 C) ppm.

The spectroscopic data is consistent with the literature data.<sup>S2</sup>

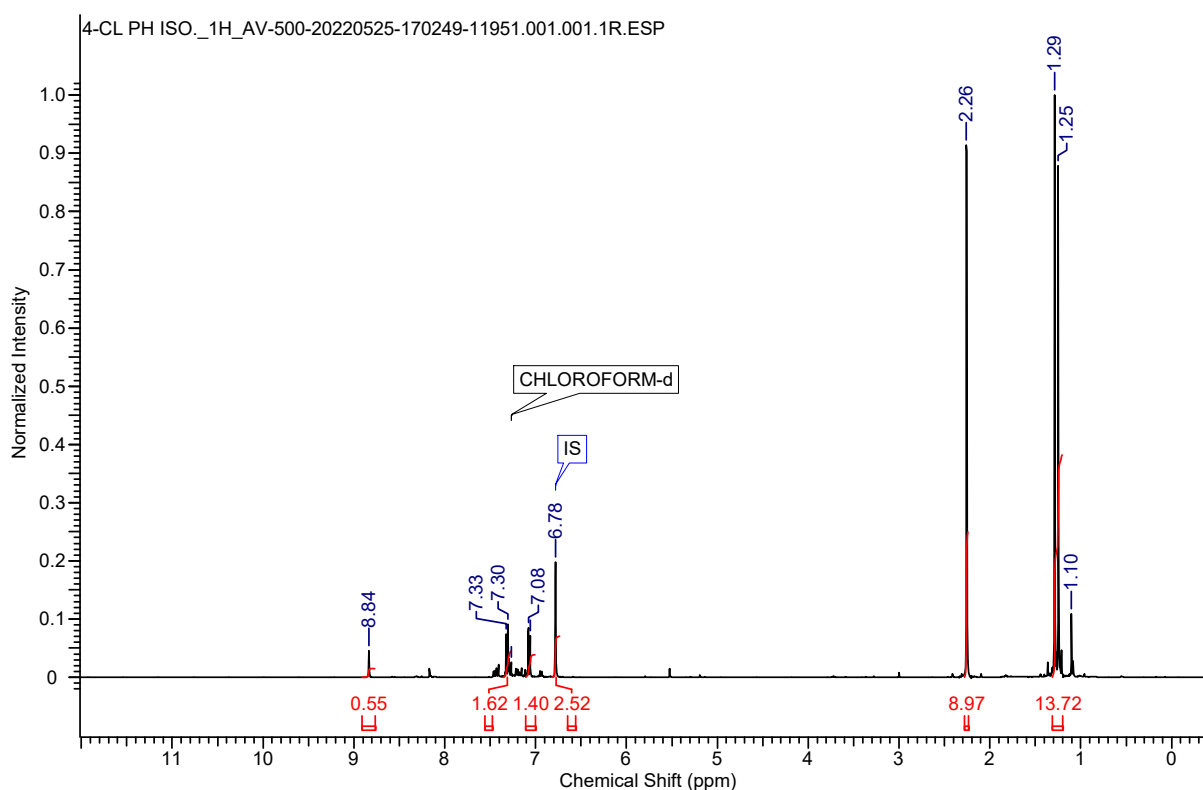

Figure S7.  $^1\text{H}$  NMR spectrum of **2d** ( $\text{CDCl}_3$ , 500 MHz, 298 K).

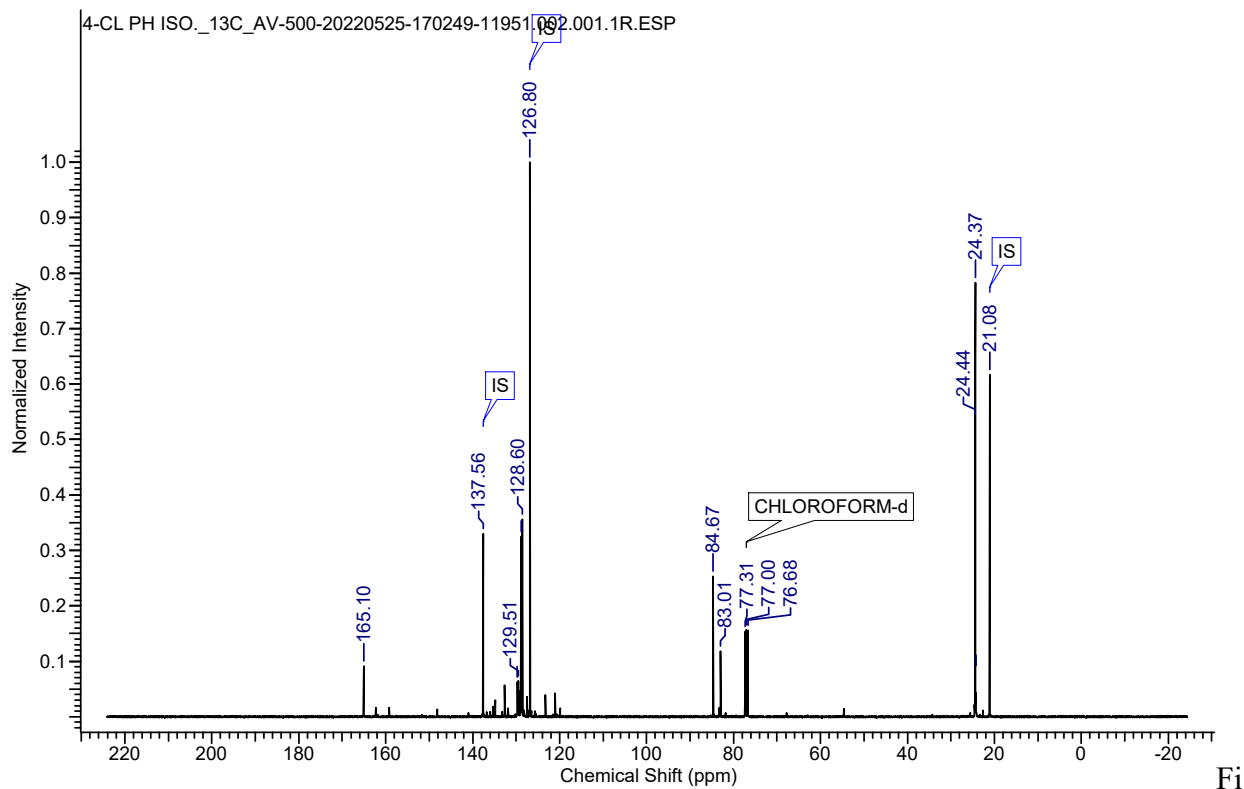

Figure S8.  $^{13}\text{C}$  NMR spectrum of **2d** ( $\text{CDCl}_3$ , 101 MHz, 298 K).

**N-(2,4-dichlorophenyl)-N-(4,4,5,5-tetramethyl-1,3,2-dioxaborolan-2-yl)formamide (2e):**  $^1\text{H}$

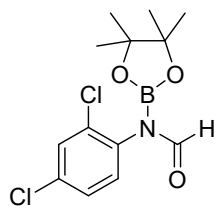

NMR ( $\text{CDCl}_3$ , 200 MHz, 298 K):  $\delta$  8.91 (s, 1H,  $\text{NCHO}$ ), 7.53-7.32 (m, 3H,  $\text{PhH}$ ), 1.37 (s, 12H,  $\text{CH}_3$ ) ppm;  $^{13}\text{C}\{^1\text{H}\}$  NMR ( $\text{CDCl}_3$ , 101 MHz, 298 K):  $\delta$  165.10 (s, 1 C), 129.72 (s, 1 C), 129.51 (s, 1 C), 128.88 (s, 1 C), 128.60 (s, 1 C), 84.67 (s, 1 C), 83.01 (s, 1 C), 24.44 (s, 1 C), 24.37 (s, 1 C), 24.28 (s, 1 C) ppm.

The spectroscopic data is consistent with the literature data.<sup>S2</sup>

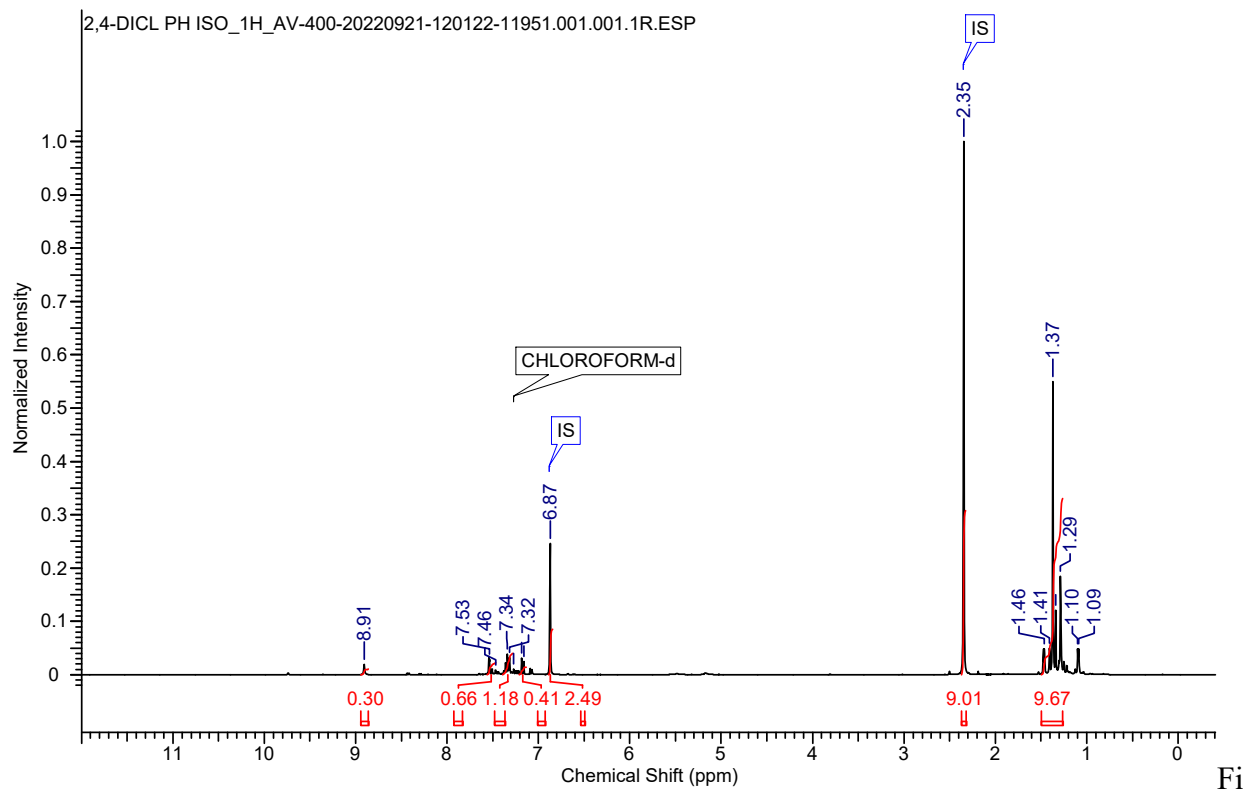

Figure S9.  $^1\text{H}$  NMR spectrum of **2e** ( $\text{CDCl}_3$ , 400 MHz, 298 K).

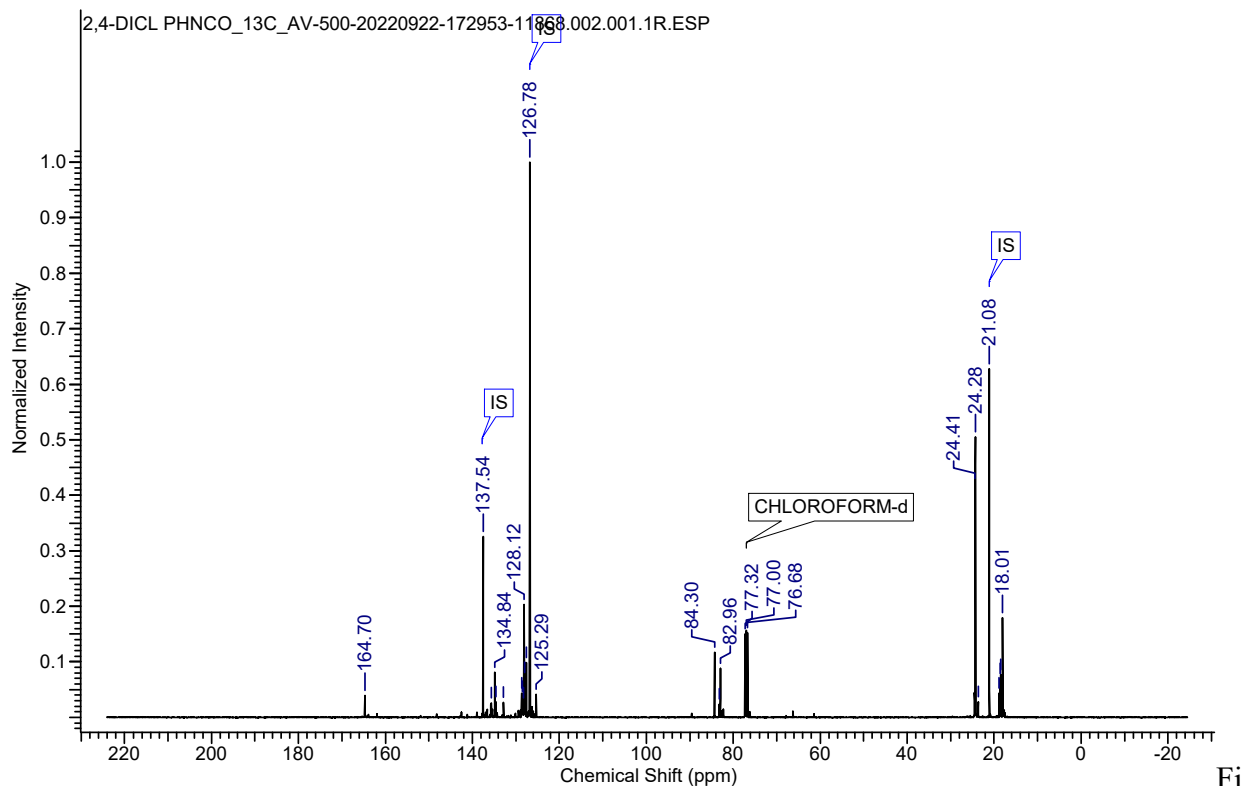

Figure S10.  $^{13}\text{C}$  NMR spectrum of **2e** ( $\text{CDCl}_3$ , 101 MHz, 298 K).

**N-(4-cyanophenyl)-N-(4,4,5,5-tetramethyl-1,3,2-dioxaborolan-2-yl)formamide (2f):**  $^1\text{H}$  NMR ( $\text{CDCl}_3$ , 500 MHz, 298 K):  $\delta$  8.74 (s, 1H, NCHO), 7.52-7.50 (d, 2H, PhH), 7.18-7.16 (d, 2H, PhH), 5.57 (s, 2H,  $\text{NCH}_2\text{-OBpin}$ ), 2.92 (s, 3H,  $\text{NCH}_3$ ), 1.13 (s, 12H,  $\text{CH}_3$ ) ppm;  $^{13}\text{C}\{^1\text{H}\}$  NMR ( $\text{CDCl}_3$ , 101 MHz, 298 K):  $\delta$  164.54 (s, 1 C), 140.55 (s, 1 C), 128.05 (s, 1 C), 125.56 (s, 1 C), 120.95 (s, 1 C), 119.65 (s, 1 C), 118.32 (s, 1 C), 117.98 (s, 1 C), 110.51 (s, 1 C), 84.95 (s, 1 C), 83.93 (s, 1 C), 83.29 (s, 1 C), 82.98 (s, 1 C), 24.50 (s, 1 C), 24.38 (s, 1 C), 24.34 (s, 1 C) ppm.

The spectroscopic data is consistent with the literature data.<sup>S2</sup>



Figure S12.  $^{13}\text{C}$  NMR spectrum of **2f** ( $\text{CDCl}_3$ , 101 MHz, 298 K).

**N-(4,4,5,5-tetramethyl-1,3,2-dioxaborolan-2-yl)-N-(o-tolyl)formamide (2g):**  $^1\text{H}$  NMR ( $\text{CDCl}_3$ , 400 MHz, 298 K):  $\delta$  8.96 (s, 1H,  $\text{NCHO}$ ), 7.31-7.28 (m, 3H,  $\text{PhH}$ ), 7.08-7.06 (m, 1H,  $\text{PhH}$ ), 2.24 (s, 3H,  $\text{NCH}_3$ ), 1.35 (s, 12H,  $\text{CH}_3$ ) ppm;  $^{13}\text{C}\{^1\text{H}\}$  NMR ( $\text{CDCl}_3$ , 101 MHz, 298 K):  $\delta$  165.01 (s, 1 C), 134.90 (s, 1 C), 130.61 (s, 1 C), 128.12 (s, 1 C), 127.74 (s, 1 C), 126.52 (s, 1 C), 84.35 (s, 1 C), 82.99 (s, 1 C), 24.41 (s, 1 C), 24.25 (s, 1 C), 17.72 (s, 1 C) ppm.

The spectroscopic data is consistent with the literature data.<sup>S2</sup>

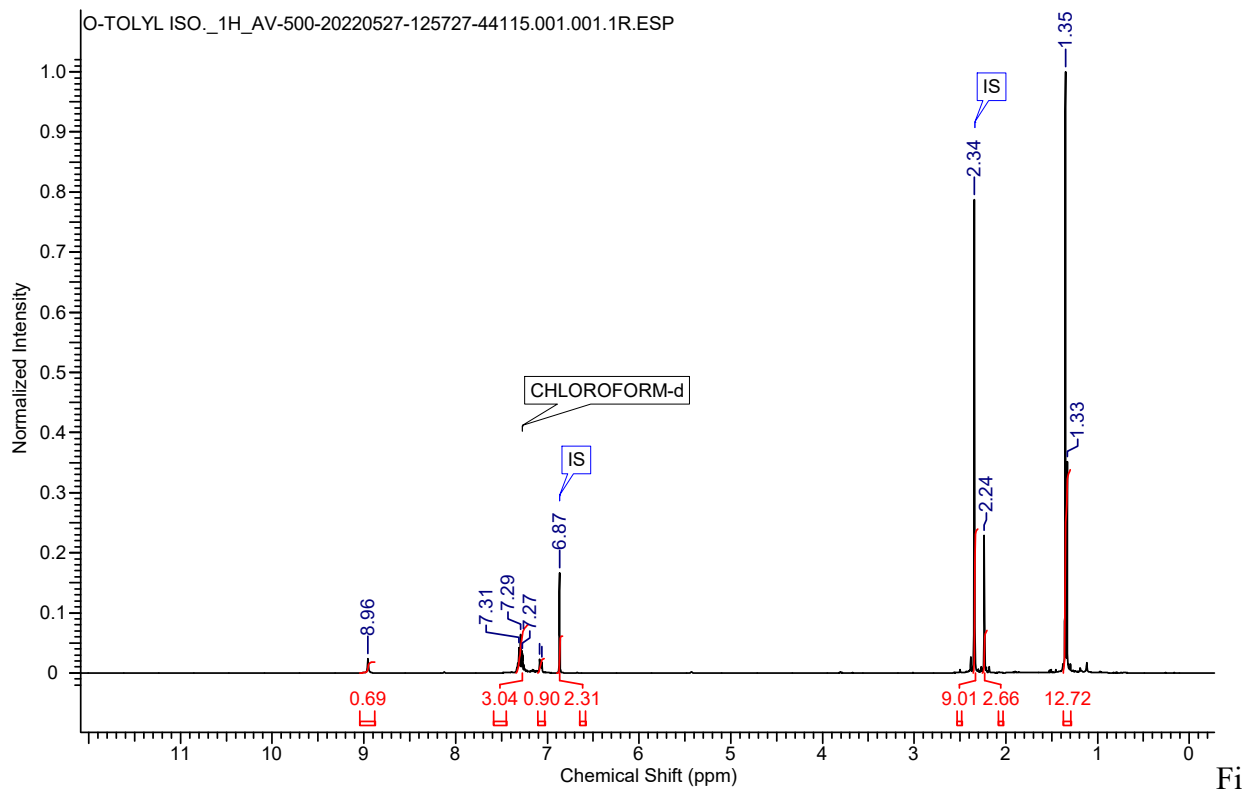

Figure S13.  $^1\text{H}$  NMR spectrum of **2g** ( $\text{CDCl}_3$ , 500 MHz, 298 K).

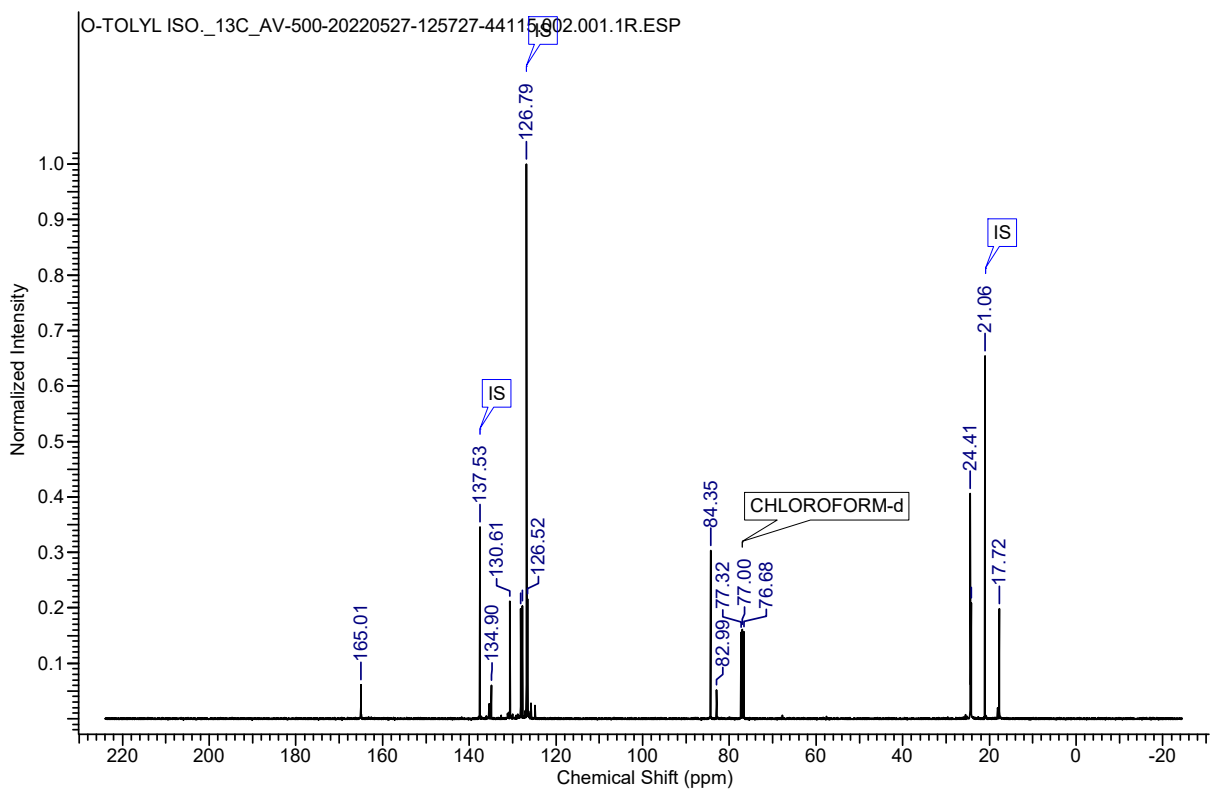

Figure S14.  $^{13}\text{C}$  NMR spectrum of **2g** ( $\text{CDCl}_3$ , 101 MHz, 298 K).

**N-(2,6-dimethylphenyl)-N-(4,4,5,5-tetramethyl-1,3,2-dioxaborolan-2-yl)formamide (2h):**  $^1\text{H}$

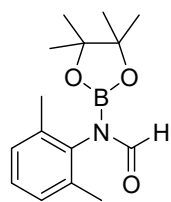

NMR ( $\text{CDCl}_3$ , 500 MHz, 298 K):  $\delta$  8.99 (s, 1H, NCHO), 7.20-7.07 (m, 3H, PhH), 2.41 (s, 3H, PhCH<sub>3</sub>), 2.23 (s, 3H, PhCH<sub>3</sub>), 1.37 (s, 12H, CH<sub>3</sub>) ppm;  $^{13}\text{C}\{^1\text{H}\}$  NMR ( $\text{CDCl}_3$ , 101 MHz, 298 K):  $\delta$  164.70 (s, 1 C), 134.84 (s, 1 C), 128.12 (s, 1 C), 127.94 (s, 1 C), 127.59 (s, 1 C), 84.30 (s, 1 C), 82.96 (s, 1 C), 24.41 (s, 1 C), 24.28 (s, 1 C), 18.59 (s, 1 C), 18.41 (s, 1 C), 18.01 (s, 1 C) ppm.

The spectroscopic data is consistent with the literature data.<sup>S2</sup>

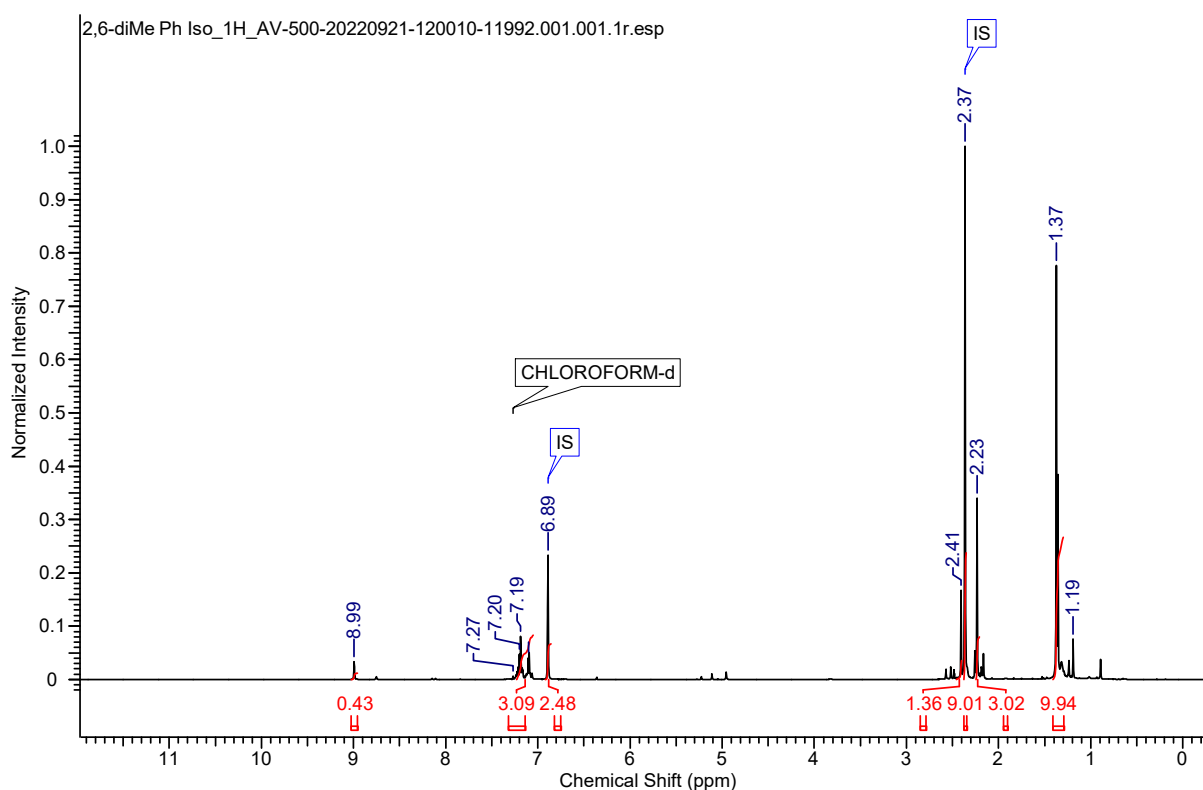

Figure S15.  $^1\text{H}$  NMR spectrum of **2h** ( $\text{CDCl}_3$ , 500 MHz, 298 K).



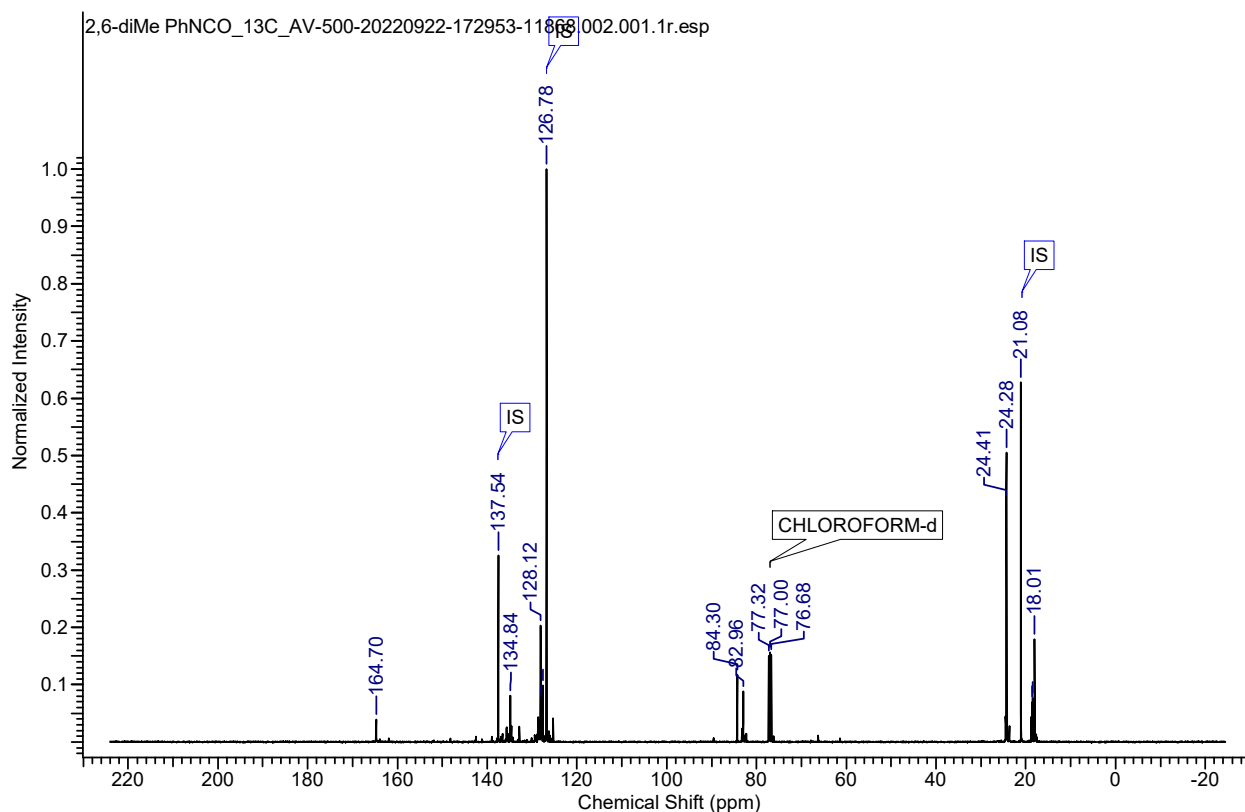

Figure S16.  $^{13}\text{C}$  NMR spectrum of **2h** ( $\text{CDCl}_3$ , 101 MHz, 298 K).

**N-(4-butylphenyl)-N-(4,4,5,5-tetramethyl-1,3,2-dioxaborolan-2-yl)formamide (2i):**  $^1\text{H}$  NMR

( $\text{CDCl}_3$ , 100 MHz, 298 K):  $\delta$  ppm 8.88 (s, 1H,  $\text{NCHO}$ ), 7.19-7.17 (d, 2H,  $\text{PhH}$ ), 7.05-7.03 (d, 2H,  $\text{PhH}$ ), 2.62-2.58 (t, 2H,  $\text{Bu}$ ), 1.62-1.59 (t, 2H,  $\text{Bu}$ ), 1.39-1.35 (t, 2H,  $\text{Bu}$ ), 1.30 (s, 12H,  $\text{CH}_3$ ), 0.95-0.92 (t, 3H,  $\text{Bu}$ ) ppm;  $^{13}\text{C}\{^1\text{H}\}$  NMR ( $\text{CDCl}_3$ , 101 MHz, 298 K):  $\delta$  165.48 (s, 1 C), 141.51 (s, 1 C), 128.67 (s, 1 C), 126.90 (s, 1 C), 84.36 (s, 1 C), 82.98 (s, 1 C), 35.16 (s, 1 C), 33.28 (s, 1 C), 24.54 (s, 1 C), 24.41 (s, 1 C), 24.34 (s, 1 C), 22.34 (s, 1 C), 13.83 (s, 1 C) ppm.

The spectroscopic data is consistent with the literature data. <sup>S2</sup>

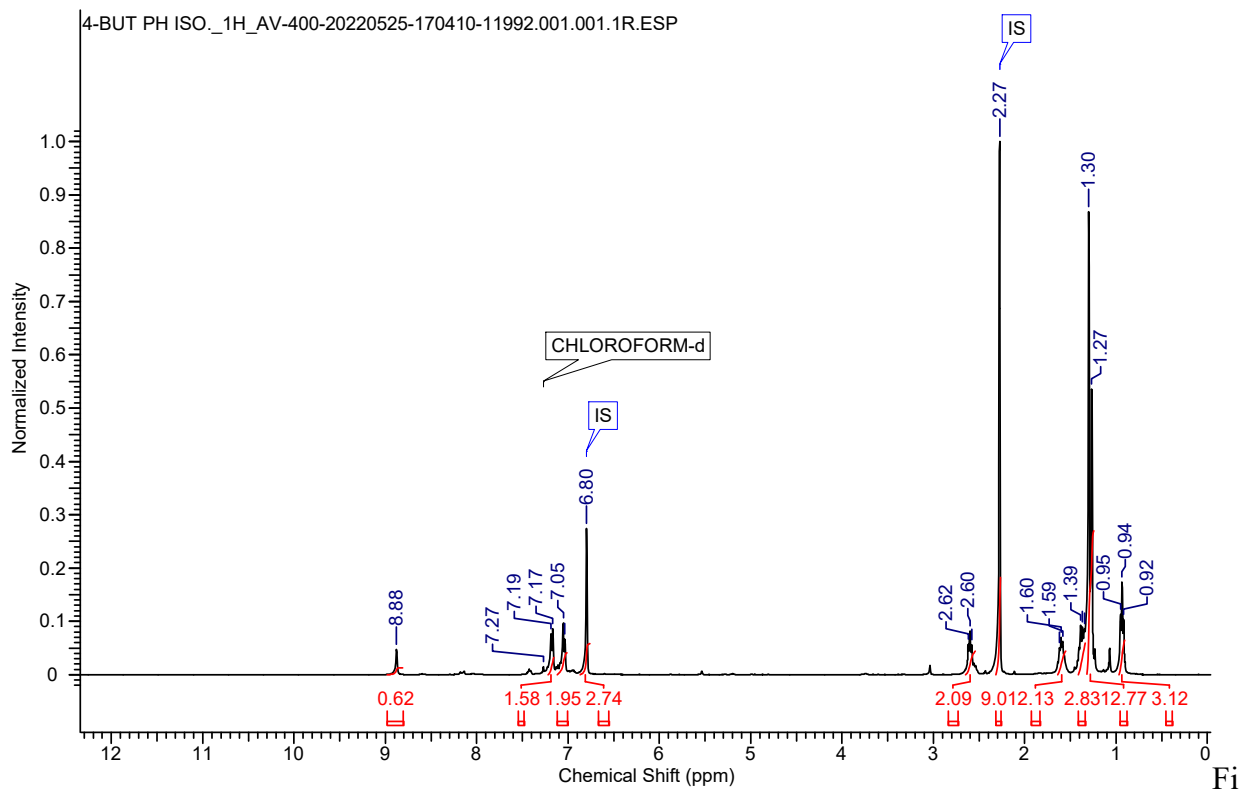

Figure S17.  $^1\text{H}$  NMR spectrum of **2i** ( $\text{CDCl}_3$ , 400 MHz, 298 K).

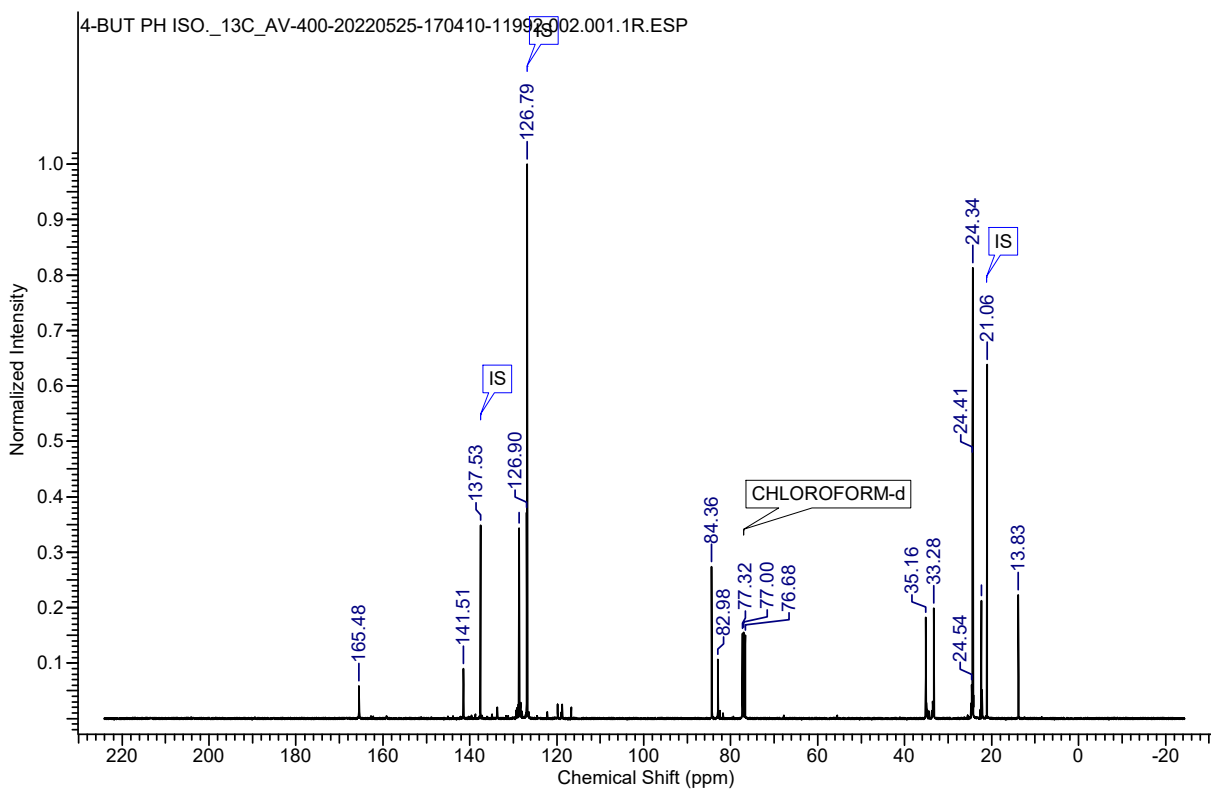

Figure S18.  $^{13}\text{C}$  NMR spectrum of **2i** ( $\text{CDCl}_3$ , 101 MHz, 298 K).

**N-(2,6-diisopropylphenyl)-N-(4,4,5,5-tetramethyl-1,3,2-dioxaborolan-2-yl)formamide (2j):**

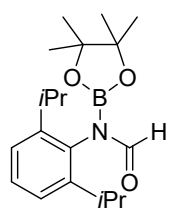

$^1\text{H}$  NMR ( $\text{CDCl}_3$ , 500 MHz, 298 K):  $\delta$  8.91 (s, 1H, NCHO), 7.15-7.08 (m, 3H, PhH), 4.97 (s, 2H, NCH<sub>2</sub>), 3.27-3.22 {q, 1H, CH-(CH<sub>3</sub>)<sub>2</sub>}, 2.83-2.78 (q, 1H, CH-(CH<sub>3</sub>)<sub>2</sub>), 1.22 (s, 12H, CH<sub>3</sub>), 1.15-1.13 {d, 6H, CH-(CH<sub>3</sub>)<sub>2</sub>}, 1.04-1.02 {d, 6H, CH-(CH<sub>3</sub>)<sub>2</sub>} ppm;  $^{13}\text{C}\{^1\text{H}\}$  NMR ( $\text{CDCl}_3$ , 101 MHz, 298 K):  $\delta$  165.45 (s, 1 C), 147.31 (s, 1 C), 145.22 (s, 1 C), 142.92 (s, 1 C), 128.37 (s, 1 C), 126.90 (s, 1 C), 123.46 (s, 1 C), 123.35 (s, 1 C), 123.28 (s, 1 C), 84.39 (s, 1 C), 82.73 (s, 1 C), 82.21 (s, 1 C), 77.07 (s, 1 C), 28.65 (s, 1 C), 27.98 (s, 1 C), 24.81 (s, 1 C), 24.45 (s, 1 C), 24.34 (s, 1 C), 24.33 (s, 1 C), 23.78 (s, 1 C), 23.57 (s, 1 C), 22.76 (s, 1 C) ppm.

The spectroscopic data is consistent with the literature data.<sup>S2</sup>

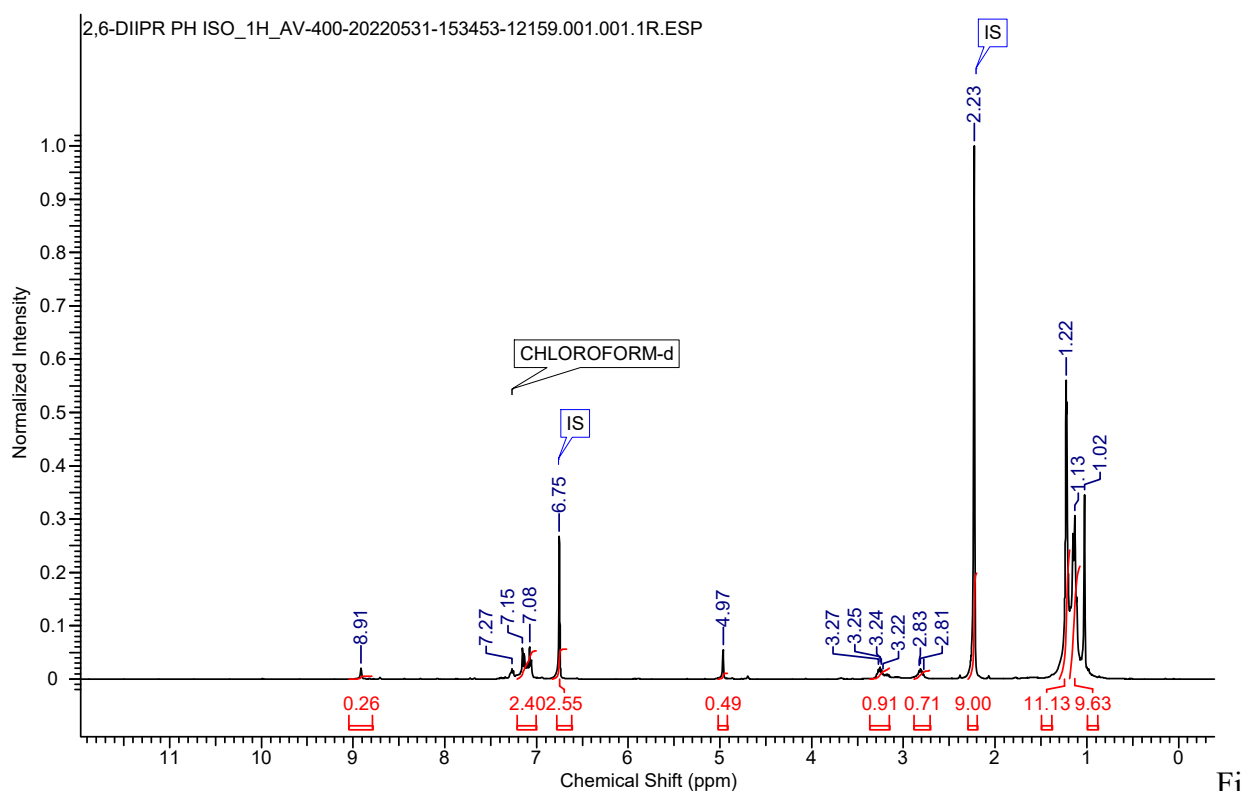

Figure S19.  $^1\text{H}$  NMR spectrum of **2j** ( $\text{CDCl}_3$ , 400 MHz, 298 K).

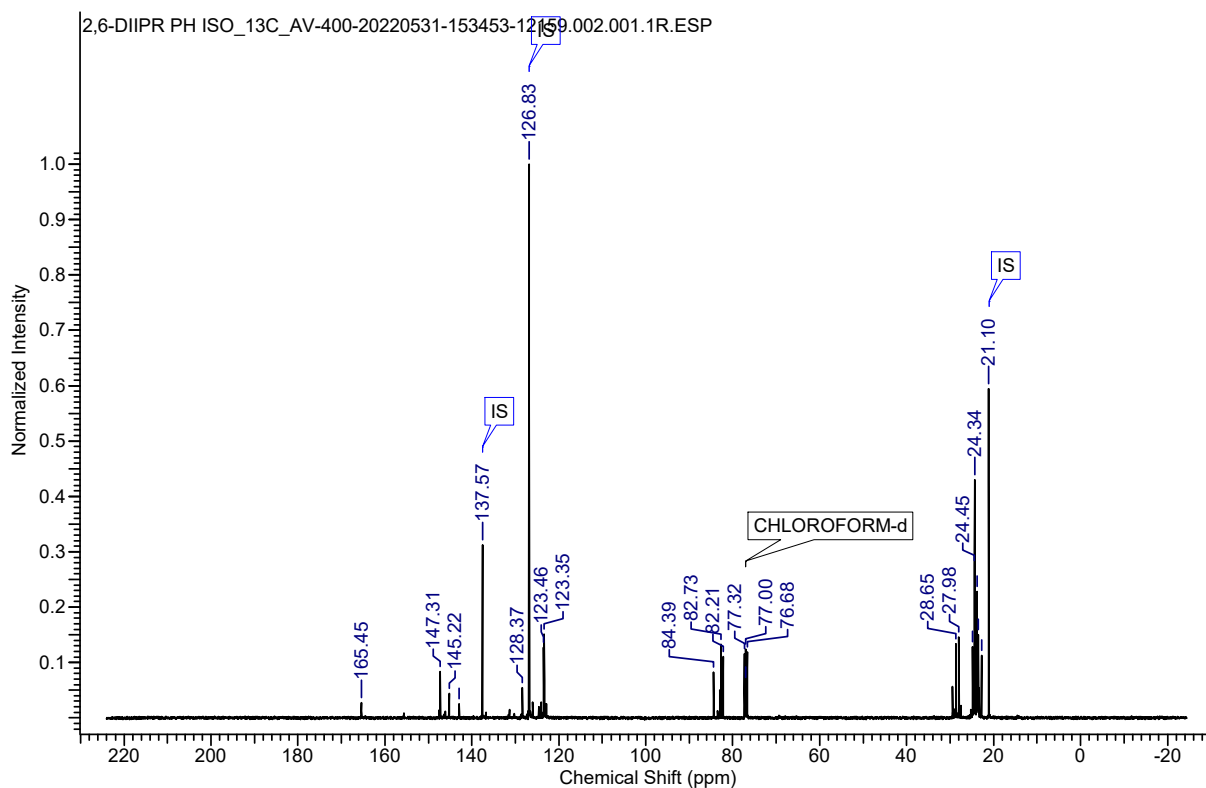

Figure S20.  $^{13}\text{C}$  NMR spectrum of **2j** ( $\text{CDCl}_3$ , 101 MHz, 298 K).

**N-(4-methoxyphenyl)-N-(4,4,5,5-tetramethyl-1,3,2-dioxaborolan-2-yl)formamide (2k):**  $^1\text{H}$

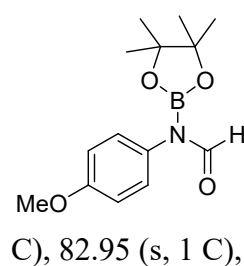 NMR ( $\text{CDCl}_3$ , 500 MHz, 298 K):  $\delta$  8.94 (s, 1H, NCHO), 6.99-6.96 (d, 2H, PhH), 6.82-6.80 (d, 2H, PhH), 3.69 (s, 3H, PhCH<sub>3</sub>), 1.22 (s, 12H, CH<sub>3</sub>) ppm;  
 $^{13}\text{C}\{^1\text{H}\}$  NMR ( $\text{CDCl}_3$ , 101 MHz, 298 K):  $\delta$  165.56 (s, 1 C), 158.25 (s, 1 C), 128.18 (s, 1 C), 125.45 (s, 1 C), 124.04 (s, 1 C), 114.02 (s, 1 C), 84.37 (s, 1 C), 82.95 (s, 1 C), 55.16 (s, 1 C), 24.41 (s, 1 C), 24.34 (s, 1 C) ppm.

The spectroscopic data is consistent with the literature data.<sup>S2</sup>



**N-(4-ethoxyphenyl)-N-(4,4,5,5-tetramethyl-1,3,2-dioxaborolan-2-yl)formamide (2I):**  $^1\text{H}$

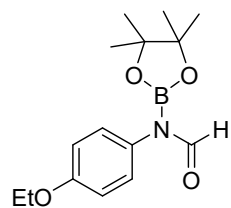

NMR ( $\text{CDCl}_3$ , 500 MHz, 298 K):  $\delta$  8.93 (s, 1H, NCHO), 7.11-7.09 (d, 2H, PhH), 6.95-6.93 (d, 2H, PhH), 4.08-4.03 (q, 2H, Ph- $\text{OCH}_2\text{CH}_3$ ), 1.47-1.44 (t, 3H, Ph- $\text{OCH}_2\text{CH}_3$ ), 1.36 (s, 12H,  $\text{CH}_3$ ) ppm;  $^{13}\text{C}\{^1\text{H}\}$  NMR ( $\text{CDCl}_3$ , 101 MHz, 298 K):  $\delta$  ppm 165.58 (s, 1 C), 157.67 (s, 1 C), 129.30 (s, 1 C), 128.14 (s, 1 C), 118.66 (s, 1 C), 115.12 (s, 1 C), 114.86 (s, 1 C), 114.51 (s, 1 C), 84.35 (s, 1 C), 82.98 (s, 1 C), 63.59 (s, 1 C), 63.54 (s, 1 C), 63.36 (s, 1 C), 24.75 (s, 1 C), 24.53 (s, 1 C), 24.40 (s, 1 C), 24.34 (s, 1 C), 24.25 (s, 1 C), 14.71 (s, 1 C), 14.63 (s, 1 C), 14.59 (s, 1 C) ppm.

The spectroscopic data is consistent with the literature data.<sup>S2</sup>

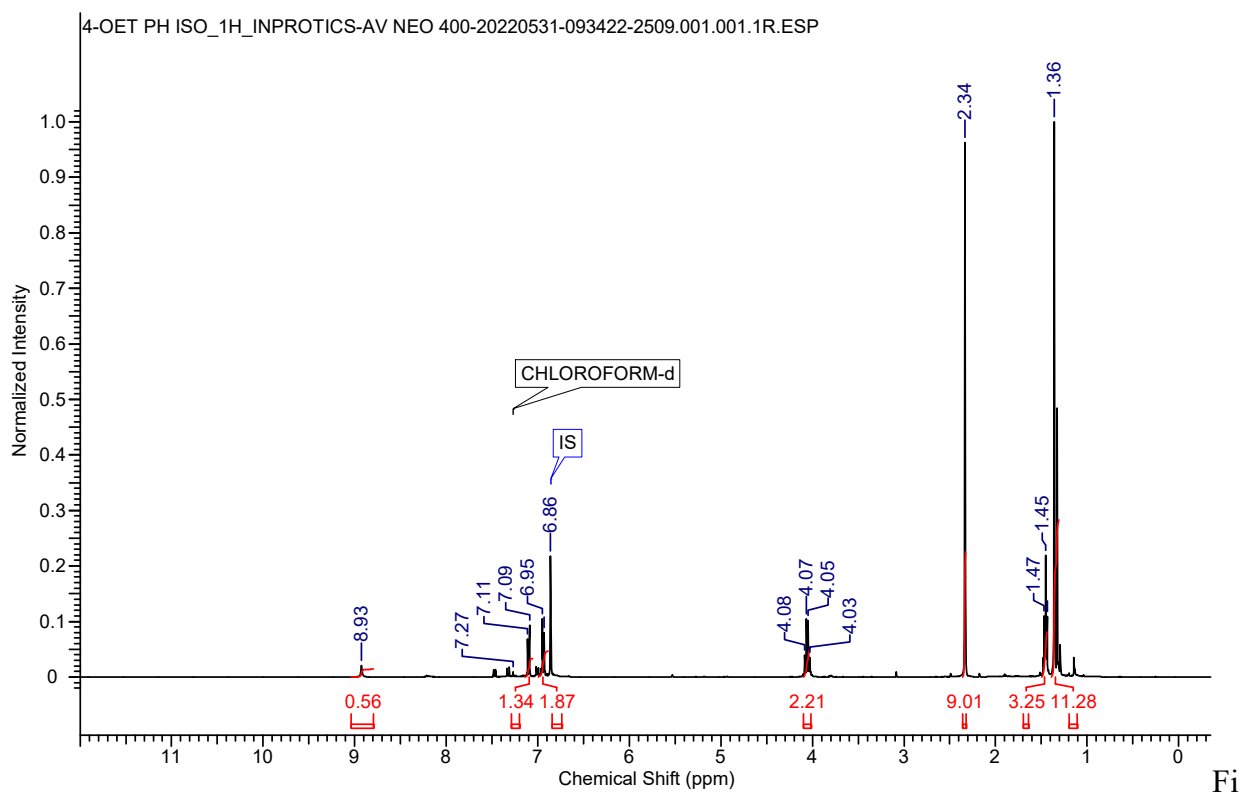

Figure S23.  $^1\text{H}$  NMR spectrum of **2I** ( $\text{CDCl}_3$ , 500 MHz, 298 K).

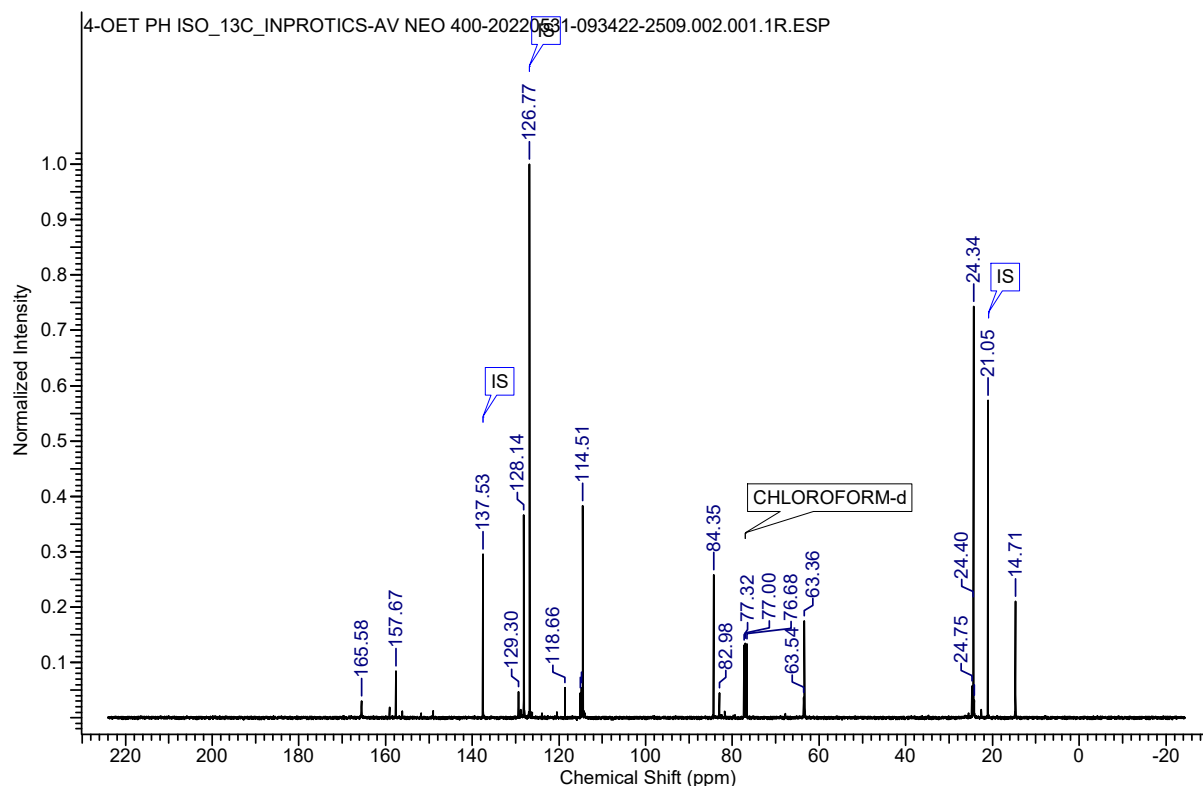

Figure S24.  $^{13}\text{C}$  NMR spectrum of **2I** ( $\text{CDCl}_3$ , 100.28 MHz, 298 K).

**N-benzyl-N-(4,4,5,5-tetramethyl-1,3,2-dioxaborolan-2-yl)formamide (2I):**  $^1\text{H}$  NMR ( $\text{CDCl}_3$ , 500 MHz, 298 K):  $\delta$  8.79 (s, 1H, NCHO), 7.43-7.29 (m, 5H, PhH), 5.10 (s, 2H, NCH<sub>2</sub>), 4.58 (s, 2H, PhCH<sub>2</sub>), 1.35 (s, 12H, CH<sub>3</sub>) ppm;  $^{13}\text{C}\{^1\text{H}\}$  NMR ( $\text{CDCl}_3$ , 101 MHz, 298 K):  $\delta$  165.61 (s, 1 C), 148.98 (s, 1 C), 138.76 (s, 1 C), 135.71 (s, 1 C), 128.99 (s, 1 C), 128.79 (s, 1 C), 128.72 (s, 1 C), 128.57 (s, 1 C), 128.50 (s, 1 C), 128.33 (s, 1 C), 128.18 (s, 1 C), 128.09 (s, 1 C), 128.05 (s, 1 C), 127.83 (s, 1 C), 127.75 (s, 1 C), 127.19 (s, 1 C), 126.96 (s, 1 C), 126.60 (s, 1 C), 84.28 (s, 1 C), 82.99 (s, 1 C), 46.12 (s, 1 C), 44.29 (s, 1 C), 43.41 (s, 1 C), 24.53 (s, 1 C), 24.42 (s, 1 C) ppm.

The spectroscopic data is consistent with the literature data.<sup>S2</sup>





**N-(naphthalen-1-yl)-N-(4,4,5,5-tetramethyl-1,3,2-dioxaborolan-2-yl)formamide(2n):**

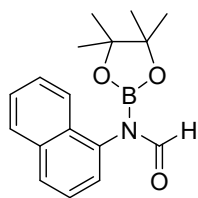

$^1\text{H}$  NMR ( $\text{CDCl}_3$ , 400 MHz, 298 K):  $\delta$  ppm 9.20 (s, 1 H), 7.96-7.90 (m, 2 H), 7.81-7.79 (d, 1H), 7.60-7.55 (m, 3H), 7.37-7.35 (d, 1H), 1.36 (s, 12 H) ppm;

$^{13}\text{C}\{^1\text{H}\}$  NMR ( $\text{CDCl}_3$ , 101 MHz, 298 K):  $\delta$  ppm 165.49 (s, 1 C), 134.27 (s, 1 C), 133.14 (s, 1 C), 130.07 (s, 1 C), 128.35 (s, 1 C), 128.18 (s, 1 C), 126.43 (s, 1 C), 125.96 (s, 1 C), 125.57 (s, 1 C), 125.37 (s, 1 C), 122.26 (s, 1 C), 84.46 (s, 1 C), 82.99 (s, 1 C), 24.43 (s, 1 C), 24.12 (s, 1 C) ppm.

The spectroscopic data is consistent with the literature data. <sup>S2</sup>

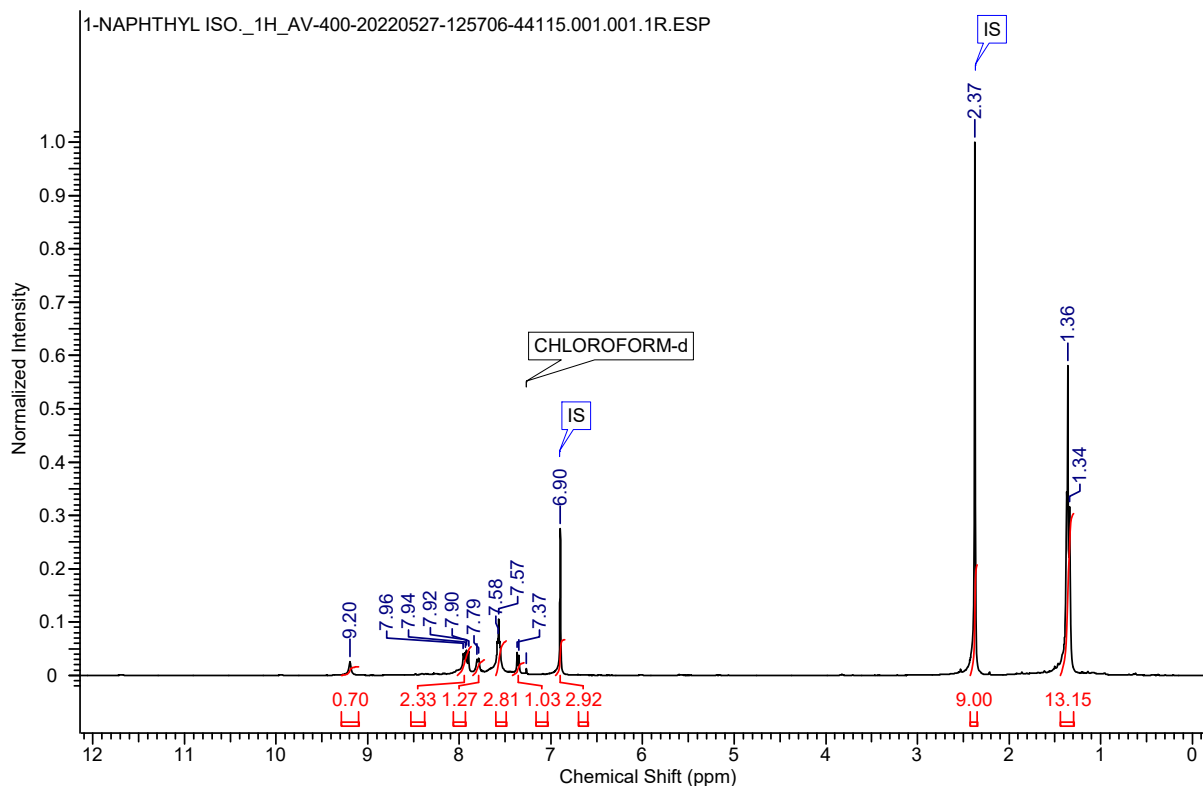

Figure S27.  $^1\text{H}$  NMR spectrum of **2n** ( $\text{CDCl}_3$ , 400 MHz, 298 K).

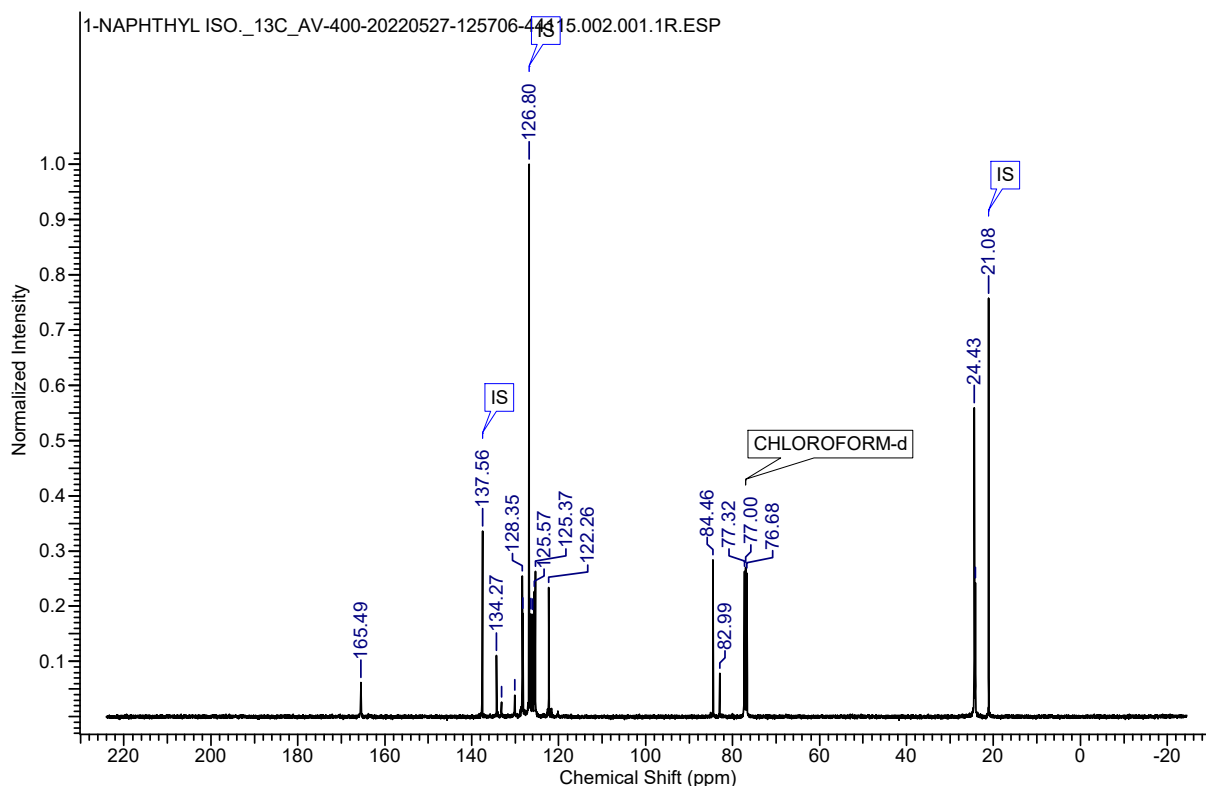

Figure S28.  $^{13}\text{C}$  NMR spectrum of **2n** ( $\text{CDCl}_3$ , 101 MHz, 298 K).

**N-octyl-N-(4,4,5,5-tetramethyl-1,3,2-dioxaborolan-2-yl)formamide (2o):**  $^1\text{H}$  NMR ( $\text{CDCl}_3$ ,

400 MHz, 298 K):  $\delta$  8.69 (s, 1H, *NCHO*), 3.37-3.34 (t, 2H, *Octyl*), 1.53 (bs, 2H, *Octyl*), 1.32 (s, 12H,  $\text{CH}_3$ ) 1.29-1.25 (m, 12H, *Octyl*), 0.93 (t, 3H, *Octyl*) ppm;  
 $^{13}\text{C}\{^1\text{H}\}$  NMR ( $\text{CDCl}_3$ , 101 MHz, 298 K):  $\delta$  ppm 165.91 (s, 1 C), 83.93 (s, 1 C), 82.93 (s, 1 C), 48.29 (s, 1 C), 42.86 (s, 1 C), 39.96 (s, 1 C), 31.71 (s, 1 C), 31.65 (s, 1 C), 29.49 (s, 1 C), 29.17 (s, 1 C), 29.14 (s, 1 C), 29.07 (s, 1 C), 26.73 (s, 1 C), 26.61 (s, 1 C), 24.43 (s, 1 C), 24.40 (s, 1 C), 24.34 (s, 1 C), 22.54 (s, 1 C), 22.51 (s, 1 C), 13.96 (s, 1 C) ppm.

The spectroscopic data is consistent with the literature data.<sup>S2</sup>



**N-(2-ethylhexyl)-N-(4,4,5,5-tetramethyl-1,3,2-dioxaborolan-2-yl)formamide (2p):**  $^1\text{H}$  NMR

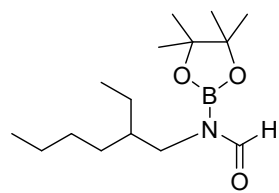

( $\text{CDCl}_3$ , 400 MHz, 298 K):  $\delta$  8.70 (s, 1H, NCHO), 3.25-3.23 (t, 2H,  $\text{NCH}_2$ ), 1.31 (s, 12H,  $\text{CH}_3$ ) 1.29 (bs, 8H,  $\text{CH}_2$ ), 0.94-0.89 (m, 7H,  $\text{CH}_2\text{CH}_3$ ) ppm;  $^{13}\text{C}\{^1\text{H}\}$  NMR ( $\text{CDCl}_3$ , 101 MHz, 298 K):  $\delta$  166.16 (s, 1 C), 83.95 (s, 1 C), 82.95 (s, 1 C), 43.76 (s, 1 C), 40.71 (s, 1 C), 39.09 (s, 1 C), 38.27 (s, 1 C), 30.72 (s, 1 C), 30.35 (s, 1 C), 28.69 (s, 1 C), 28.42 (s, 1 C), 24.39 (s, 1 C), 24.33 (s, 1 C), 24.30 (s, 1 C), 23.92 (s, 1 C), 23.51 (s, 1 C), 22.98 (s, 1 C), 22.89 (s, 1 C), 13.97 (s, 1 C), 13.94 (s, 1 C), 10.65 (s, 1 C), 10.35 (s, 1 C) ppm.

The spectroscopic data is consistent with the literature data.<sup>S2</sup>

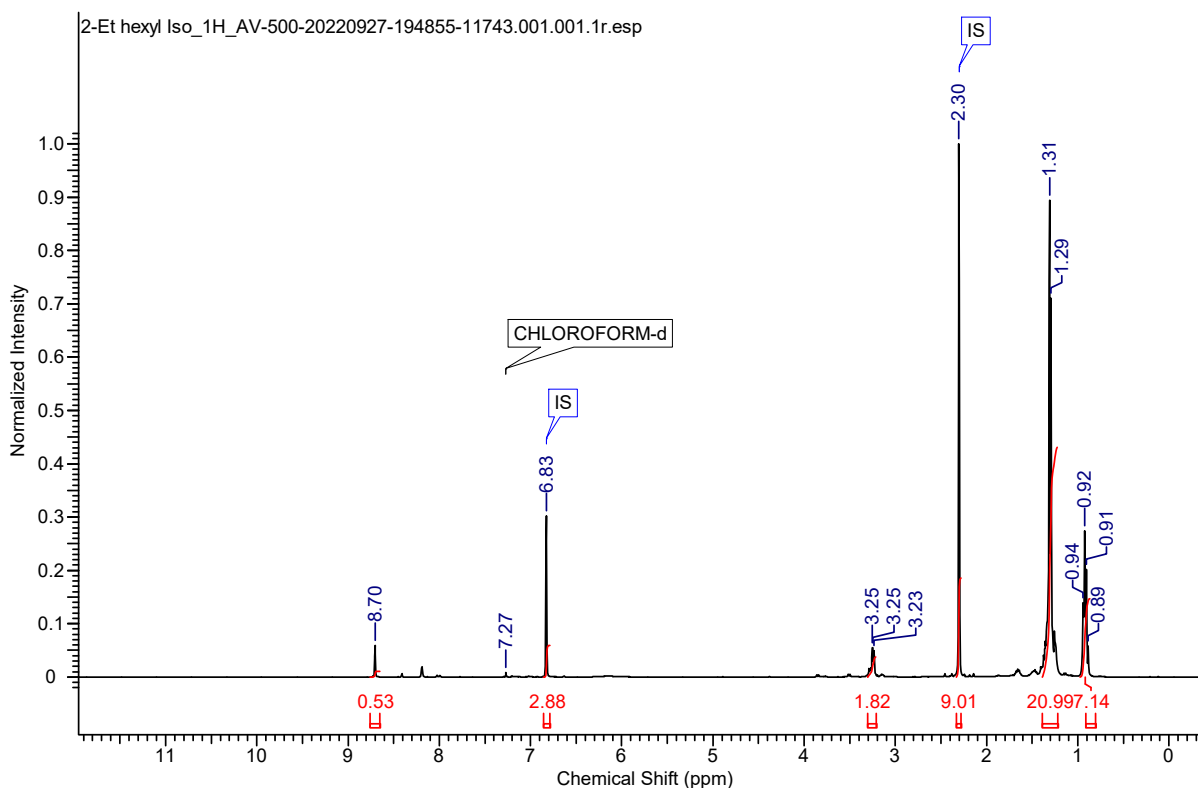

Figure S31.  $^1\text{H}$  NMR spectrum of **2p** ( $\text{CDCl}_3$ , 400 MHz, 298 K).

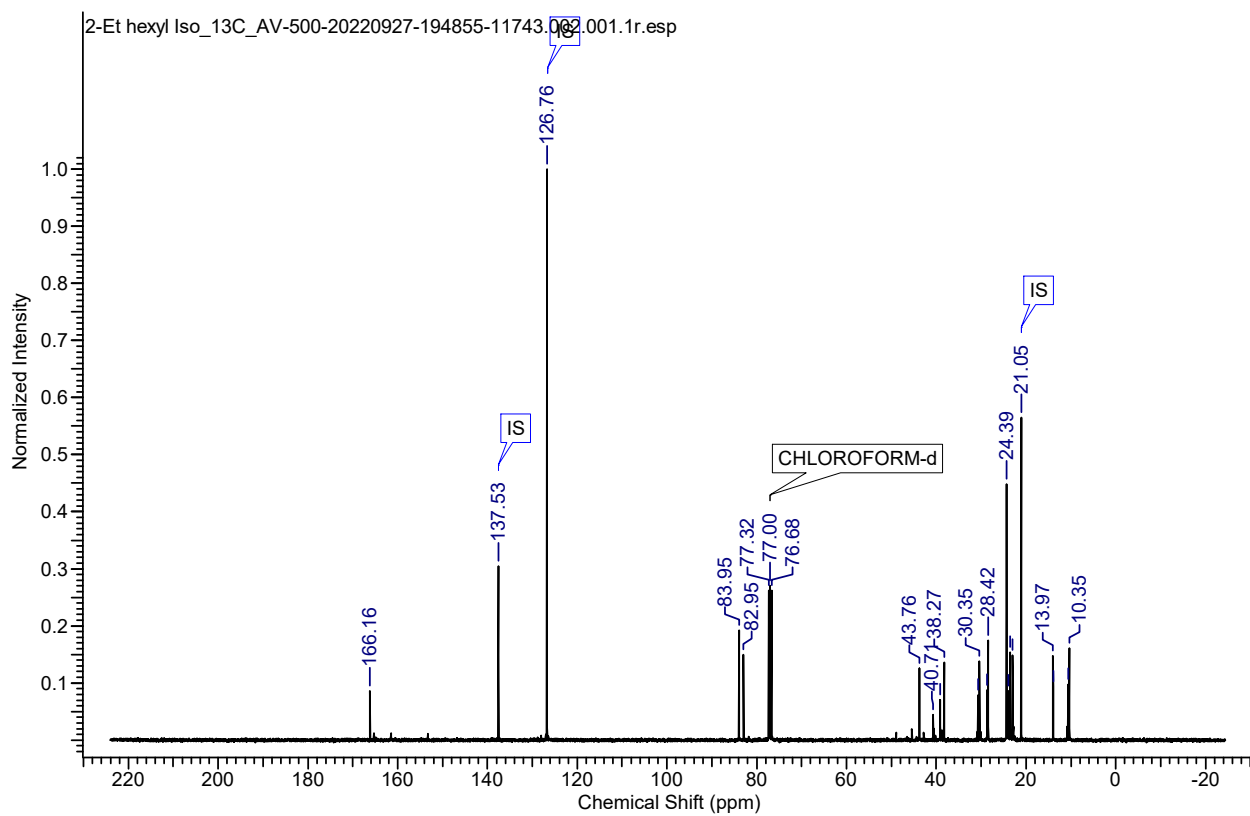

Figure S32. <sup>13</sup>C NMR spectrum of **2p** (CDCl<sub>3</sub>, 101 MHz, 298 K).

❖ **List of unsuccessful substrates for catalytic hydroboration:**

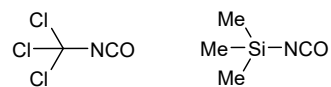

Very less yield due to unidentified side reactions

❖ **Competitive experiment for alkene/alkyne/nitrile/ketone/ester hydroboration- a selectivity study:**

**1. Hydroboration of phenyl isocyanate and acetophenone in presence of 1 equiv. HBpin:**

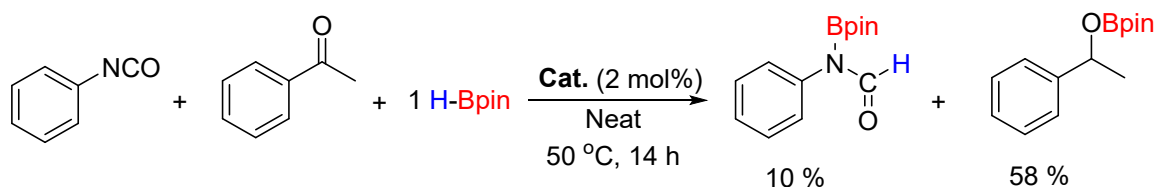

Scheme S2. Hydroboration of phenyl isocyanate and 4-fluoro acetophenone.

Phenyl isocyanate (0.25 mmol), acetophenone (0.25 mmol), pinacolborane (32 mg, 0.25 mmol), catalyst (2.0 mol% for **1**) were charged in a Schlenk tube inside the glove box. The reaction mixture was stirred for 14 hours at 50 °C after in neat conditions. Upon completion of the reaction, the progress of the reaction was monitored by <sup>1</sup>H NMR after addition of mesitylene (0.25 mmol) as an internal standard in CDCl<sub>3</sub>. A sharp singlet resonance at  $\delta = 8.89$  ppm indicates for the formation of hydroboration product from phenyl isocyanate and a quartet resonance at 5.29-5.24 ppm indicates the hydroboration product from acetophenone.

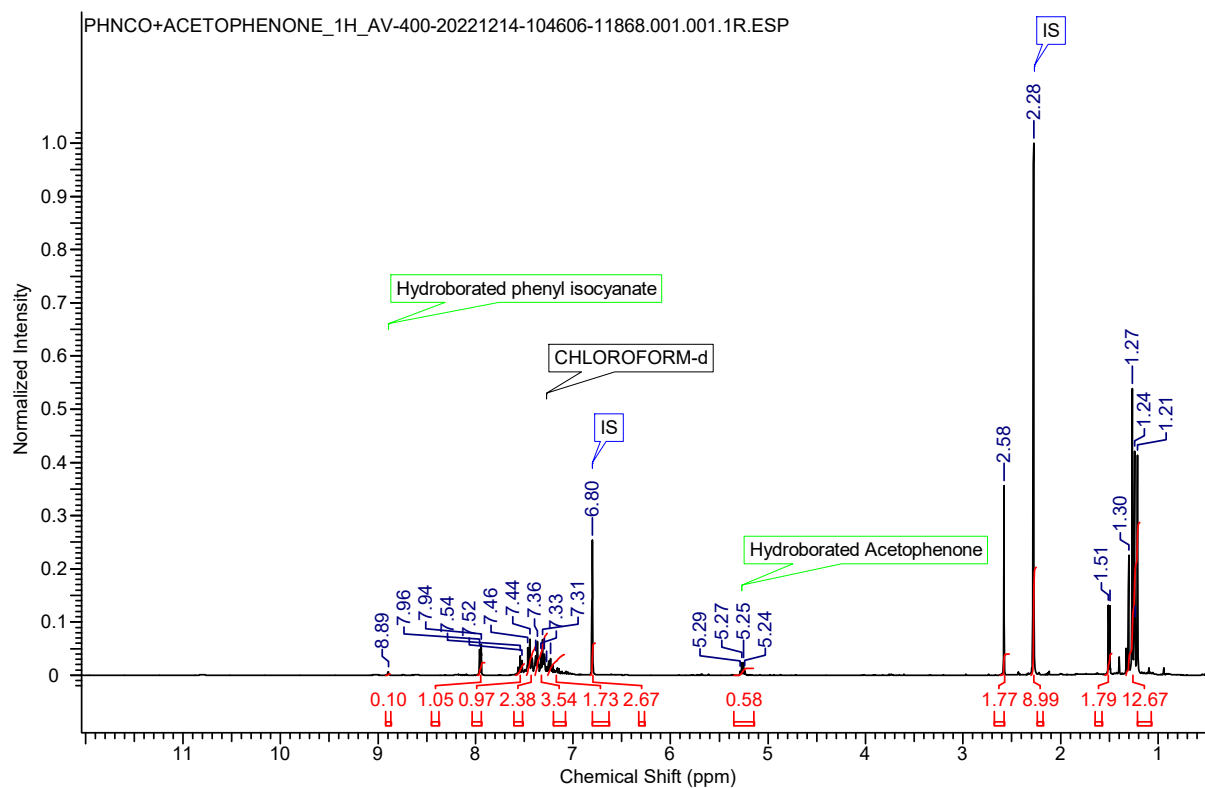

Figure S33.  $^1\text{H}$  NMR spectrum of the reaction of phenyl isocyanate and acetophenone in presence of one equiv. HBpin ( $\text{CDCl}_3$ , 400 MHz, 298 K).

## ❖ Mechanistic investigation:

### Stoichiometric reaction of catalyst **1** and HBpin:

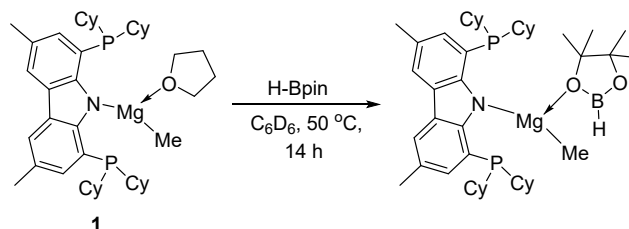

Scheme S3. Stoichiometric reaction of **1** with HBpin and the tentative product formation.

A solution of HBpin (20 mg, 0.14 mmol) in C<sub>6</sub>D<sub>6</sub> was added drop by drop to the C<sub>6</sub>D<sub>6</sub> solution of **1** (90 mg, 0.14 mmol) at room temperature or inside the glove box. The reaction mixture was stirred/heated for 14 hours at 50 °C. After that the reaction mixture was subjected for characterization. <sup>1</sup>H NMR (C<sub>6</sub>D<sub>6</sub>, 400 MHz, 298 K): <sup>1</sup>H NMR spectra shows a new peak at 2.29 ppm which can be a proton peak for HBPin. This supports the formation of O-coordinated magnesium methyl complex. The <sup>11</sup>B NMR also indicates that the Bpin moiety is coordinated to the Mg centre through one of the O-atoms. <sup>11</sup>B NMR (C<sub>6</sub>D<sub>6</sub>, 128 MHz, 298 K): δ 33.96 (s, Me-Bpin), 28.90 (d, for unreacted HBpin), 21.92 (s, Bpin coordinated catalyst) ppm.



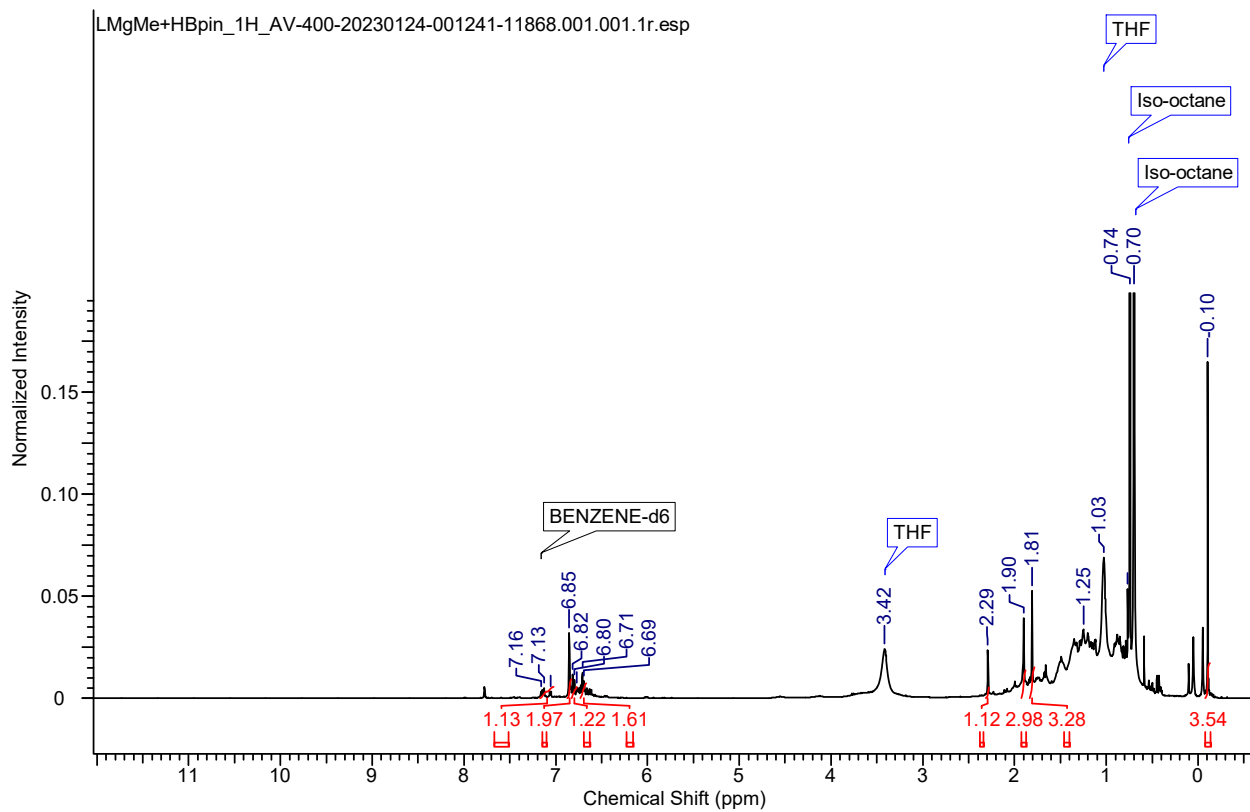

Figure S34.  $^1\text{H}$  NMR spectrum of the reaction of **1** with HBpin ( $\text{C}_6\text{D}_6$ , 400 MHz, 298 K).

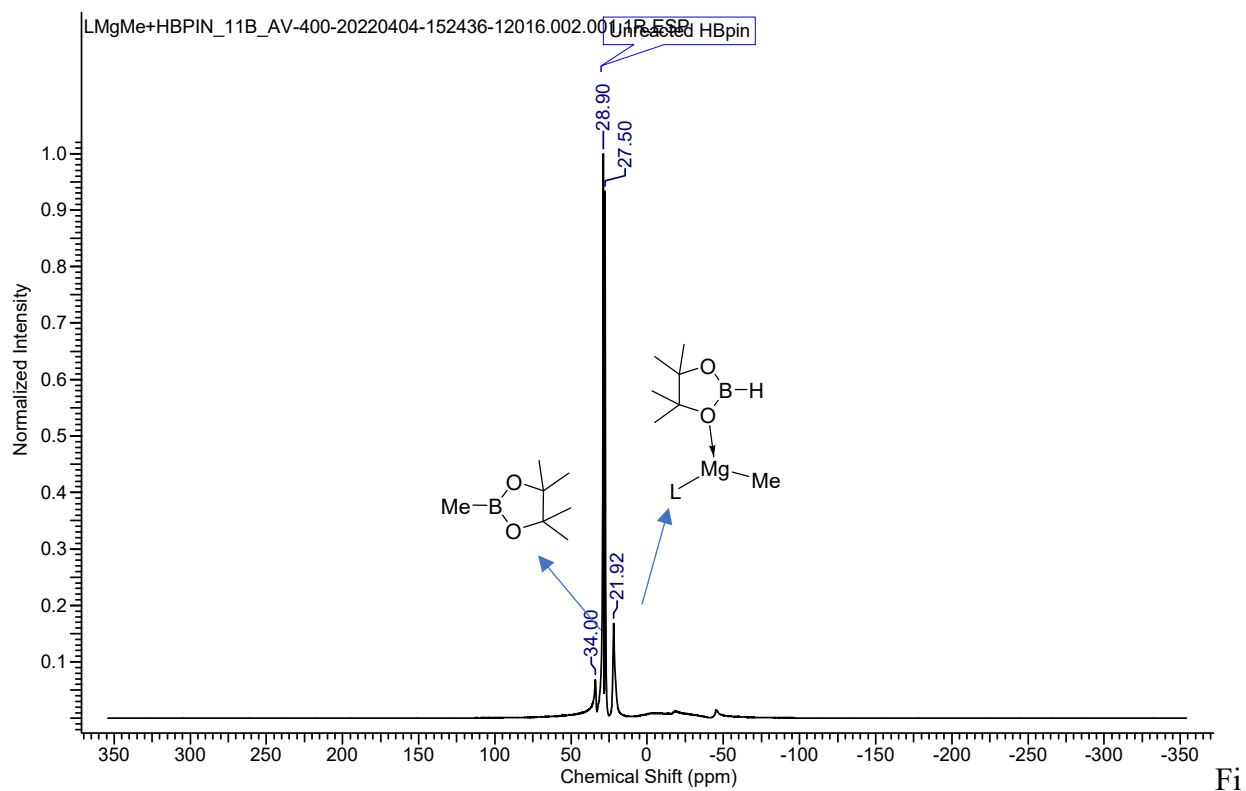

Figure S35.  $^{11}\text{B}$  NMR spectrum of the reaction of **1** with HBpin ( $\text{C}_6\text{D}_6$ , 128 MHz, 298 K).

### Heating of the catalyst at 70 °C for 8 hours under vacuum:

We have heated the catalyst under vacuum at 70 °C for 8 hours but we did not observe the removal of THF confirmed by  $^1\text{H}$  NMR.

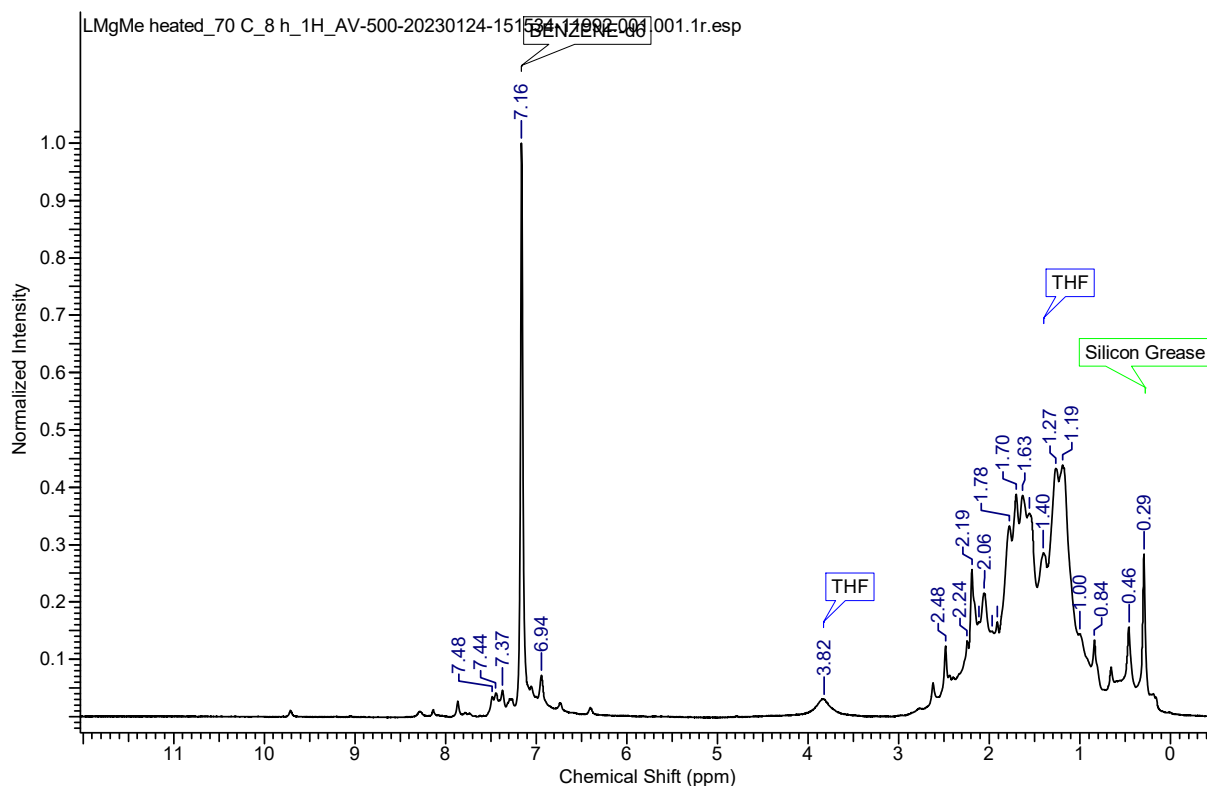

Figure S36.  $^1\text{H}$  NMR spectrum heating of the catalyst at 70 °C for 8 hours under vacuum ( $\text{C}_6\text{D}_6$ , 128 MHz, 298 K).

### Stoichiometric reaction of **1** with phenyl isocyanate or ethyl isocyanate:

No reaction was observed when an equimolar amount of **1** was treated separately with phenyl isocyanate or ethyl isocyanate in THF/toluene solvent at room temperature and at 60-100 °C. Further heating at 80-100 °C overnight in neat conditions also does not indicate any appreciable changes in the  $^1\text{H}$  NMR spectra.

### Hydroboration of 4-bromo phenyl isocyanate and o-tolyl isocyanate with $\text{BH}_3 \cdot \text{SMe}_2$ :

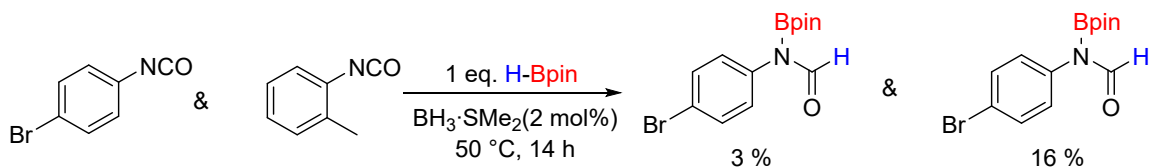

Scheme S4. Synthetic scheme for the reaction of 4-bromo phenyl isocyanate and o-tolyl isocyanate with  $\text{BH}_3 \cdot \text{SMe}_2$ .

To identify whether the  $\text{BH}_3$  is behaving as hidden catalyst in the hydroboration of phenyl isocyanate or not, we performed the reaction with  $\text{BH}_3 \cdot \text{SMe}_2$ . A Screw cap NMR tube was charged with  $\text{BH}_3 \cdot \text{SMe}_2$  (2 mol%) inside the argon-filled glovebox. Subsequently 4-bromo phenyl isocyanate (0.25 mmol, 1.0 equiv) and 2-methyl phenyl isocyanate were added to the reaction mixture in separate NMR tubes and heated at  $50^\circ\text{C}$  up to 14 hours in an oil bath. After completion of the reaction 0.25 mmol mesitylene was added as an internal standard prior to the NMR measurement in  $\text{CDCl}_3$  solvent. The  $^1\text{H}$  NMR suggests that there is very less product formation in both the reactions, i.e., N-boryl formamide was observed (Figure S35 and S36), which clearly suggest very less influence of  $\text{BH}_3$  as an active catalyst for the hydroboration of isocyanate.

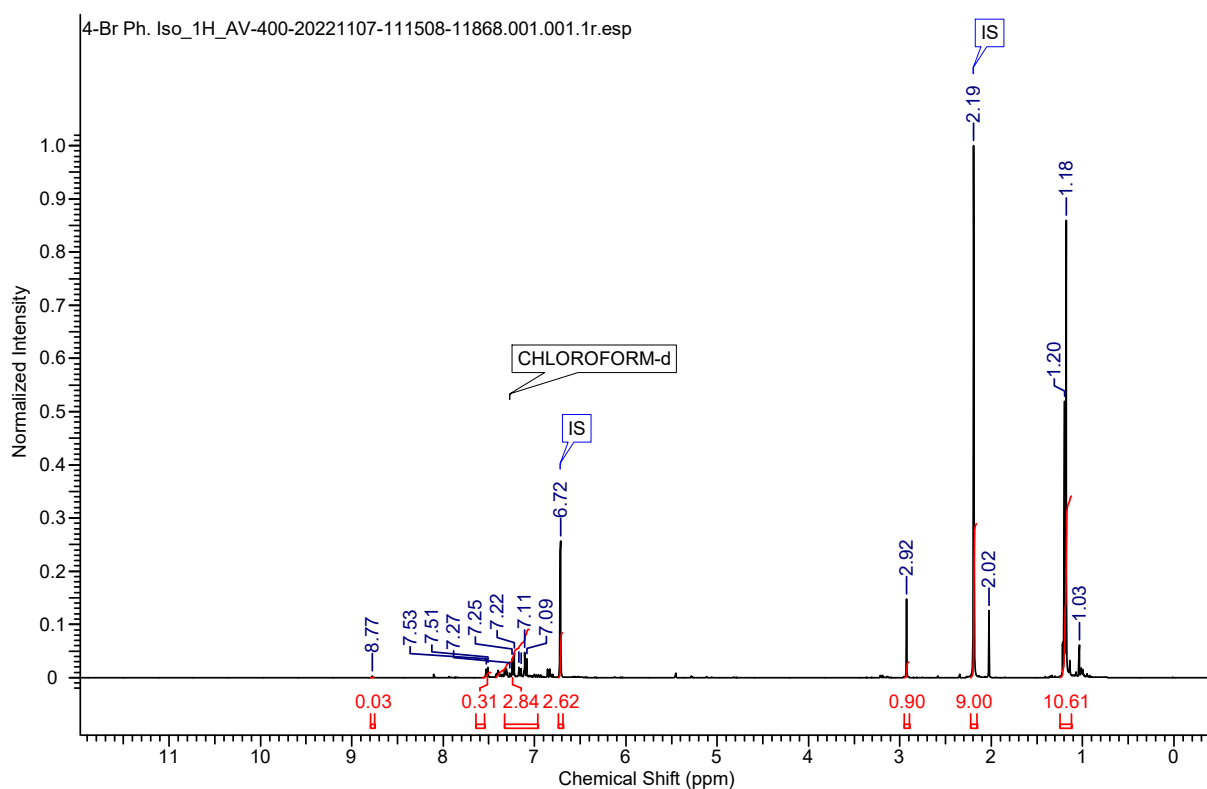

Figure S37.  $^1\text{H}$  NMR spectrum of reaction of 4-bromo phenyl isocyanate with  $\text{BH}_3 \cdot \text{SMe}_2$  at  $50^\circ\text{C}$  ( $\text{CDCl}_3$ , 400 MHz, 298 K).

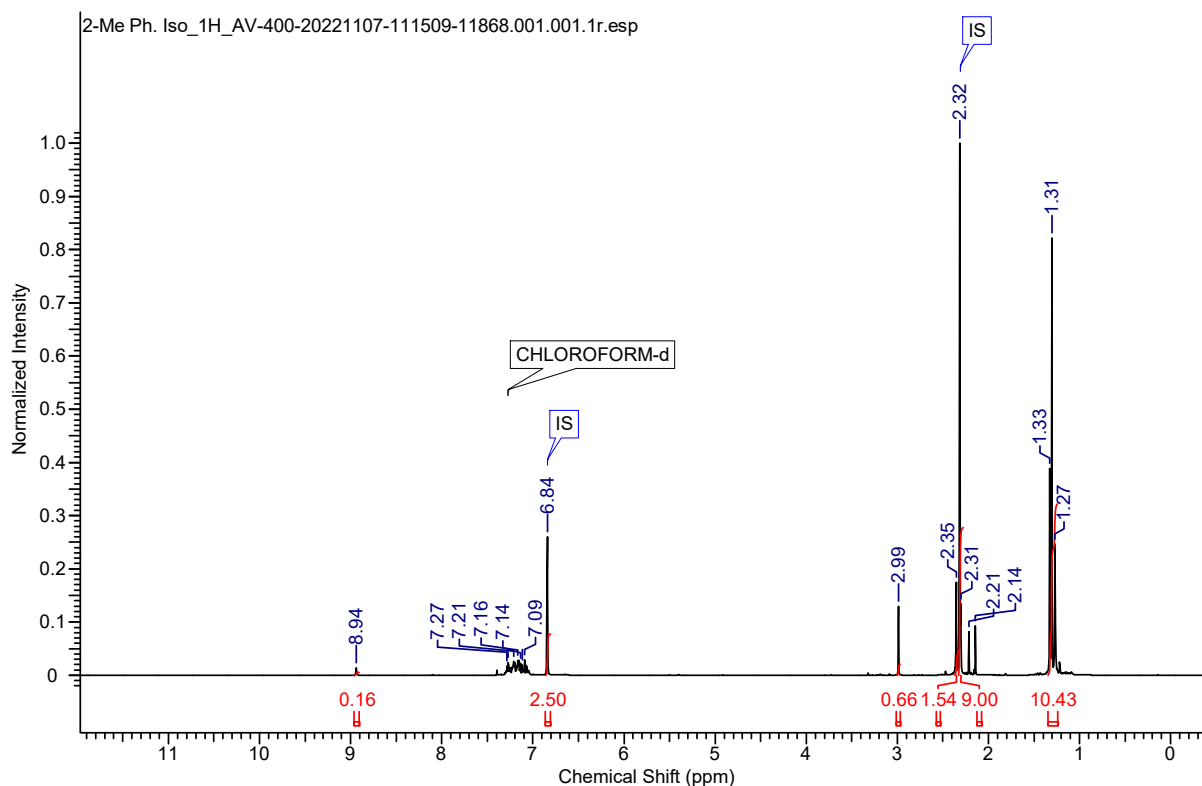

Figure S38.  $^1\text{H}$  NMR spectrum of reaction of 2-methyl phenyl isocyanate with  $\text{BH}_3 \cdot \text{SMe}_2$  at  $50^\circ\text{C}$  ( $\text{CDCl}_3$ , 400 MHz, 298 K).

#### ❖ Details of the theoretical calculations:

Full quantum calculations have been carried out with Density Functional theory(DFT)<sup>S3</sup> using Turbomole 7.4. <sup>S4</sup> The TZVP basis set have been employed in all the calculations. <sup>S5</sup> Geometry optimizations were performed using the Perdew, Burke, and Ernzerhof functional (PBE).<sup>S6</sup> Dispersion corrections <sup>S7</sup> have been included in all the calculations. The resolution of identity (RI) <sup>S8</sup> along with the multipole accelerated RI (marij) <sup>S9</sup> approximations have been used for an accurate and efficient treatment of the electronic Coulomb term in the DFT calculations. Solvent corrections have also been included in all the calculations using the cosmo model, <sup>S10</sup> with epsilon ( $\epsilon$ ) = 2.48, to model the HBpin which has been employed to study the reaction involved. Necessary care was taken to ensure that the obtained transition state structures possessed only one imaginary frequency corresponding to the correct normal mode, in order to obtain more reliable energy values for the investigated potential energy surface. In addition, intrinsic reaction coordinate (IRC)<sup>S11</sup> calculations were done with all the transition states in order to further confirm that they were the

correct transition states, yielding the correct reactant and product structures. The values reported here are  $\Delta G$  values, with zero-point energy, internal energy, and entropic contributions, with the temperature taken to be 323.15 K. This is because this is the temperature at which the experiments were done. The translational entropy term has been corrected by a free volume correction introduced by Mammen and co-workers.<sup>S12</sup> The efficiency of the catalytic cycle for the reaction mechanism investigated has been calculated with the AUTOF<sup>S13-S14</sup> program by employing the “Energetic Span Model” (ESM), developed by Shaik and co-workers.<sup>S14-S16</sup> This has been done for all the free energy profiles discussed in the manuscript. The turnover frequency (TOF) calculations take into account the principal rate-determining transition state, as well as the potentially rate-influencing transition states and intermediates during the catalysis process. In most cases, the TOF is calculated from the TOF-determining transition state (TDTS), the TOF-determining intermediate (TDI), and from the reaction energy,  $\Delta G_r$  as shown below:

$$\text{TOF} = \frac{KbT}{h} e^{-\delta E/RT}$$

$$\delta E = \text{TDTS} - \text{TDI} \quad \text{if TDTS appears after TDI}$$

$$\delta E = \text{TDTS} - \text{TDI} - \Delta G_r \quad \text{if TDTS appears before TDI}$$

$$\delta E = \text{TDTS} - \text{TDI} - \Delta G_r \quad \text{if TDTS appears before TDI}$$

This model has been employed to calculate the TOFs for the free energy profiles obtained for the mechanisms in the solvent phase discussed in the manuscript.

## Discarded Mechanisms

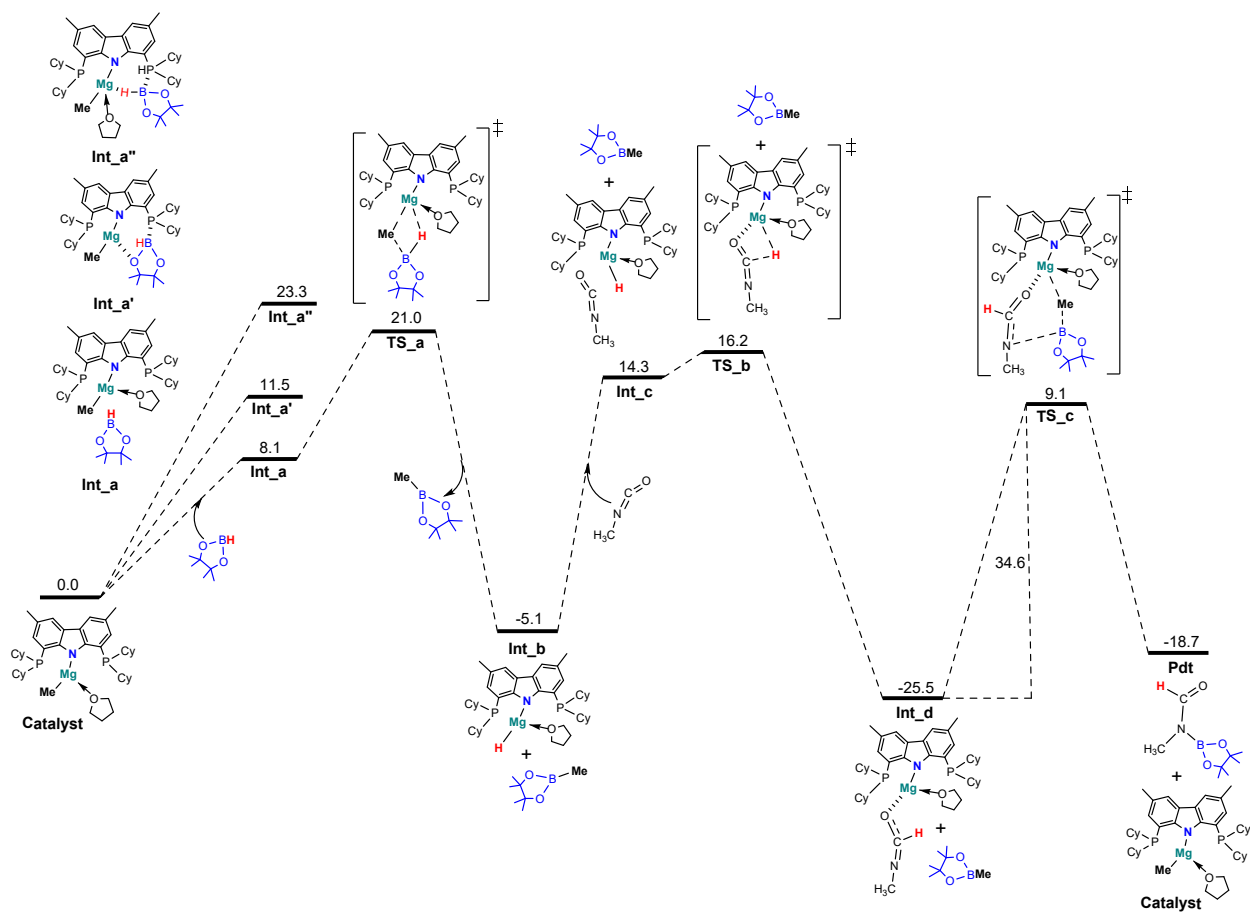

Figure S39. Reaction mechanism with DFT studies considering magnesium methyl as catalyst.

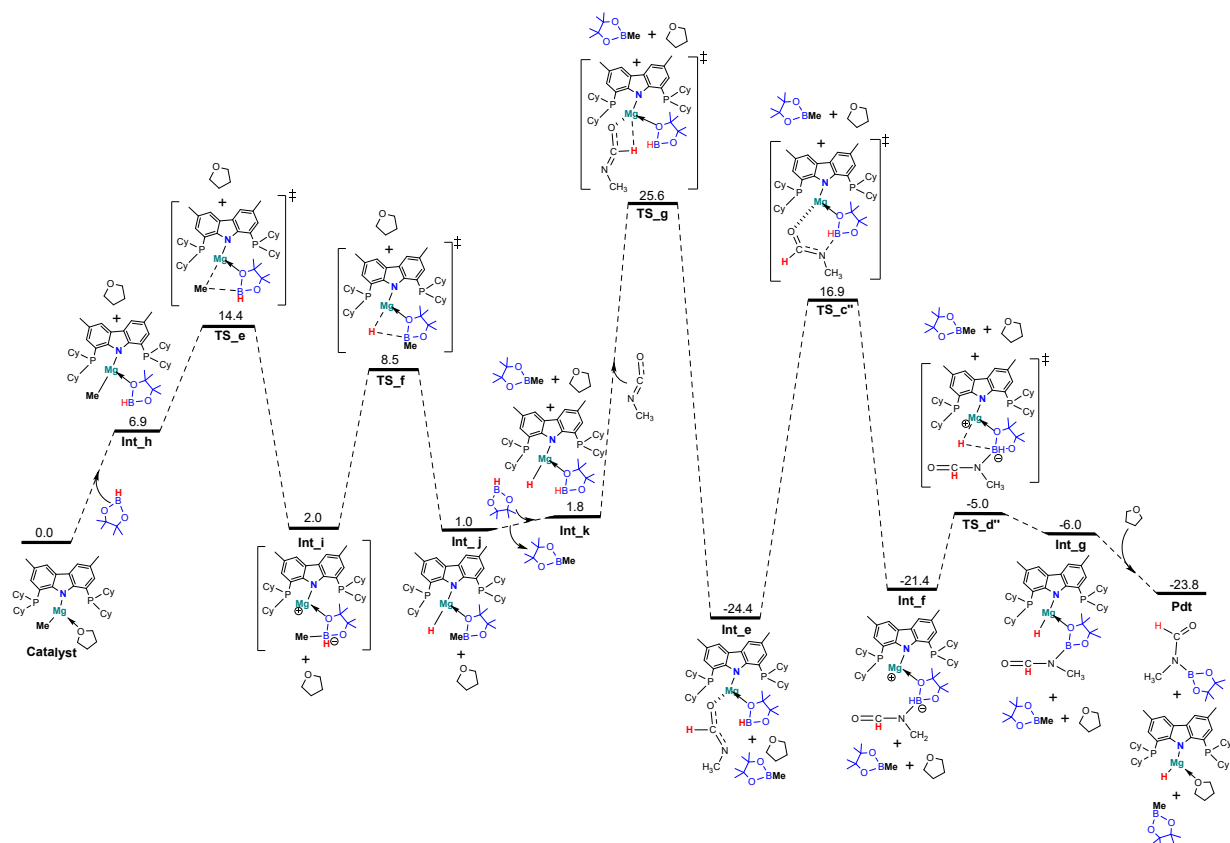

Figure S40. Mechanism via the formation of magnesium hydride



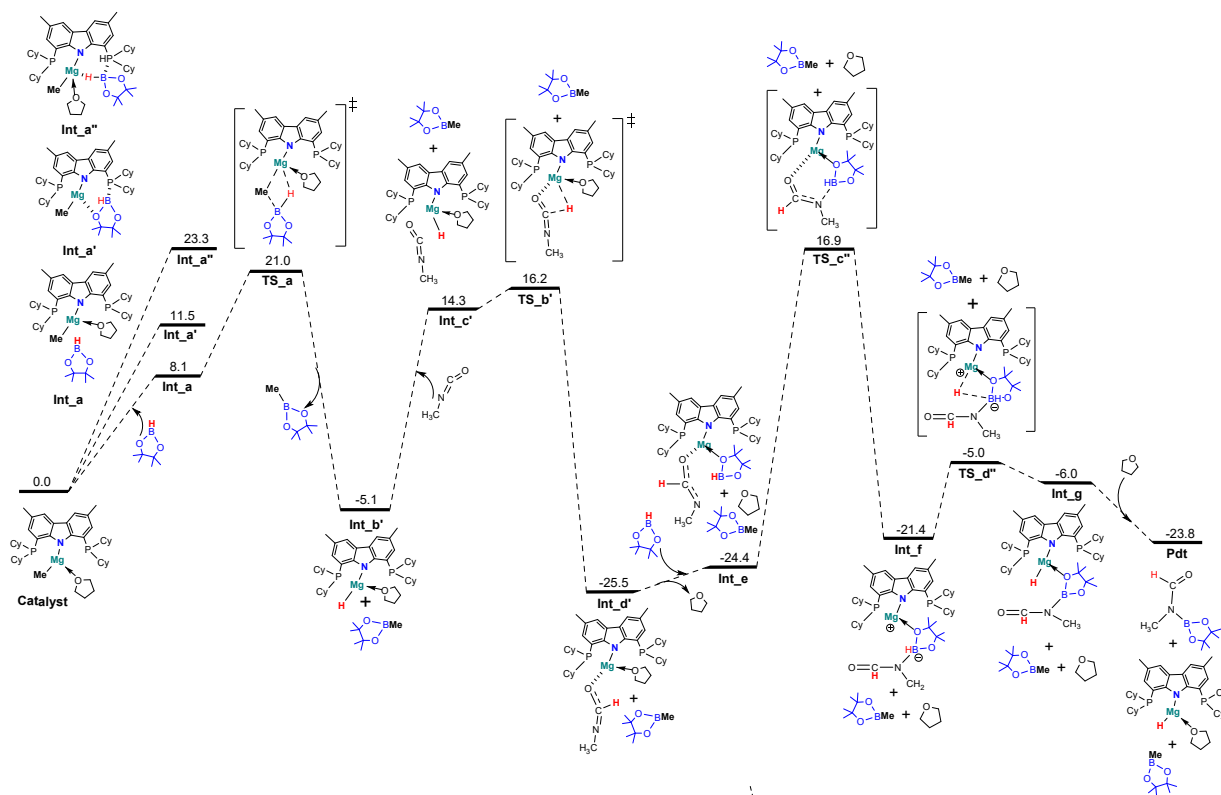

Figure S41. Alternative mechanism via the formation of magnesium hydride.

## ❖ References:

- (S1) R. Kumar, S. Dutta, V. Shrama, P. P. Singh, R. G. Gonnade, D. Koley and S. S. Sen, *Chem. Eur. J.*, 2022, **28**, e202201896 (1-8).
- (S2) R. K. Sahoo, N. Sarkar and S. Nembenna, *Angew. Chem., Int. Ed.*, 2021, **60**, 11991–12000.
- (S3) R. Ahlrichs, Bär, Michael, M. Häser, H. Horn and C. Kölmel, *Chem. Phys. Lett.*, 1989, **162**, 165–169.
- (S4) TURBOMOLE V7.4 2019, a development of University of Karlsruhe and Forschungszentrum Karlsruhe GmbH, 1989-2007, TURBOMOLE GmbH, since 2007; available from <http://www.turbomole.com>.
- (S5) S. Ansgar, H. Christian and A. Reinhard, *J. Chem. Phys.*, 1994, **100**, 5829–5835.
- (S6) J. P. Perdew, K. Burke and M. Ernzerhof, *Phys. Rev. Lett.*, 1996, **77**, 3865–3868.

- (S7) S. Grimme, J. Antony, S. Ehrlich and H. Krieg, *J. Chem. Phys.*, 2010, **132**, 154104–18.
- (S8) K. Eichkorn, O. Treutler, H. Öhm, M. Häser and R. Ahlrichs, *Chem. Phys. Lett.*, 1995, **240**, 283–290.
- (S9) M. Sierka, A. Hogekamp and R. Ahlrichs, *J. Chem. Phys.*, 2003, **118**, 9136–9148.
- (S10) A. Klamt and G. J. Schuurmann, *Chem. Soc., Perkin Trans.*, 1993, **2**, 799–805.
- (S11) K. Fukui, *Acc. Chem. Res.* 1981, **14**, 363–368.
- (S12) M. Mammen, E. I. Shakhnovich, J. M. Deutch and G. M. Whitesides, *J. Org. Chem.*, 1998, **63**, 3821–3830.
- (S13) S. Kozuch and J. M. L. Martin, *ACS Catal.*, 2011, **1**, 246–253.
- (S14) A. Uhe, S. Kozuch and S. Shaik, *Comput. Chem.*, 2010, **32**, 978.
- (S15) S. Kozuch, *WIREs Comput. Mol. Sci.*, 2012, **2**, 795–815.
- (S16) S. Kozuch and S. Shaik, *Acc. Chem. Res.*, 2010, **44**, 101–110.

#### ❖ The XYZ coordinates of the optimized structures discussed in the manuscript

The optimized geometries of the structures reported in the manuscript (the atomic symbol followed by the three Cartesian coordinates, in Å).

|       |            |            |            |           |           |            |            |           |            |            |            |
|-------|------------|------------|------------|-----------|-----------|------------|------------|-----------|------------|------------|------------|
| Int_1 |            |            | H          | 5.8279677 | 9.3919784 | 1.1644732  | C          | 6.8987630 | 11.5028120 | 2.8076985  |            |
| P     | 4.8178000  | 9.5602086  | 3.4010279  | C         | 6.6880395 | 7.7697315  | 2.3010177  | H         | 6.1371121  | 12.1283238 | 2.3111811  |
| P     | 1.2154317  | 9.6256753  | 7.5492842  | H         | 7.5018517 | 8.3937568  | 2.7031737  | H         | 7.3083623  | 10.8283531 | 2.0389762  |
| Mg    | 3.2896158  | 8.9168997  | 5.7568746  | H         | 6.3856680 | 7.0879777  | 3.1154826  | C         | -0.1678834 | 8.6923889  | 8.4053545  |
| N     | 2.2276433  | 10.4568252 | 4.7829818  | C         | 7.2019864 | 6.9456709  | 1.1120674  | H         | -0.8722996 | 9.4192696  | 8.8478247  |
| C     | 3.5716435  | 10.7165680 | 2.6935821  | H         | 7.6108523 | 7.6310824  | 0.3479727  | C         | -0.9188978 | 7.8524416  | 7.3581970  |
| C     | 3.6030987  | 11.3342532 | 1.4391512  | H         | 8.0357562 | 6.3022800  | 1.4362973  | H         | -0.1842276 | 7.2276821  | 6.8201678  |
| H     | 4.4417284  | 11.1412704 | 0.7645274  | C         | 6.0849992 | 6.1035115  | 0.4854074  | H         | -1.3725090 | 8.5128292  | 6.6033566  |
| C     | 2.5783069  | 12.2053990 | 0.9959751  | H         | 5.7428180 | 5.3502248  | 1.2189271  | C         | -1.9828693 | 6.9515452  | 7.9949772  |
| C     | 1.4882176  | 12.4634105 | 1.8363046  | H         | 6.4678788 | 5.5442996  | -0.3830850 | H         | -2.7799865 | 7.5815011  | 8.4289991  |
| H     | 0.6940505  | 13.1359219 | 1.4983053  | C         | 4.8968733 | 6.9819437  | 0.0749611  | H         | -2.4610877 | 6.3333329  | 7.2177841  |
| C     | 1.4139534  | 11.8571983 | 3.0992969  | H         | 4.0831743 | 6.3642485  | -0.3376487 | C         | -1.3843633 | 6.0668152  | 9.0941607  |
| C     | 2.4618285  | 10.9754575 | 3.5261230  | H         | 5.2127315 | 7.6680832  | -0.7309298 | H         | -2.1681214 | 5.4482907  | 9.5595946  |
| C     | 1.0204618  | 10.9969031 | 5.1793165  | C         | 4.3729510 | 7.8045160  | 1.2586744  | H         | -0.6572822 | 5.3661588  | 8.6424926  |
| C     | 0.4654137  | 11.8707230 | 4.1866599  | H         | 3.5445809 | 8.4557334  | 0.9413501  | C         | -0.6740212 | 6.9155984  | 10.1546029 |
| C     | -0.7695674 | 12.4921348 | 4.4242151  | H         | 3.9551785 | 7.1167611  | 2.0153890  | H         | -0.2213010 | 6.2721794  | 10.9261676 |
| H     | -1.2066698 | 13.1573837 | 3.6734292  | C         | 6.2273803 | 10.7030122 | 3.9305608  | H         | -1.4183652 | 7.5493756  | 10.6695051 |
| C     | -1.4562389 | 12.2589449 | 5.6222308  | H         | 6.9698067 | 10.0181903 | 4.3821342  | C         | 0.4037698  | 7.8110051  | 9.5289523  |
| C     | -0.8839921 | 11.4604753 | 6.5919600  | C         | 5.7130646 | 11.6383896 | 5.0398650  | H         | 1.2097621  | 7.1770393  | 9.1167701  |
| H     | -1.4372503 | 11.2289964 | 7.5197071  | H         | 4.8983866 | 12.2629764 | 4.6344474  | H         | 0.8696158  | 8.4373070  | 10.3061783 |
| C     | 0.3482669  | 10.7681622 | 6.3986279  | H         | 5.2783926 | 11.0450440 | 5.8589254  | C         | 1.9361523  | 10.7672786 | 8.8685931  |
| C     | 2.6764061  | 12.8399238 | -0.3715437 | C         | 6.8278492 | 12.5417121 | 5.5808722  | H         | 2.4544024  | 10.0781521 | 9.5621028  |
| H     | 3.5974179  | 13.4355497 | -0.4768238 | H         | 6.4167760 | 13.2216492 | 6.3452614  | C         | 0.9190125  | 11.6036620 | 9.6561145  |
| H     | 1.8240602  | 13.5067762 | -0.5627205 | H         | 7.5867823 | 11.9190966 | 6.0880681  | H         | 0.3515512  | 12.2329010 | 8.9488224  |
| H     | 2.6919169  | 12.0805113 | -1.1703679 | C         | 7.4951059 | 13.3388710 | 4.4546268  | H         | 0.1877111  | 10.9533969 | 10.1627075 |
| C     | -2.7962046 | 12.9026253 | 5.8907484  | H         | 6.7562746 | 14.0353572 | 4.0181360  | C         | 1.6148701  | 12.5050628 | 10.6877230 |
| H     | -3.0755139 | 13.5916643 | 5.0814007  | H         | 8.3159192 | 13.9567976 | 4.8526722  | H         | 2.1023501  | 11.8730371 | 11.4520615 |
| H     | -2.7900815 | 13.4752711 | 6.8319704  | C         | 8.0151480 | 12.4056944 | 3.3548212  | H         | 0.8645984  | 13.1158606 | 11.2160091 |
| H     | -3.5966556 | 12.1497027 | 5.9787259  | H         | 8.8234204 | 11.7739911 | 3.7660343  | C         | 2.6685806  | 13.4026714 | 10.0285999 |
| C     | 5.4870376  | 8.6453429  | 1.9031690  | H         | 8.4589378 | 12.9895578 | 2.5319976  | H         | 2.1654283  | 14.1026233 | 9.3371018  |

H 3.1771758 14.0183926 10.7877682  
C 3.6892563 12.5690474 9.2446137  
H 4.4154625 13.2246160 8.7365580  
H 4.2674689 11.9424494 9.9474886  
C 3.0012665 11.6652191 8.2140195  
H 3.7500760 11.0432624 7.6986783  
H 2.5203296 12.2881931 7.4399134  
C 4.8738456 8.4513326 7.1492775  
H 4.4914844 8.0006897 8.0842316  
H 5.4322011 9.3546690 7.4576489  
H 5.6342005 7.7592611 6.7427687  
H 0.4774000 3.9328895 5.8529476  
H 2.5065173 2.9625922 4.4749544  
H 1.4014785 3.1903433 3.0992063  
H -0.3905891 4.2742462 4.3338136  
C 2.1925348 3.6697639 3.6936617  
C 0.3388882 4.6719238 5.0520503  
H 2.7884896 4.4749183 6.9353521  
H 3.0459439 3.8692931 3.0346569  
C 1.6529037 4.9474891 4.3210202  
H -0.0791447 5.5890068 5.4882550  
C 2.5912639 5.5279251 6.6886424  
H 1.5972350 5.7958743 7.0642486  
H 4.5094151 4.5457664 4.9783059  
C 2.7047756 5.7359375 5.1875128  
O 1.3339278 5.8977225 3.2357929  
H 3.3358845 6.1496379 7.2041060  
C 4.1468100 5.5507716 4.7239759  
H 4.2475824 5.6958894 3.6401787  
B 1.6483077 7.1531704 3.6688420  
O 2.3426642 7.1583802 4.8788216  
H 4.7825824 6.2886787 5.2313889  
H 1.3689984 8.1568554 3.0907910

### Int\_2

P 3.1014570 8.7654736 2.9621173  
P 2.0487475 8.3541442 8.3533300  
Mg 2.9887732 7.9486135 5.6938604  
N 1.7655554 9.6494479 5.5821933  
C 1.9805724 10.2138278 3.1522358  
C 1.5382190 11.0932417 2.1582643  
H 1.8753828 10.9552807 1.1288658  
C 0.6587886 12.1683271 2.4263601  
C 0.1785350 12.3507683 3.7277033  
H -0.5106064 13.1737114 3.9400633  
C 0.5768299 11.4785397 4.7501400  
C 1.4907651 10.4112602 4.4624136  
C 1.0372280 10.2209032 6.6042060  
C 0.2746787 11.3517673 6.1539515  
C -0.5322399 12.0523469 7.0607568  
H -1.1134232 12.9178845 6.7286075  
C -0.6028648 11.6448464 8.3984346  
C 0.1528885 10.5248941 8.8202748  
H 0.0669647 10.2140106 9.8638838  
C 0.9876863 9.8077003 7.9547821  
C 0.2826169 13.1229224 1.3185812  
H 1.0877876 13.8533298 1.1333400  
H -0.6253630 13.6902151 1.5689371  
H 0.1014000 12.5929564 0.3709938  
C -1.4596150 12.3885914 9.3955136  
H -2.0755187 13.1514146 8.8989988  
H -0.8457983 12.8999159 10.1552555  
H -2.1374010 11.7083425 9.9351003  
C 2.1388139 7.6197271 1.8253118  
H 1.9359685 8.1596109 0.8823107  
C 2.9628719 6.3575035 1.5229039  
H 3.9038613 6.6211979 1.0127139  
H 3.2423680 5.8803210 2.4788966  
C 2.1674665 5.3578543 0.6705635  
H 1.9751627 5.8003806 0.3237403  
H 2.7698013 4.4506120 0.5012918  
C 0.8313711 4.9993173 1.3320185  
H 1.0295960 4.4682247 2.2807206  
H 0.2619212 4.3054298 0.6929702  
C 0.0061864 6.2580145 1.6244690  
H -0.9341590 5.9927008 2.1341860  
H -0.2770032 6.7384223 0.6701883  
C 0.7942105 7.2592282 2.4796402  
H 0.2032110 8.1721540 2.6490331  
H 0.9874469 6.8152261 3.4727326

C 4.5855643 9.3278682 1.9388563  
H 5.2698140 8.4605099 2.0133996  
C 5.2645284 10.5231731 2.6266506  
H 4.5849777 11.3907579 2.6091980  
H 5.4380976 10.3006521 3.6918553  
C 6.5904747 10.8853724 1.9464332  
H 7.0320582 11.7661866 2.4386507  
H 7.3087530 10.0543750 2.0792917  
C 6.3950937 11.1472648 0.4477901  
H 5.7733398 12.0508488 0.3194967  
H 7.3634627 11.3577774 -0.0343108  
C 5.7034972 9.4622381 -0.2375109  
H 6.3666371 9.0788152 -0.1987615  
H 5.5325752 10.1811574 -1.3039838  
C 4.3701378 9.6184800 0.4452088  
H 3.6838236 10.4728646 0.3318611  
H 3.9003719 8.7604572 -0.0593096  
C 0.8228736 7.0432876 8.9039504  
H 0.2317515 7.4460894 9.7459614  
C -0.1309098 6.7314668 7.7360622  
H 0.4682847 6.4293191 6.8585023  
H -0.6814561 7.6405718 7.4486563  
C -1.1055720 5.6015298 8.0952487  
H -1.7721682 5.9398861 8.9089587  
H -1.7508841 5.3790968 7.2303981  
C -0.3574153 4.3460024 8.5451690  
H -1.0706182 3.5494159 8.8260732  
H 0.2344181 3.9506365 7.6976131  
C 0.5859967 6.4647936 9.7150850  
H 1.1470058 7.3450465 10.0057604  
H -0.0108539 4.9479479 10.5954160  
C 1.5661079 5.7766674 9.3613718  
H 2.2281804 5.4414527 8.5442571  
H 2.2145740 5.9955175 10.2252484  
C 3.0221035 8.8103040 9.9101213  
H 3.7774158 8.0029345 9.7020962  
C 2.2645117 8.8474422 11.2466448  
H 1.4890433 9.6302291 11.2076753  
H 1.7453979 7.8947992 11.4313157  
C 3.2205624 9.1586813 12.4095061  
H 3.9508163 8.3350777 12.5080898  
H 2.6578306 9.1957107 13.3561040  
C 3.9705692 10.4768413 12.1802405  
H 3.2447936 11.3103378 12.1812409  
H 4.6725162 10.6689358 13.0069909  
C 4.7160553 10.4621344 10.8403323  
H 5.2094401 11.4311014 10.6602248  
H 5.5190046 9.7034936 10.8829801  
C 3.7684376 10.1349505 9.6783865  
H 4.3205975 10.0985720 8.7251409  
H 3.0255909 10.9433495 9.5707840  
H 5.6712364 7.1631667 8.1760899  
H 4.4416268 9.1872730 8.7684412  
O 6.9437297 8.7802617 6.1836766  
H 5.2631873 6.1476389 6.7733236  
C 6.0158269 6.8310523 7.1894760  
B 5.2749053 10.1316656 6.1588459  
C 7.4115494 9.1278190 8.2585888  
H 7.9427356 8.2372210 8.6206566  
C 6.2206568 8.0010840 6.2398439  
H 6.9580992 6.2776875 7.3118223  
H 7.9961470 10.1065042 8.5320683  
C 7.2462863 9.0935232 6.7398734  
O 6.6011665 10.3692886 6.3654646  
H 5.6211816 6.9049810 4.4893042  
C 6.4803618 7.5054533 4.8200215  
H 6.6126420 8.3372767 4.1160324  
C 8.6053331 9.0337104 6.0564042  
H 7.3773094 6.8727542 4.7882916  
H 9.0934776 8.0684629 6.2550513  
H 9.2486354 9.8302736 6.4540915  
H 8.5203026 9.1689803 4.9717399  
C 2.9536171 5.7960638 5.4981114  
N 3.2382693 13.8399806 6.2264752  
H 2.6638631 13.9586317 8.2159193  
C 3.0755364 13.2214877 7.5152052  
H 2.3847440 12.3689007 7.4568390  
H 4.0463054 12.8769442 7.9022780  
C 3.5078916 13.6036340 5.0772434  
O 3.7701509 13.5231691 3.9216159

H 1.9791065 5.4441850 5.1124941  
H 3.1091192 5.2652447 6.4550515  
H 3.7126068 5.4087566 4.7924705  
H 4.4568533 10.9782040 5.9829143

### TS\_1

P 1.6811986 9.4868652 5.0714655  
P 3.8413383 7.5604577 9.7289483  
Mg 3.4891269 8.3360939 7.0219821  
N 2.0890601 9.4781187 8.1113705  
C 0.8507153 10.6283073 6.2608130  
C -0.0756023 11.6405399 5.9928415  
H -0.3769470 11.8338019 4.9621511  
C -0.6530147 12.4417549 7.0078269  
C -0.3135166 12.2044789 8.3428787  
H -0.7660838 12.8109994 9.1331603  
C 0.6048672 11.1934981 8.6616681  
C 1.2018751 10.4135286 7.6157096  
C 2.0671460 9.6390810 9.4816817  
C 1.1742252 10.6879620 9.8854399  
C 1.0419838 11.0063990 11.2451079  
H 0.3696212 11.8097228 11.5615726  
C 1.7636282 10.2903007 12.2068764  
C 2.6151690 9.2381361 11.7901810  
H 3.1461451 8.6754695 12.5607591  
C 2.7892999 8.8941438 10.4449499  
C -1.6065378 13.5504848 6.6307180  
H -1.0712888 14.4039880 6.1821862  
H -2.1500001 13.9259327 7.5092111  
H -2.3496034 13.2125253 5.8919001  
C 1.6460083 10.6193912 13.6764886  
H 0.8605856 11.3670865 13.8555766  
H 2.5891923 11.0247369 14.0784359  
H 1.4005143 9.7261140 14.2725768  
C 0.3423610 8.1925570 4.7559892  
H -0.5407159 8.7146371 4.3462649  
C 0.8423165 7.1516649 3.7388764  
H 1.0791375 7.6314160 2.7750854  
H 1.7819556 6.7138002 4.1149857  
C -0.1885044 6.0332953 3.5219803  
H -1.0933152 6.4579829 3.0507687  
H 0.2149827 5.2881579 2.8172175  
C -0.5769704 5.3642469 4.8462303  
H 0.3095129 4.8581598 5.2695594  
H -1.3362041 4.5847384 4.6736713  
C -1.0899489 6.4008769 5.8527539  
H -1.3272669 5.9192391 6.8158079  
H -2.0320293 6.8397369 5.8788011  
C -0.0624790 7.5179930 6.0765499  
H -0.4524275 8.2662301 6.7827048  
H 0.8376239 7.0848657 6.5439084  
C 1.8481771 10.3612656 3.4018902  
H 2.4846332 9.6481513 2.8429972  
C 2.6503179 11.6656381 3.5439178  
H 2.0717646 12.3857487 4.1472257  
H 3.5814471 11.4762794 4.1002324  
C 2.9729260 12.2806078 2.1753275  
H 3.5092540 13.2334087 2.3127759  
H 3.6594605 11.6077353 1.6300157  
C 1.7062270 12.4927252 1.3392576  
H 1.0687450 13.2494454 1.8317343  
H 1.9639379 12.8954466 0.3465046  
C 0.9158172 11.1870390 1.1977506  
H 1.5153616 10.4581586 0.6228000  
H -0.0100197 11.3554490 0.6239875  
C 0.5741828 10.5852845 2.5695192  
H -0.1059871 11.2726601 3.0972384  
H 0.0230811 9.6428567 2.4343971  
C 2.8613111 5.9951207 10.1002452  
H 2.7222417 5.9296187 11.1939753  
C 1.4806611 6.0854383 9.4293637  
H 1.6256741 6.2562498 8.3489515  
H 0.9264551 6.9555155 9.8125912  
C 0.6688120 4.7985395 9.6252846  
H 0.4363255 4.6721775 10.6981232  
H -0.2969730 4.8880573 9.1016159  
C 1.4388459 3.5712745 9.1244211  
H 0.8570074 2.6524364 9.3011855  
H 1.5796288 3.6540574 8.0318832  
C 2.8120404 3.4723271 9.8003345

|                    |            |            |            |   |            |            |            |    |            |            |            |
|--------------------|------------|------------|------------|---|------------|------------|------------|----|------------|------------|------------|
| H                  | 3.3748506  | 2.6109751  | 9.4056147  | H | 4.6954113  | 13.7088114 | 9.2433011  | C  | 2.8215059  | 11.4712675 | 13.2299363 |
| H                  | 2.6732211  | 3.2914398  | 10.8817185 | H | 4.7661272  | 12.1526418 | 10.1131434 | C  | 3.7166141  | 10.4536791 | 12.8254897 |
| C                  | 3.6287896  | 4.7584754  | 9.6020959  | H | 7.9733187  | 9.7368324  | 8.3576553  | H  | 4.4616650  | 10.1142456 | 13.5480164 |
| H                  | 3.8482509  | 4.8880659  | 8.5284732  | C | 8.3560360  | 9.8328734  | 7.3336385  | C  | 3.6658555  | 9.8611168  | 11.5568206 |
| H                  | 4.5995993  | 4.6681468  | 10.1156198 | H | 9.0088721  | 10.7151888 | 7.2960310  | H  | 4.3549755  | 5.7346591  | 8.3619854  |
| C                  | 5.3996253  | 7.4086490  | 10.7792990 | H | 8.9581500  | 8.9446560  | 7.1020000  | C  | 3.5107218  | 6.2779751  | 7.9017320  |
| H                  | 6.0329093  | 6.7528330  | 10.1515290 | H | 8.2482500  | 9.2185503  | 4.5916031  | Mg | 3.4767438  | 8.4006271  | 8.3404032  |
| C                  | 5.3064775  | 6.7597270  | 12.1704241 | H | 8.5735677  | 10.9370177 | 4.9163774  | N  | 2.3946432  | 9.8378434  | 9.3963031  |
| H                  | 4.6830189  | 7.3813930  | 12.8330149 | C | 7.7925170  | 10.1645321 | 4.9176511  | C  | 2.6561700  | 10.3022082 | 10.6700443 |
| H                  | 4.8219683  | 5.7732555  | 12.1142096 | H | 7.0216491  | 10.4510769 | 4.1926879  | C  | 1.7214123  | 11.3145632 | 11.0719230 |
| C                  | 6.7074344  | 6.6194517  | 12.7893060 | H | 7.3451902  | 7.2000604  | 6.4717436  | C  | 1.8227756  | 11.8934456 | 12.3433878 |
| H                  | 7.3010920  | 5.9176555  | 12.1764309 | C | 7.2244788  | 10.0191128 | 6.3234526  | H  | 1.1166634  | 12.6693664 | 12.6542917 |
| H                  | 6.6302592  | 6.1732259  | 13.7938338 | O | 5.0911565  | 9.6107092  | 7.3562525  | H  | 3.5433413  | 6.0679145  | 6.8161869  |
| C                  | 7.4339891  | 7.9696711  | 12.8600290 | O | 6.5482910  | 11.2726519 | 6.6856110  | H  | 2.5951666  | 5.7828569  | 8.2741765  |
| H                  | 6.8931418  | 8.6330512  | 13.5586882 | C | 6.0767688  | 8.9379272  | 6.4391258  | C  | 1.2873439  | 10.5442114 | 8.9635300  |
| H                  | 8.4475673  | 7.8376330  | 13.2710590 | C | 6.5331485  | 7.6339711  | 7.0725604  | C  | 0.8239330  | 11.4693537 | 9.9549804  |
| C                  | 7.4998619  | 8.6437810  | 11.4827062 | H | 6.8961796  | 7.7847522  | 8.0966399  | C  | -0.3086802 | 12.2538334 | 9.7052372  |
| H                  | 7.9708139  | 9.6371256  | 11.5619553 | H | 5.7048376  | 6.9164671  | 7.1066500  | H  | -0.6706328 | 12.9584885 | 10.4559946 |
| H                  | 8.1386484  | 8.0436583  | 10.8100179 | C | 5.3158412  | 8.6763076  | 5.1433667  | C  | -0.9930878 | 12.1278489 | 8.4915350  |
| C                  | 6.1015604  | 8.7729855  | 10.8652445 | H | 4.9853587  | 9.6091888  | 4.6669820  | C  | -2.2149957 | 12.9648300 | 8.1963073  |
| H                  | 6.1560057  | 9.2250682  | 9.8627822  | H | 4.4267918  | 8.0700481  | 5.3704879  | H  | -1.9948041 | 13.7571889 | 7.4622011  |
| H                  | 5.4893336  | 9.4518015  | 11.4830476 | H | 5.9381595  | 8.1181984  | 4.4311014  | H  | -3.0311644 | 12.3544973 | 7.7787372  |
| H                  | 6.9902853  | 8.1750176  | 7.8880231  | O | 2.8221221  | 13.4842303 | 7.7986767  | H  | -2.5918077 | 13.4527848 | 9.1062973  |
| H                  | 7.2249644  | 10.4155540 | 8.6464539  | C | 6.9649261  | 10.1931444 | 11.0204889 | C  | -0.5305751 | 11.1977959 | 7.5314403  |
| O                  | 5.0957247  | 9.7591567  | 6.9184669  | H | 6.3977831  | 10.9616487 | 11.5719841 | H  | -1.1057585 | 11.0907181 | 6.6103255  |
| H                  | 6.2225860  | 7.2740204  | 6.5579400  | H | 6.7219367  | 10.3401013 | 9.9557806  | C  | 0.6042626  | 10.4033436 | 7.7327960  |
| C                  | 6.8925286  | 8.1105942  | 6.7975258  | C | 8.4672498  | 10.3906529 | 11.2637162 | P  | 1.2434753  | 9.5050918  | 6.6563854  |
| B                  | 4.9952531  | 11.2225046 | 6.8474117  | H | 9.0354964  | 9.6852252  | 10.6299875 | H  | 1.4796291  | 11.6509550 | 5.0613365  |
| C                  | 7.9378308  | 10.6322358 | 7.8405558  | H | 8.7678792  | 11.4045980 | 10.9543669 | C  | 1.9125084  | 10.7858442 | 4.5299831  |
| H                  | 8.7390471  | 9.8801266  | 7.8749386  | C | 8.8288023  | 10.1482194 | 12.7349284 | H  | 2.9345251  | 10.6479291 | 4.9811114  |
| C                  | 6.3463159  | 9.4038384  | 6.2082607  | H | 8.3544899  | 10.9289503 | 13.3560656 | C  | 1.9643272  | 11.0844532 | 3.0258159  |
| H                  | 7.8814542  | 7.9237255  | 6.3678725  | H | 9.9163365  | 10.2447223 | 12.8830352 | H  | 2.5392665  | 12.0079092 | 2.8498949  |
| H                  | 8.3813686  | 11.6191966 | 8.0316907  | C | 8.3453221  | 8.7706498  | 13.2056437 | H  | 2.5068789  | 10.2692308 | 2.5140784  |
| C                  | 7.2389871  | 10.6676140 | 6.4757176  | H | 8.8961564  | 7.9838558  | 12.6591776 | C  | 0.5563764  | 11.2063740 | 2.4316608  |
| O                  | 6.2768367  | 11.7489107 | 6.4869325  | H | 8.5712184  | 8.6290157  | 14.2747206 | H  | 0.6121555  | 11.3761354 | 1.3446279  |
| H                  | 5.2116597  | 8.4565317  | 4.6378182  | C | 6.8377545  | 8.5887574  | 12.9636780 | H  | 1.1871514  | 6.1052958  | 6.2740688  |
| C                  | 5.9990158  | 9.2190388  | 4.7284803  | H | 6.2901684  | 9.3201709  | 13.5792906 | H  | 0.1654070  | 9.0851840  | 2.2274368  |
| H                  | 5.6301003  | 10.1546537 | 4.2859814  | H | 6.5211445  | 7.5905752  | 13.3006229 | C  | -0.2805391 | 9.9581766  | 2.7375694  |
| C                  | 8.2642764  | 10.9389739 | 5.3780387  | H | 7.0635323  | 8.0517795  | 10.8966917 | H  | -0.6173677 | 4.5268385  | 5.6219083  |
| H                  | 6.8726270  | 8.8776886  | 4.1560753  | C | 6.4968563  | 8.8039203  | 11.4794275 | C  | -0.8664753 | 5.4123093  | 6.2291925  |
| H                  | 8.9588148  | 10.0922473 | 5.2719492  | P | 4.7207387  | 8.4979214  | 10.9069934 | H  | -1.8448156 | 5.7783030  | 5.8684506  |
| H                  | 8.8508112  | 11.8311358 | 5.6383716  | C | 4.1543898  | 7.0086361  | 11.9096103 | C  | -0.9847593 | 5.0316669  | 7.7099685  |
| H                  | 7.7762396  | 11.1200591 | 4.4128499  | H | 4.2830122  | 7.2490289  | 12.9805341 | H  | -0.0353802 | 4.5736685  | 8.0418087  |
| C                  | 3.7564412  | 6.4004485  | 6.0844093  | C | 4.9984668  | 5.7726890  | 11.5556043 | H  | -1.3006724 | 10.0712366 | 2.3368205  |
| H                  | 4.0739477  | 11.6560947 | 6.0588455  | H | 4.9430843  | 5.6083091  | 10.4658460 | H  | -1.7690915 | 4.2700309  | 7.8479622  |
| N                  | 4.3350410  | 11.9001963 | 8.1321779  | H | 6.0599388  | 5.9430579  | 11.7977681 | C  | -1.2770809 | 6.2641604  | 8.5732625  |
| H                  | 4.3577781  | 11.0779687 | 10.0623298 | C | 4.4923556  | 4.5180761  | 12.2828509 | H  | -2.2727410 | 6.6655319  | 8.3105264  |
| C                  | 4.6383785  | 12.0162894 | 9.5698577  | H | 5.0939930  | 6.6455641  | 11.9807194 | H  | -1.3207937 | 5.9874200  | 9.6391985  |
| H                  | 5.7152955  | 12.1977984 | 9.6768170  | H | 4.6403440  | 4.6435054  | 13.3707645 | H  | -0.4704577 | 8.2496062  | 8.9630060  |
| H                  | 4.0743651  | 12.8428242 | 10.0160152 | C | 3.0057728  | 4.2693188  | 12.0001679 | C  | -0.2217486 | 7.3584079  | 8.3672974  |
| C                  | 3.4892561  | 12.6111534 | 7.4976207  | H | 2.8748512  | 4.0502488  | 10.9252951 | H  | 0.7535071  | 6.9959421  | 8.7342822  |
| O                  | 2.7033806  | 13.4161443 | 7.1802616  | H | 2.6542785  | 3.3822050  | 12.5512226 | C  | -0.0933138 | 7.7388483  | 6.8822194  |
| H                  | 2.8463430  | 5.7797420  | 6.1820466  | H | 2.2164125  | 5.6628750  | 13.4589172 | H  | -1.0476554 | 8.1958187  | 6.5630866  |
| H                  | 4.5727223  | 5.8111848  | 6.5415186  | C | 2.1641245  | 5.4974766  | 12.3676296 | C  | 0.1920808  | 6.5038482  | 6.0129768  |
| H                  | 3.9719408  | 6.4573916  | 5.0017787  | H | 1.1029951  | 5.3246942  | 12.1249617 | C  | -0.3435446 | 9.6822965  | 4.2481481  |
| <b>Int_3</b>       |            |            |            | H | 2.0686035  | 7.6327639  | 11.9331999 | C  | 1.0698631  | 9.5380945  | 4.8366604  |
| B                  | 5.3953022  | 10.9754141 | 7.3593221  | H | 2.5141205  | 6.6185614  | 10.5528518 | H  | 1.5556013  | 8.6815204  | 4.3301501  |
| H                  | 3.1668902  | 11.9321497 | 6.5133944  | C | 2.6611120  | 6.7530088  | 11.6391135 | H  | -0.9436336 | 8.7803788  | 4.4397563  |
| C                  | 3.4549146  | 12.5061691 | 7.4167462  | C | 2.9601573  | 12.0939871 | 14.5994632 | H  | 0.2296181  | 6.7786647  | 4.9463338  |
| N                  | 4.5953500  | 12.0169951 | 8.0074394  | H | 2.0382707  | 12.6141473 | 14.8962381 | H  | -0.8633852 | 10.5212127 | 4.7366140  |
| H                  | 6.1973164  | 12.7275057 | 9.1946090  | H | 3.1826993  | 11.3367805 | 15.3666918 | H  | 0.0571824  | 12.0912940 | 2.8655668  |
| C                  | 5.1005547  | 12.6902296 | 9.2140107  | H | 3.7781337  | 12.8334880 | 14.6285956 | H  | 8.0395557  | 6.2762984  | 1.6161167  |
| <b>Mg_Catalyst</b> |            |            |            | C | -0.9485958 | 11.3582648 | 6.4942664  | C  | 6.0616862  | 6.0062180  | 0.7434471  |
| P                  | 4.8514862  | 9.6339260  | 3.4611660  | H | -1.5267120 | 11.1623843 | 7.4018684  | H  | 5.7516539  | 5.3010355  | 1.5358636  |
| P                  | 1.1771719  | 9.6324486  | 7.5001443  | C | 0.3131400  | 10.7746667 | 6.3418899  | H  | 6.4190806  | 5.3947355  | -0.1006206 |
| Mg                 | 3.2934492  | 8.9557077  | 5.7286529  | C | 2.7215059  | 12.8197047 | -0.4087976 | C  | 4.8523267  | 6.8487694  | 0.3198531  |
| N                  | 2.2501972  | 10.5392298 | 4.7868621  | H | 3.6891797  | 13.3232128 | -0.5609267 | H  | 4.0297487  | 6.1993665  | -0.0215153 |
| C                  | 3.6175649  | 10.7803228 | 2.7134254  | H | 1.9277375  | 13.5608509 | -0.5774583 | H  | 5.1321001  | 7.4814725  | -0.5414213 |
| C                  | 3.6540947  | 11.3701229 | 1.4454755  | H | 2.6308635  | 12.0518496 | -1.1949511 | C  | 4.3665710  | 7.4466357  | 1.4665654  |
| H                  | 4.5031643  | 11.1746836 | 0.7845736  | C | -2.8933391 | 12.7882699 | 5.7323916  | H  | 3.5200612  | 8.3671931  | 1.1370458  |
| C                  | 2.6214660  | 12.2169836 | 0.9729481  | H | -3.1524227 | 13.5050315 | 4.9405646  | H  | 3.9937387  | 7.1108184  | 2.2917828  |
| C                  | 1.5138708  | 12.4718494 | 1.7920798  | H | -2.9540876 | 13.3163601 | 6.6970634  | C  | 6.2766737  | 10.7615396 | 3.9650621  |
| H                  | 0.7118724  | 13.1208624 | 1.4270278  | C | 5.4959775  | 8.6380479  | 2.0066909  | H  | 7.0321388  | 10.0662520 | 4.3770352  |
| C                  | 1.4306785  | 11.8901967 | 3.0661437  | H | 5.8069331  | 9.3344299  | 1.2082206  | C  | 5.7975057  | 11.6688822 | 5.1136936  |
| C                  | 2.4938361  | 11.0431426 | 3.5271606  | C | 6.7115210  | 7.7932164  | 2.4248488  | H  | 4.9668074  | 12.2997344 | 4.7524665  |
| C                  | 1.0164961  | 10.0396767 | 5.1468333  | H | 7.5355965  | 8.4426106  | 2.7593116  | H  | 5.3931418  | 11.0529336 | 5.9330655  |
| C                  | 0.4572556  | 11.8861475 | 4.1322776  | H | 6.4337262  | 7.1657704  | 3.2914730  | C  | 6.9289363  | 12.5630777 | 5.6360587  |
| C                  | -0.8078637 | 12.4591974 | 4.3311122  | C | 7.1921188  | 6.8937313  | 1.2716752  | H  | 6.5434619  | 13.2269134 | 6.4273526  |
| H                  | -1.2488311 | 13.1051161 | 3.5657190  | H | 7.5724109  | 7.5283920  | 0.4562637  | H  | 7.7040357  | 11.9305458 | 6.1050886  |
| C                  | -1.5208911 | 12.1984025 | 5.5077985  |   |            |            |            |    |            |            |            |

C 7.5603237 13.3838038 4.5057958  
H 6.8084608 14.0890558 4.1074396  
H 8.3930963 13.9936396 4.8913790  
C 8.0466076 12.4749494 3.3701532  
H 8.8669069 11.8347866 3.7423250  
H 8.4650101 13.0772523 2.5474047  
C 6.9124558 11.5847653 2.8390661  
H 6.1361272 12.2213732 2.3812775  
H 7.2938929 10.9254454 2.0426363  
C -0.2095353 8.6650590 8.3138284  
H -0.9630351 9.3739379 8.7011992  
C -0.8748212 7.7661489 7.2572536  
H -0.0978995 7.1241320 6.8035224  
H -1.2872959 8.3838239 6.4443404  
C -1.9675981 6.8813917 7.8687327  
H -2.7915201 7.5208755 8.2329866  
H -2.3978130 6.2276361 7.0924450  
C -1.4215074 6.0456821 9.0323478  
H -2.2250638 5.4410995 9.4824949  
H -0.6695044 5.3336772 8.6450417  
C -0.7676229 6.9389791 10.0925147  
H -0.3441042 6.3266477 10.9049773  
H -1.5404145 7.5812945 10.5521498  
C 0.3278039 7.8278242 9.4866588  
H 1.1583040 7.1928372 9.1266774  
H 0.7496615 8.4825267 10.2652969  
C 1.8505756 10.7708408 8.8454616  
H 2.3123944 10.0783809 9.5746021  
C 0.8126850 11.6409779 9.5645449  
H 0.2929332 12.2656556 8.8178367  
H 0.0441670 11.0125797 10.0433244  
C 1.4715853 12.5505945 10.6125234  
H 1.9079032 11.9269762 11.4138448  
H 0.7073347 13.1861123 11.0890309  
C 2.5740512 13.4146518 9.9891063  
H 1.2055516 14.1044637 9.2542084  
H 3.0515738 14.0418393 10.7590488  
C 3.6207934 12.5452171 9.2829869  
H 4.3867041 13.1755018 8.8019007  
H 4.1469502 11.9263654 10.0320297  
C 2.9747515 11.6290505 8.2363483  
H 3.7389462 10.9746321 7.7845530  
H 2.5585982 12.2418502 7.4177532  
O 2.2388714 7.4094826 4.7713406  
C 1.1880892 7.6220093 3.7741765  
C 4.7877020 8.2276476 7.0905986  
C 2.3906939 5.9869759 5.0518164  
C 0.8886251 6.2353578 3.2172726  
H 1.5702410 8.3362976 3.0338907  
C 1.1690354 5.3247702 4.4231355  
H 2.4621021 5.8662139 6.1417903  
H 3.3315058 5.6420980 4.5918305  
H 0.3202861 8.0674671 4.2848199  
H 1.5717704 5.9973511 2.3872915  
H -0.1424744 6.1547431 2.8485288  
H 0.3185836 5.3406206 5.1224487  
H 1.3628935 4.2813617 4.1413306  
H 4.3464194 7.8277842 8.0216852  
H 5.5220533 8.9957735 7.3951757  
H 5.3733682 7.4091144 6.6308301

**HBpin**

O 0.7535016 2.1134698 -0.7440536  
C 2.2111757 2.3543998 -0.7642582  
C 2.9205241 1.0612633 -0.3888722  
B 0.1713852 3.2716149 -0.2826452  
O 1.0623491 4.1989140 0.2062589  
C 2.3756868 3.5267809 0.2757450  
C 2.5343477 3.0401851 1.7177124  
C 3.4580583 4.5410427 -0.0684062  
C 2.5593024 2.7635403 -2.1972291  
H -1.0106619 3.4569356 -0.3042528  
H 3.6432317 2.8943794 -2.3231105  
H 2.2232804 1.9738932 -2.8833178  
H 2.0566834 3.6996482 -2.4791893  
H 3.4856590 5.3256612 0.7008136  
H 4.4441689 4.0546266 -0.0957087  
H 3.2736125 5.0179556 -1.0387277  
H 2.7336745 0.3011716 -1.1603115  
H 4.0066583 1.2240693 -0.3253823

H 2.5668545 0.6700016 0.5724599  
H 3.5211928 2.5841254 1.8793653  
H 2.4351018 3.8998233 2.3947908  
H 1.7594234 2.3063284 1.9796697

**Methyl Isocyanate**

C 17.2736936 10.5062113 16.2340583  
N 18.0558240 10.1763869 17.0876533  
O 16.5125855 10.9598867 15.4438212  
C 18.7457983 9.0248329 17.6074988  
H 18.0548964 8.1813759 17.7521357  
H 19.1934301 9.2823486 18.5751690  
H 19.5508820 8.7151477 16.9245237

**THF**

O -3.1411902 1.3550951 2.1278148  
C -4.2814500 1.4152382 1.2380810  
C -2.6916830 -0.0161296 2.2323940  
C -4.3638320 0.0514156 0.5489340  
H -4.1330159 2.2497732 0.5355099  
C -3.8049398 -0.8787189 1.6360421  
H -2.4878870 -0.2354758 3.2917748  
H -1.7505852 -0.1360081 1.6638743  
H -5.1927740 1.6163540 1.8309689  
H -3.7180402 0.0293402 -0.3424436  
H -5.3868136 -0.2045750 0.2409240  
H -4.5759754 -1.0908771 2.3925873  
H -3.4334837 -1.8345817 1.2418585

**MeBpin**

H 16.9017969 -5.4546332 9.7499799  
H 17.9680656 -3.4279764 10.1149146  
O 16.9998025 -4.0805523 7.4757290  
H 16.5226378 -6.5855621 8.4305312  
C 17.3305550 -6.0162222 8.9109334  
B 17.6926515 -2.9004727 7.2603250  
C 18.9726349 -3.8344394 9.9289679  
H 19.1265685 -4.7024043 10.5851834  
C 17.9823338 -5.0923421 7.8914068  
H 18.0654633 -6.7334477 9.3056884  
H 19.7093533 -3.0640554 10.1947683  
C 19.1565762 -4.2080188 8.4556719  
O 19.0107316 -2.9649298 7.6842511  
H 17.4559476 -6.2910484 6.1817974  
C 18.3667806 -5.8724837 6.6315621  
H 18.8465312 -5.2193025 5.8887380  
C 20.5523984 -4.7687848 8.2199629  
H 19.0506321 -6.7002321 6.8655005  
H 20.6666989 -5.7409693 8.7217684  
H 21.3013688 -4.0804938 8.6360049  
H 20.7620116 -4.8982038 7.1510532  
C 17.0518829 -1.6172868 6.6309466  
H 16.2069077 -1.8557339 5.9703798  
H 17.7927699 -1.0326218 6.0668796  
H 16.6694295 -0.9603124 7.4298959

**Int\_a**

B 2.8491632 3.5830579 -1.9374078  
H 2.6302764 2.8982224 -2.8942744  
Mg -0.0836016 0.4212731 0.3596591  
C 0.0800729 1.7393671 2.0531825  
O 2.2563070 4.8106024 -1.7536100  
O 3.7178001 3.2152912 -0.9408151  
C 2.6130428 5.2543888 -0.3870023  
C 2.8411628 6.7588066 -0.4172949  
H 3.5885204 7.0428074 -1.1680791  
H 3.1777715 7.1143208 0.5674829  
H 1.8980127 7.2685181 -0.6590826  
C 1.4244490 4.9069829 0.5081592  
H 1.2410384 3.8247949 0.5441147  
H 0.5235188 5.3978957 0.1143297  
H 1.5843293 5.2595965 1.5363666  
H 3.1558005 3.2932072 1.6560672  
H 4.9281529 3.3336320 1.4966436  
C 4.0082269 3.9211068 1.3697042  
H 4.0576826 4.7821953 2.0524208  
C 3.8985185 4.3949855 -0.0728121  
H 5.1416345 5.3970514 -1.5653163  
C 5.2018191 5.0589624 -0.5211538  
H 6.0170540 4.3261177 -0.4447978

H 5.4498111 5.9206898 0.1140640  
H -0.4518895 2.6925050 1.8795974  
H -0.3543087 1.3105948 2.9742495  
H 1.1303391 1.9897095 2.2920267  
C 0.2179256 -2.5183964 -0.6520100  
C -0.4478547 -3.6136677 -1.2949569  
H -0.2012179 -5.5640406 -2.2335755  
C 1.6844288 -4.7462490 -1.5592094  
C 0.2966310 -4.7165292 -1.7393497  
H 1.8722563 -6.6976964 -2.4797616  
C 2.5087406 -5.9177317 -2.0384887  
H 3.2410905 -5.6121364 -2.8032223  
H 3.0774824 -6.3769935 -1.2140519  
C 2.3210644 -3.6559190 -0.9186967  
H 3.4067280 -3.6956858 -1.7936291  
C 1.6160590 -2.5416948 -0.4523732  
H -1.8399074 -3.2402669 -1.3330263  
C -3.0104935 -3.8382953 -1.7393494  
H -2.9701092 -4.8205812 -2.3033050  
C -4.2384219 -3.1789501 -1.7011965  
C -5.5139908 -3.8381323 -2.2188862  
H -6.2341401 -3.9862288 -1.4053517  
H -6.0161019 -3.1477867 -2.9503159  
H -5.3151485 -4.7634871 -2.7118758  
C -4.2813803 -1.9119922 -1.0701507  
H -5.2525657 -1.4173735 -0.9794158  
C -3.1395010 -1.2808344 -0.5663127  
C -1.9027350 -1.9491137 -0.7104943  
N -0.6587262 -1.5102696 -0.2981775  
O 0.1341929 1.3789977 -1.5159489  
C -0.8841900 1.0283025 -3.6127123  
H -0.7138790 0.8104783 -4.6753556  
H -1.8053995 0.5197532 -3.2910813  
H -1.4990630 2.6118930 -1.1766477  
C -0.9511308 2.5337722 -3.3114596  
H -1.9351401 2.9720003 -3.5271379  
H 0.0286326 3.4678724 -1.5721823  
C -0.6069381 2.6098142 -1.8221275  
H -0.2007082 3.0761819 -3.9054626  
C 0.2795958 0.5906904 -2.7395506  
H 1.2520711 0.8352985 -3.1963355  
P -3.0648025 0.3517601 0.2856687  
H 0.2622470 -0.4662232 -2.4478143  
C -4.5585124 1.2808395 -0.3861503  
H -5.4537995 0.6559038 -0.2231262  
C -4.4206679 1.5337353 -1.8958613  
C -4.7481111 2.6052909 0.3727049  
H -4.8893085 2.4192354 1.4492871  
H -3.8272550 3.2095585 0.2785734  
C -3.4991060 2.1126645 -0.0788624  
C -5.9402892 3.4005046 -0.1787393  
H -6.8704442 2.8382890 0.0203029  
H -6.0303474 4.3586210 0.3577859  
H -4.3080834 0.5795644 -2.4324090  
C -5.6178918 2.3211674 -2.4439322  
H -6.5311097 1.7073136 -2.3458579  
H -5.4803025 2.5096795 -3.5210706  
C -5.8103237 3.6409650 -1.6878592  
H -4.9395411 4.2950028 -1.8763347  
H -6.6947244 4.1772669 -2.0675659  
H -5.7487331 0.1089004 1.8452212  
H -5.1199678 -1.5323947 1.6234431  
C -5.0112227 -0.6146897 2.2269715  
C -5.3229506 -0.9328252 3.6983958  
H -5.3124206 0.0061487 4.2806350  
H -6.3421576 -1.3443563 3.7819181  
H -4.5240395 -2.0912501 5.3595255  
H -4.3839063 -2.8804605 3.7804432  
C -4.3007774 -1.9068415 4.2961894  
C -2.8736657 -1.3730453 4.1308725  
H -2.1414361 -2.1002254 4.5186259  
H -2.7542681 -0.4535307 4.7314876  
H -2.5710753 -1.9959840 2.0759707  
C -2.5616093 -1.0606724 2.6622858  
H -1.5467166 -0.6462450 2.5737697  
C -3.5829996 -0.0801405 2.0600822  
H -3.4894979 0.8798006 2.6010797  
H 0.6519228 -1.0121113 2.7809464  
C 1.2888150 -1.9083058 2.8404293  
H 0.7603162 -2.7115737 2.2981020

C 1.4787878 -2.3187969 4.3069778  
H 1.8914061 -1.4635077 4.8716713  
H 4.4992498 -2.5499058 4.7568415  
H 1.9653376 -4.3982059 3.9590485  
H 2.5783277 -3.7735780 5.4983318  
C 2.4273658 -3.5161791 4.4375174  
H 4.4347169 -4.1052396 3.8274827  
C 3.7726230 -3.2267238 3.7609678  
H 4.2808661 -2.4058339 4.2985686  
H 3.1662056 -3.6829770 1.7314803  
C 3.5860878 -2.8276670 2.2884160  
H 4.5654982 -2.6019019 1.8365698  
H 3.0890404 -0.7494818 2.6351353  
C 2.6347802 -1.6324213 2.1485618  
P 2.3145926 -1.0538237 0.3776493  
C 4.0267762 -0.8726919 -0.3699526  
H 4.5309044 -1.8532417 -0.3075422  
H 4.9720550 -0.1471429 1.4608651  
C 4.8576079 0.1603859 0.4091011  
H 4.3205291 1.1221588 0.4053528  
C 6.2431028 -0.1471429 -0.2268766  
H 6.8210624 -0.5845715 -0.1248340  
H 6.8000571 1.1262423 0.3263155  
C 6.1402943 0.7287487 -1.7102704  
H 7.1461205 0.8110135 -2.1534955  
H 5.1900318 0.0185267 -3.5367180  
H 5.6647193 1.7204760 -1.7917316  
C 5.2991212 -0.2935730 -2.4852047  
H 5.8210514 -1.2675528 -2.4971990  
C 3.9127333 -0.4743042 -1.8512003  
H 3.3337808 -1.2318655 -2.4026701  
H 3.3547133 0.4745925 -1.9192516

**Int a'**

P 5.3434134 10.0433247 3.2464127  
P 1.1382869 9.0139977 7.2634468  
Mg 2.5912857 8.2164869 5.1974425  
N 2.3200202 10.2485155 4.6767243  
C 3.8339075 10.9785018 2.7867302  
C 3.8773198 11.8074719 1.6521388  
H 4.7466181 11.7591597 0.9946177  
C 2.8629982 12.7289727 1.3247816  
C 1.7687574 12.8520081 2.1894106  
H 0.9940691 13.5963949 1.9831210  
C 1.6635822 12.0192005 3.3065204  
C 2.6660677 11.0187884 3.5891485  
C 1.1355566 10.7932451 5.1532609  
C 0.6785606 11.8829212 4.3483296  
C -0.5113142 12.5463085 4.6756184  
H -0.8682814 13.3763667 4.0585754  
C -1.2477106 12.1559245 5.8002459  
C -0.7683659 11.0920348 6.5994601  
H -1.3479872 10.8063495 7.4820331  
C 0.4113356 10.4016613 6.3021863  
C 2.9688661 13.5616616 0.0696183  
H 4.0110269 13.8460282 -0.1400450  
H 2.3759432 14.4837498 0.1513834  
H 2.5984430 13.0111041 -0.8111392  
C -2.5439286 12.8412575 6.1602898  
H -2.6552654 13.7925811 5.6211133  
H -2.6019833 13.0548398 7.2386701  
H -3.4148730 12.2139433 5.9080511  
C 5.6050952 8.7924149 1.8858101  
H 5.6228530 9.3717022 0.9441296  
C 6.9356062 8.0322161 2.0311554  
H 7.7872278 8.7286355 1.9959703  
H 6.9771321 7.5584740 3.0237627  
C 7.0831032 6.9690328 0.9331377  
H 7.1668623 7.4712412 -0.0475401  
H 8.0220549 6.4125749 1.0834082  
C 5.8875331 6.0095059 0.9063254  
H 5.8609869 5.4331571 1.8481253  
H 6.0053740 5.2772491 0.0918242  
C 4.5681961 6.7747803 0.7485151  
H 3.7124924 6.0816221 0.7762913  
H 4.5466080 7.2669814 -0.2402431  
C 4.4015341 7.8343875 1.8446091  
H 3.4712045 8.4027820 1.6899162  
H 4.3016624 7.3298357 2.8195531  
C 6.8003192 11.2339525 3.2029776

H 7.5633395 10.6482554 3.7485070  
C 6.4975891 12.5017365 4.0237950  
H 5.7196286 13.0862608 3.5034461  
H 6.0893882 12.2338908 5.0085466  
C 7.7638041 13.3535728 4.1892915  
H 7.5195551 14.2728511 4.7454860  
H 8.4935428 12.7967540 4.8038215  
C 8.3974215 13.7000785 2.8371847  
H 7.7141399 14.3636408 2.2769226  
H 9.3328997 14.2633133 2.9843350  
C 8.6605088 12.4387382 2.0067988  
H 9.4243870 11.8188517 2.5096361  
H 9.0692751 12.7056873 1.0190589  
C 7.3782685 11.6109670 1.8284613  
H 6.6491279 12.2179071 1.2685063  
H 7.5881489 10.7191223 1.2198517  
C -0.3107042 8.0451275 7.9368435  
H -0.9565854 8.7316852 6.5125170  
C -1.1265048 7.4533750 6.7727103  
H -0.4588029 6.8394912 6.1432035  
H -1.5083245 8.2623130 6.1311216  
C -2.2834354 6.5871364 7.2892616  
H -3.0018803 7.2262263 7.8335254  
H -2.8294570 6.1524355 6.4369666  
C -1.7809605 5.4799198 8.2240918  
H -2.6269714 4.8902572 8.6116616  
H -1.1454604 4.7831068 7.6489020  
C -0.9648400 6.0637996 9.3841277  
H -0.5710054 5.2574325 10.0235197  
H -1.6252035 6.6790878 10.0208939  
C 0.1938618 6.9344602 8.8763583  
H 0.9125766 6.3007761 8.3252336  
H 0.7403830 7.3659712 9.7301376  
C 1.9750339 9.8211321 8.7406329  
H 2.4527192 8.9741349 9.2679590  
C 1.0445622 10.5517855 9.7164061  
H 0.5187398 11.3558881 9.1735621  
H 0.2723466 9.8701397 10.1073966  
C 1.8420556 11.1592149 10.8818013  
H 2.2851086 10.3418595 11.4795430  
H 1.1615454 11.7067898 11.5535664  
C 2.9608004 12.0825487 10.3830378  
H 2.5105699 12.9556433 9.8776710  
H 3.5399077 12.4741352 11.2347029  
C 3.8817789 11.3550225 9.3963161  
H 4.6509556 12.0412719 9.0064067  
H 4.4188764 10.5467819 9.9255283  
C 3.0861163 10.7553946 8.2310372  
H 3.7517266 10.2221470 7.5348815  
H 2.6258100 11.5693386 7.6443482  
H 4.4431211 7.5961394 8.1601439  
H 5.9124854 9.3976093 7.8852402  
O 4.5685466 8.2829047 5.6207311  
H 3.7200651 6.2561609 7.2337561  
C 4.6678973 6.7539944 7.4939736  
B 5.4630639 9.4116457 5.2051672  
C 6.7789171 8.283934 7.7926643  
H 6.7968894 8.0543042 8.6608346  
C 5.3769731 7.2186008 6.2228927  
H 5.2864112 6.0262093 8.0391889  
H 7.6866238 9.3473094 7.8139667  
C 6.7514059 7.9532027 6.4653150  
O 6.8133778 8.8947113 5.3755351  
H 4.4561510 5.7455637 4.9459915  
C 5.4705645 6.0582074 5.2314125  
H 6.0054188 6.3547639 4.3212713  
C 7.9659005 7.0340725 6.3800789  
H 5.9876334 5.1960961 5.6762404  
H 7.9094380 6.2342918 7.1338026  
H 8.8785119 7.6171042 6.5680050  
H 8.0506886 6.5765940 5.3865963  
H 5.1721713 10.4470162 5.7923037  
C 1.8023753 6.4381498 4.2982003  
H 0.7829707 6.6102207 3.9069207  
H 1.7152762 5.6150956 5.0321176  
H 2.3975353 6.0467192 3.4542755

**Int a'**

P 5.4250382 10.0247552 3.2357446  
P 1.3117192 9.0175230 7.3797141

Mg 2.8061559 8.1183250 5.3289260  
N 2.4919981 10.2399061 4.7954933  
C 3.8559315 10.8210445 2.7428199  
C 3.7954784 11.5356728 1.5343603  
H 4.6016836 11.4156801 0.8085993  
C 2.7610185 12.4389107 1.2183838  
C 1.7674849 12.6720714 2.1766314  
H 0.9891930 13.4162645 1.9822910  
C 1.7619696 11.9450811 3.3701270  
C 2.7624912 10.9393681 3.6404610  
C 1.3561057 10.8398214 5.3213008  
C 0.8666848 11.9031098 4.4947500  
C -0.3011328 12.5936108 4.8447888  
H -0.6784507 13.3979232 4.2056757  
C -0.9961357 12.2539032 6.0107012  
C -0.5116489 11.1914349 6.8081219  
H -1.0803708 10.9146719 7.7007826  
C 0.6467118 10.4754605 6.4883115  
C 2.7481206 13.1445554 -0.1163108  
H 3.7651631 13.4078530 -0.4446272  
H 2.1567625 14.702433 -0.0725756  
H 2.3075926 12.5109837 -0.9042623  
C -2.2339452 13.0094797 6.4304531  
H -2.6470598 13.5940954 5.5961294  
H -2.0180756 13.7140535 7.2507221  
H -3.0205773 12.3281301 6.7890434  
C 5.7366582 8.6032792 2.0670175  
H 5.6534358 9.0244315 1.0477016  
H 7.1392029 7.9950183 2.2434339  
H 7.9176122 8.7480348 2.0513434  
H 7.2710580 7.6857081 3.2921582  
C 7.3366207 6.7912641 1.3110783  
H 7.3293076 7.1410143 0.2629122  
H 8.3293920 6.3471681 1.4879926  
C 6.2373504 5.7387570 1.4983436  
H 6.3082728 5.3145441 2.5158879  
H 6.3861686 4.9024359 0.7970426  
C 4.8457316 6.3539612 1.3082382  
H 4.0631959 5.5995757 1.4866078  
H 4.7321169 6.6887867 0.2610542  
C 4.6326752 7.5475647 2.2465868  
H 3.6465405 8.0057606 2.0771942  
H 4.6409277 7.1849447 3.2889714  
C 6.8198195 11.2557520 2.9613142  
H 7.6438406 10.7518014 3.4995081  
C 6.5343162 12.5864226 3.6829363  
H 5.6892792 13.0904312 3.1829789  
H 6.2267273 12.4001118 4.7212282  
C 7.7735424 13.4927956 3.6533847  
H 7.5396221 14.5442424 4.1381226  
H 8.5737246 13.0230490 4.2528431  
C 8.2799785 13.7241672 2.2248560  
H 7.5254010 14.3030463 1.6621009  
H 9.1991997 14.3313148 2.2365936  
C 8.5286039 12.3950511 1.5019132  
H 9.3544140 11.8544655 1.9980295  
H 8.8461195 12.5743947 0.4620856  
C 7.2697556 11.5136600 1.5140043  
H 6.4740312 12.0404357 0.9642580  
H 7.4625607 10.5723623 0.9777464  
C -0.1939443 8.0334965 7.8950817  
H -0.8533183 8.6689295 8.5123620  
C -0.9583777 7.6024904 6.6295663  
H -0.2590935 7.0714408 5.9598515  
H -1.3076455 8.4920987 6.0827800  
C -2.1388078 6.6823213 6.9645959  
H -2.8912766 7.2486719 7.5422801  
H -2.6338008 6.3602900 6.0335754  
C -1.6862416 5.4651818 7.7801350  
H -2.5502425 4.8319410 8.0381781  
H -1.0108776 4.8465294 7.1625753  
C -0.9449785 5.8994406 9.0506682  
H -0.5940499 5.0185451 9.6118603  
H -1.6447418 6.4398558 9.7135250  
C 0.2456806 6.8109633 8.7205360  
H 0.9925383 6.2413315 8.1400922  
H 0.7422655 7.1335730 9.6500412  
C 2.0773858 9.7129219 8.9497718  
H 2.5884632 8.8441026 9.4045005  
C 1.1060544 10.3062757 9.9771110

H 0.5560618 11.1419725 9.5108197  
H 0.3571823 9.5601010 10.2858437  
C 1.8666691 10.8231661 11.2098202  
H 2.3353929 9.9666486 11.7273063  
H 1.1581357 11.2732309 11.9241402  
C 2.9533990 11.8350348 10.8234327  
H 2.4733595 12.7386706 10.4069576  
H 3.5096627 12.1569906 11.7185594  
C 3.9111589 11.2523145 9.7770211  
H 4.6528463 12.0072150 9.4707729  
H 4.4788566 10.4161362 10.2243819  
C 3.1463225 10.7455945 8.5486916  
H 3.8305007 10.3192430 7.7981800  
H 2.6470561 11.5956021 8.0526790  
H 4.8161779 8.2609004 8.4617552  
H 6.0129428 10.1912272 7.8843244  
O 4.8312103 8.5315344 5.8138727  
H 4.2689616 6.7161994 7.7695104  
C 5.1432717 7.3615474 7.9269724  
B 5.5730367 9.7047017 5.2556196  
C 6.9539993 9.6269180 7.8919754  
H 7.0440463 9.1054223 8.8555845  
C 5.7791485 7.7114941 6.5839304  
H 5.8623375 6.8193236 8.5594589  
H 7.7797590 10.3478508 7.8088334  
C 7.0377625 8.6583689 6.7012337  
O 6.9855462 9.4188302 5.4819315  
H 5.1251004 5.9287010 5.5719886  
C 6.0719744 6.4335980 5.7980203  
H 6.5796263 6.6583296 4.8517409  
C 8.3690487 7.9126047 6.7497302  
H 6.7052104 5.7473102 6.3780157  
H 8.4133118 7.2381119 7.6178748  
H 9.1888665 8.6394556 6.8403336  
H 8.5322599 7.3249974 5.8375989  
H 5.1401441 10.7651495 5.6913908  
C 2.6173618 5.9504516 5.5565509  
H 1.5531489 5.6538831 5.4816822  
H 2.9446967 6.6144767 6.5581215  
H 3.1651424 5.3157303 4.8341998  
H 1.8395013 5.8684139 3.2012384  
C 1.2185364 6.6190970 2.7036116  
H 1.5550649 6.7465276 1.6568350  
C -0.2841067 6.3599582 2.7725472  
O 1.3966488 7.8666172 3.4117928  
C 0.3204936 8.7183587 2.9374630  
C -0.8869700 7.7857901 2.6989370  
H 0.1461030 9.4839194 3.6990666  
H 0.6452847 9.2124687 2.0055522  
H -0.5310166 5.8813271 3.7314909  
H -1.3428027 7.9849057 1.7191965  
H -1.6621728 7.9310042 3.4632365  
H -0.6322807 5.7037508 1.9634849

**TS\_a**

B 1.7266171 2.6764039 0.2691737  
H 1.7631104 1.8119355 -0.5767010  
Mg 0.0860464 0.4526955 -0.0178287  
C 0.2137103 1.7141073 1.7957473  
O 1.1305387 3.9038676 -0.0704275  
O 2.8444188 2.8567987 1.1072881  
C 1.7471216 4.9353498 0.7594759  
C 1.8425015 6.2114876 -0.0711101  
H 2.3471607 6.0322476 -1.0287569  
H 2.3909394 6.9925698 0.4762543  
H 0.8316631 6.5893247 -0.2817459  
C 0.8551900 5.1801573 1.9805938  
H 0.7964379 4.2930869 2.6227586  
H -0.1609076 5.4157369 1.6333071  
H 1.2221992 6.0281243 2.5772773  
H 2.9799718 4.3583594 3.2960419  
H 4.6320988 4.1449543 2.6722895  
C 3.6742354 4.6569829 2.5011954  
C 3.8482324 5.7411781 2.5718964  
C 3.1369000 4.2837219 1.1248971  
H 3.8363587 4.2625954 -0.9438530  
C 4.2093695 4.5302389 0.0551003  
H 5.0781222 3.8936732 0.2747219  
H 4.5407692 5.5784644 0.0398681  
H -0.5070335 2.5451059 1.8015468

H -0.2986648 0.8722298 2.3087541  
H 1.0599101 1.9604886 2.4493617  
C 0.3016230 -2.5947184 -0.6761069  
C -0.4183716 -3.7251749 -1.1874277  
H -0.2369042 -5.7308062 -2.0034986  
C 1.6934487 -4.8741649 -1.5505226  
C 0.2938808 -4.8574760 -1.6121782  
H 1.8151910 -6.8515362 -2.4265489  
C 2.4771694 -6.0852706 -1.9990547  
H 3.2259407 -5.8236730 -2.7635176  
H 3.0221871 -6.5477308 -1.1599521  
C 2.3819025 -3.7397827 -1.0527832  
H 3.4751138 -3.7683249 -1.0279387  
C 1.7115662 -2.5977226 -0.6049736  
C -1.8080980 -3.3335625 -1.1479296  
C -3.0278130 -3.9231490 -1.5161110  
H -3.0516145 -4.9388504 -1.9220575  
C -4.2257158 -3.2103317 -1.3755698  
C -5.5484936 -3.8278349 -1.7652986  
H -6.2233888 -3.9193231 -0.8986826  
H -6.0738673 -3.2194260 -2.5188997  
H -5.4097661 -4.8340705 -2.1853174  
C -4.1944815 -1.8920162 -0.8555998  
H -5.1399743 -1.3490080 -0.7636887  
C -3.0032536 -1.2719174 -0.4678546  
C -1.8040118 -2.0008502 -0.6169180  
N -0.5332814 -1.5566755 -0.3241748  
O -0.1062051 0.9580964 -2.0913726  
C -0.3596787 0.6214843 -4.4466026  
H 0.0597510 -0.0147342 -5.2370161  
H -1.3832708 0.9007080 -4.7391829  
H -0.9268997 2.7652396 -2.7595073  
C 0.4761767 1.8817829 -4.1777115  
H 0.2787222 2.6906938 -4.8935498  
H 0.7668390 2.8371080 -2.1931883  
C 0.0458866 2.2435242 -2.7655255  
H 1.5525224 1.6504262 -4.1998453  
C -0.3637061 -0.0892484 -3.0929912  
H 0.4408515 -0.8323529 -2.9992528  
P -2.7661682 0.4099199 0.2427270  
H -1.3202399 -0.5697459 -2.8499526  
C -4.0731109 1.4777269 -0.5745104  
H -5.0690251 1.0420224 -0.3789695  
C -3.8472932 1.5166357 -2.0950091  
C -4.0195651 2.8943076 0.0247300  
H -4.2266966 2.8638574 1.1063994  
H -2.9922012 3.2887351 -0.0853480  
H -2.8159758 1.8577061 -2.2906944  
C -5.0065319 3.8407171 -0.6727403  
H -6.0384072 3.5016836 -0.4702719  
H -4.9181333 4.8528420 -0.2459645  
H -3.9269708 0.5020054 -2.5150608  
C -4.8348228 2.4649279 -2.7875914  
H -5.8593021 2.0655971 -2.6772753  
H -4.6256969 2.4967849 -3.8691997  
C -4.7740825 3.8748198 -2.1877745  
H -3.7792457 4.3125628 -2.3903740  
H -5.5124325 4.5317457 -2.6746733  
H -5.4254174 0.8341832 1.7972012  
H -5.1696589 -0.9172518 1.7046529  
C -4.8555872 -0.0006661 2.2343004  
C -5.2009972 -0.1317887 3.7270488  
H -4.9742114 0.8242544 4.2327417  
H -6.2836076 -0.3017712 3.8460071  
H -4.6365726 -1.3024543 5.4735221  
H -4.7151128 -2.2263849 3.9655702  
C -4.4046401 -1.2578514 4.3972961  
C -2.8975110 -1.0743052 4.1802382  
H -2.3398280 -1.9178875 4.6185639  
H -2.5579721 -0.1631491 4.7050895  
H -2.8223344 -1.8940313 2.1751132  
C -2.5636378 -0.9520647 2.6881255  
H -1.4799480 -0.8173410 2.5475086  
C -3.3473747 0.1997659 2.0316763  
H -3.0412547 1.1433539 2.5208688  
H 1.0496539 -0.9713846 2.6184860  
C 1.7702749 -1.8026473 2.6604114  
H 1.2582511 -2.6860716 2.2401973  
C 2.1684674 -2.0833559 4.1152349  
H 2.5712038 -1.1577538 4.5644327

H 1.2741641 -2.3544663 4.7001173  
H 2.7836614 -4.1414007 3.8548670  
H 3.5256569 -3.3499476 5.2537845  
C 3.2248718 -3.1910761 4.2056835  
H 5.1827887 -3.6801581 3.3847087  
C 4.4486182 -2.8589239 3.3441927  
H 4.9515265 -1.9646319 3.7549296  
H 3.6311961 -3.5095908 1.4464389  
C 4.0500912 -2.5878338 1.8851869  
H 4.9428691 -2.3300030 1.2928768  
H 3.4350959 -0.5289656 2.1676970  
C 2.9991780 -1.4743763 1.7950666  
P 2.4234343 -1.0368660 0.0575538  
C 3.9818468 -0.7433393 -0.9436317  
H 4.5537146 -1.6867854 -1.0019310  
H 5.2168315 -0.0165032 0.6982203  
C 4.8560056 0.3355493 -0.2808480  
H 4.2466859 1.2324409 -0.0789589  
C 6.0528350 0.7153910 -1.1639093  
H 6.7343630 -0.1500659 -1.2538505  
H 6.6282111 1.5202332 -0.6776681  
C 5.6067427 1.1489298 -2.5651329  
H 6.4813291 1.3982674 -3.1875282  
H 4.4215836 0.3832293 -4.2272027  
H 5.0018207 2.0702907 -2.4829690  
C 4.7674284 0.0541499 -3.2335706  
H 5.3978063 -0.8381723 -3.3992733  
C 3.5620285 -0.3271470 -2.3658953  
H 2.9880398 -1.1399421 -2.8394599  
H 2.8827268 0.5408835 -2.2883809

**Int\_b**

P 4.6722345 9.5406167 3.0005520  
P 1.1831435 9.3168414 7.1692084  
Mg 3.1458539 8.7225658 5.2307075  
N 2.2419486 10.5087763 4.5718902  
C 3.5448387 10.9035499 2.4832783  
C 3.5936220 11.6584714 1.3066094  
H 4.3863073 11.4700230 0.5771900  
C 2.6407099 12.6646672 1.0119321  
C 1.6026273 12.9153363 1.9191636  
H 0.8607204 13.6857263 1.6887063  
C 1.5101447 12.1730241 3.1064862  
C 2.4911371 11.1638894 3.3858716  
C 1.0870976 11.0763471 0.5771350  
C 0.5858837 12.1151456 4.2146552  
C -0.5991463 12.7795469 4.5634215  
H -0.9974623 13.5728247 3.9234530  
C -1.2883360 12.4245647 5.7296891  
C -0.7771379 11.3893987 6.5500468  
H -1.3403038 11.1175425 7.4477667  
C 0.4052664 10.7071375 6.2460731  
C 2.7646488 13.4587323 -0.2675768  
H 3.6414790 14.1267205 -0.2458611  
H 1.8766368 14.0842304 -0.4358498  
H 2.8842178 12.8006369 -1.1426864  
C -2.5562439 13.1403698 6.1317194  
H -2.9348743 13.7696877 5.3138294  
H -2.3923233 13.7951259 7.0036221  
H -3.3515078 12.4303848 6.4071239  
C 5.1564497 8.7075876 1.3898808  
H 5.4966967 9.4817419 0.6797417  
C 6.3027746 7.7063611 1.6134261  
H 7.1992526 8.2235313 1.9899064  
H 6.0039824 6.9844877 2.3947977  
C 6.6435473 6.9493022 0.3211591  
H 7.0443588 7.6643692 -0.4197747  
H 7.4433382 6.2177984 0.5179824  
C 5.4114814 6.2514705 -0.2678438  
H 5.0735159 5.4639546 0.4300543  
H 5.6722102 5.7460402 -1.2115407  
C 4.2673436 7.2477560 -0.4926873  
H 3.3720742 6.7288569 -0.8726092  
H 4.5635131 7.9741434 -1.2699886  
C 3.9229478 8.0035194 0.7971935  
H 3.1233837 8.7374447 0.6111857  
H 3.5336111 7.2893546 1.5457792  
C 6.2249419 10.4322422 3.5936510  
H 6.9182198 9.6123443 3.8577787  
C 5.8846963 11.1941030 4.8880468

H 5.1013158 11.9411303 4.6732526  
H 5.4642294 10.4963354 5.6317667  
C 7.1178610 11.8979187 5.4697233  
H 6.8299069 12.4688509 6.3677320  
H 7.8471830 11.1365751 5.7993568  
C 7.7788160 12.8176156 4.4366348  
H 7.0826680 13.6371926 4.1825609  
H 8.6800793 13.2872903 4.8624571  
C 8.1317086 12.0467056 3.1588706  
H 8.9006179 11.2885737 3.3921673  
H 8.5731170 12.7242034 2.4097517  
C 6.8969340 11.3499623 2.5659216  
H 6.1704074 12.1150865 2.2429873  
H 7.1830015 10.7814772 1.6659481  
C -0.2646108 8.3576230 7.8808443  
H -0.9232187 9.0575035 8.4253231  
C -1.0660004 7.7222055 6.7307909  
H -0.3822449 7.0293779 6.1323110  
H -1.4452840 8.5069071 6.0578528  
C -2.2200599 6.8571487 7.2539704  
H -2.9526591 7.5038301 7.7690265  
H -2.7515207 6.3914213 6.4081494  
C -1.7171680 5.7849805 8.2282031  
H -2.5609716 5.1959749 8.6214161  
H -1.0650118 5.0780566 7.6833283  
C -0.9234138 6.4144313 9.3797364  
H -0.5311970 5.6326090 10.0499260  
H -1.6006616 7.0410296 9.9870389  
C 0.2331802 7.2818604 8.8618852  
H 0.9713882 6.6399368 8.3472937  
H 0.7597433 7.7466483 9.7101588  
C 2.0061562 10.1449182 8.6496426  
H 2.4354717 9.3001856 9.2195221  
C 1.0759733 10.9496198 9.5658067  
H 0.5858472 11.7393170 8.9710412  
H 0.2746827 10.3077637 9.9659936  
C 1.8525051 11.5983187 10.7222048  
H 2.2622787 10.8059605 11.3749871  
H 1.1657701 12.1950061 11.3443367  
C 3.0026585 12.4704833 10.2043980  
H 2.5843918 13.3177487 9.6316451  
H 3.5636332 12.9044588 11.0476513  
C 3.9397172 11.6637686 9.2975433  
H 4.7393144 12.3082649 8.8969139  
H 4.4365383 10.8777423 9.8939563  
C 3.1755778 11.0080508 8.1399833  
H 3.8620454 10.3880803 7.5395335  
H 2.7827716 11.7904514 7.4669723  
H 2.0391990 5.6752542 5.3078066  
C 1.9628431 5.9415741 4.2444337  
H 2.8625449 5.5808761 3.7192488  
C 0.6772687 5.4743187 3.5696790  
O 1.9334076 7.3971237 4.1512499  
C 0.8823217 7.8271172 3.2260525  
C 0.4541020 6.5570745 2.5019892  
H 0.0669928 8.2668845 3.8194312  
H 1.3080598 6.6008195 2.5743275  
H -0.1556064 5.4669530 4.2898167  
H 1.0984169 6.3755021 1.6282112  
H -0.5868615 6.6122402 2.1577254  
H 0.7758970 4.4655225 3.1482069  
H 4.3800438 7.9412494 6.2285373

**Int\_c**

C 4.5141330 9.4964100 2.8880900  
C 3.6621125 9.5327235 4.1663666  
C 3.9014623 8.1493212 4.7625323  
O 5.2509277 7.7766964 4.3405135  
C 5.7465907 8.7254837 3.3393344  
Mg 6.4463031 6.2129292 5.0698834  
N 8.2056572 6.7158096 4.0469931  
C 8.5161840 6.4419448 2.7340707  
C 9.6408925 7.2040873 2.2737195  
C 10.0357723 8.0132004 3.4034592  
C 9.1159517 7.6693977 4.4482172  
C 7.8269121 5.5607867 1.8734073  
C 8.2836916 5.4557987 0.5554023  
C 9.3990550 6.1876918 0.0791973  
C 10.0706715 7.0594608 0.9461118  
C 11.0147492 8.9899719 3.6434185

C 11.0823172 9.6270851 4.8891964  
C 10.1562399 9.2748781 5.9027053  
C 9.1734472 8.2987451 5.7104243  
P 6.3696478 4.7310077 2.6388265  
C 6.9618756 2.9735348 2.9813325  
C 8.0123282 3.0205759 4.1059734  
C 8.4906145 1.6145920 4.4905408  
C 9.0096376 0.8437582 3.2706563  
C 7.9509318 0.7871517 2.1624232  
C 7.4776818 2.1941964 1.7652939  
C 9.8537409 6.0108176 -1.3505502  
C 12.1354046 10.6736756 5.1708851  
P 7.8719878 7.7452753 6.8917547  
C 8.7813048 6.6350485 8.1117950  
C 9.9430576 7.2899167 8.8685142  
C 10.6203615 6.2942078 9.8226936  
C 11.0881684 5.0368367 9.0795266  
C 9.9264194 4.3764658 8.3278113  
C 9.2385902 5.3625779 7.3743061  
C 5.1358512 4.5701522 1.2328146  
C 3.9620218 3.6627237 1.6348600  
C 2.8979394 3.5984174 0.5295654  
C 2.4020495 4.9965044 0.1420091  
C 3.5695286 5.9047392 -0.2606394  
C 4.6327715 5.9710537 0.8432143  
C 7.4084545 9.2857860 7.8547715  
C 6.7085254 10.2731360 6.9048038  
C 6.2235159 11.5264683 7.6444407  
C 5.3130708 11.1597030 8.8222832  
C 6.0123163 10.1838965 9.7258043  
C 6.4986629 8.9254708 9.0416929  
O 3.7872999 6.5476333 7.8933564  
C 3.4670926 5.6181526 7.2207116  
N 2.8876103 4.7392846 6.6206929  
C 3.2191260 3.6467527 5.7439974  
H 7.7649252 4.7938758 -0.1441312  
H 10.9258223 7.6328333 0.5755660  
H 11.7250979 9.2665621 2.8585192  
H 10.2180849 9.7957097 8.6624836  
H 10.2613793 5.0011738 -1.5235970  
H 10.6398181 6.7336355 -1.6101261  
H 9.0226963 6.1480306 -2.0605163  
H 12.6886229 10.9372108 4.2583696  
H 12.8693832 10.3196737 5.9133618  
H 11.6908633 11.5972556 5.5737923  
H 5.6474679 4.1222389 0.3623941  
H 4.3188521 2.6477269 1.8696884  
H 5.5045205 4.0576213 2.5601966  
H 3.3316080 3.1064162 -0.3594869  
H 2.0562578 2.9680950 0.8590693  
H 1.8751649 5.4451506 1.0040141  
H 1.6669623 4.9286898 -0.6758550  
H 3.2069480 6.9195495 -0.4915782  
H 4.0315783 5.5175342 -1.1862727  
H 5.4784311 6.6012710 0.5259962  
H 4.1981868 6.4492512 1.7401017  
H 6.0647084 2.4645315 3.3819626  
H 8.8733890 3.6262497 3.7725231  
H 7.5880681 3.5290825 4.9880422  
H 9.2724293 1.6875771 5.2642016  
H 7.6503192 1.0574919 4.9425621  
H 9.9132090 1.3467989 2.8818974  
H 9.3145203 -0.1745018 3.5611251  
H 7.0851113 0.1983213 2.5164148  
H 8.3473656 0.2637461 1.2772014  
H 8.3209164 2.7491121 1.3194242  
H 6.6977999 2.1218983 0.9895702  
H 8.3311010 9.7561347 8.2384590  
H 5.8417768 9.7625690 6.4491929  
H 7.3858121 10.5481130 6.0807268  
H 7.0976240 12.0892613 8.0186461  
H 5.6977551 12.1943162 6.9424412  
H 4.9999622 12.0671190 9.3633779  
H 4.3919023 10.6882457 8.4346708  
H 5.3348174 9.8955610 10.5953569  
H 8.6769104 10.6900071 10.2417696  
H 5.6292812 8.3537167 8.6712493  
H 7.0296603 8.2667638 9.7468150  
H 7.9966564 6.3422662 8.8336641  
H 10.6852677 7.6529233 8.1368932

H 9.5929441 8.1703053 9.4313090  
H 9.9048996 6.0042578 10.6132846  
H 11.4696979 6.7819378 10.3281277  
H 11.8757654 5.3160941 8.3568621  
H 11.5445327 4.3230561 9.7843322  
H 10.2808084 3.4987266 7.7628715  
H 9.1860473 4.0035927 9.0582623  
H 8.3723063 4.8793116 6.8931548  
H 9.9359186 5.6429393 6.5658713  
H 3.8716582 8.1224456 5.8601828  
H 3.2008477 7.3978549 4.3628545  
H 6.4937494 9.3737716 3.8227932  
H 6.2371489 8.1461283 2.5469671  
H 4.0278229 10.3146003 4.8493019  
H 3.9896863 8.9504785 2.0890392  
H 4.7703603 10.4961266 2.5136538  
H 2.5976043 9.7171718 3.9713262  
H 5.6844126 5.0209203 6.1348621  
H 4.2684456 3.7406095 5.4162252  
H 3.0794165 2.6896039 6.2679234  
H 2.5480585 3.6599788 4.8734524

**TS\_b**

P 2.6516654 -0.0550048 0.6003591  
P -2.6795116 0.1521976 -0.0551743  
Mg 0.0480262 0.8254799 0.0086052  
O 0.3000104 0.9086630 -2.1326579  
N -0.0201227 -1.2941684 -0.0827014  
C -1.7255937 -4.2567719 -1.3223553  
H -1.4648521 -5.2754180 -1.6256704  
C 0.7011912 -3.4272178 -0.7018077  
C -3.0587275 -3.8334570 -1.4088984  
C -1.1038067 -2.0449746 -0.4749881  
C 4.2029858 0.5511869 -0.2595295  
H 5.0339656 -0.1411028 -0.0372932  
C 2.3042344 -1.1322618 4.6492244  
H 1.5173798 -1.7278496 5.1397932  
H 2.2513471 -0.1184164 5.0859356  
C 3.1287995 -0.2561896 2.4163474  
H 3.1190474 0.7787259 2.8072441  
C 1.7058109 -4.3809433 -0.9275487  
H 1.4483623 -5.3814810 -1.2884478  
C 2.0253913 -1.0476191 3.1426341  
H 1.0441738 -0.5868549 2.9596336  
H 1.9838595 -2.0660233 2.7195549  
C -0.7331438 -3.3759159 -0.8648807  
C 2.4169956 -1.7824791 0.0073708  
C 1.0682218 -1.2347462 -0.2281749  
C 3.3861215 -2.7583100 -0.2425811  
H 4.4429404 -2.5213655 -0.0886423  
C -4.1418604 -4.7729338 -1.2855337  
H -4.8077983 -5.0751039 -1.0600779  
H -3.7134220 -5.6891672 -2.3157569  
H -4.7759396 -4.3037461 -2.6540604  
C 4.5639017 1.9557333 0.2567176  
H 3.6860104 2.6158213 0.1331523  
H 4.7829207 1.9251368 1.3361552  
C -2.4410140 -1.6025246 -0.5613834  
C 3.0499726 -4.0563317 -0.7024934  
C -3.9123217 0.8450271 -1.2855734  
H -4.8258712 0.2256974 -1.2658254  
C 4.5062546 -0.8749799 2.6864367  
H 4.5336051 -1.8898839 2.2530561  
H 5.3029071 -0.2944797 2.1951410  
C -3.6121114 0.0389655 1.5828629  
H -3.6170622 1.0807880 1.9543692  
C 4.7867047 -0.9616983 4.1955079  
H 5.7686413 -1.4325337 4.3662125  
H 4.8509469 0.0612972 4.6089237  
C 3.6854453 -1.7350120 4.9306577  
H 3.8870345 -1.7508545 6.0139650  
H 3.6953974 -2.7866582 4.5913888  
C -3.3952299 -2.5085965 -1.0340382  
H -4.4376505 -2.1924018 -1.1326548  
C 4.1445043 -5.0711854 -0.9379376  
H 4.9065192 -4.6914282 -1.0373597  
H 3.7394024 -6.0026140 -1.3577559  
H 4.6671151 -5.3280473 -0.0018513  
C 0.3467190 -0.2221478 -3.0611494  
H -0.5001696 -0.8803151 -2.8328809



|              |            |            |            |   |            |            |             |             |            |            |            |
|--------------|------------|------------|------------|---|------------|------------|-------------|-------------|------------|------------|------------|
| H            | 1.2832125  | -0.7722720 | -2.8819291 | C | 0.7804542  | 5.2563405  | -4.7125358  | H           | 4.6511086  | -0.2602834 | -2.6128686 |
| C            | 3.9683606  | 0.5689485  | -1.7792481 | C | -0.5654564 | 7.1669091  | -2.1502934  | H           | -2.6167949 | 3.0599496  | 5.6310153  |
| H            | 3.7522909  | -0.4495062 | -2.1380992 | C | -1.1763967 | 7.5897033  | -0.9614851  | H           | -2.6417231 | 4.7713811  | 5.1828920  |
| H            | 3.0691650  | 1.1742968  | -1.9871961 | C | -1.6943133 | 6.6273137  | -0.0587356  | H           | 0.5560247  | 0.6990273  | 2.0891145  |
| C            | -5.0594531 | -0.4655263 | 1.5036956  | C | -1.6228281 | 5.2544112  | -0.3145598  | H           | 0.8096859  | -0.3425309 | 0.6532950  |
| H            | -5.0598826 | -1.4874848 | 1.0859988  | C | -1.3021916 | 9.0596456  | -0.6354859  | H           | 4.3440655  | -2.7106963 | -3.1328775 |
| H            | -5.6588636 | 0.1597144  | 0.8232457  | P | -0.1320597 | 0.9036668  | -3.2248932  | H           | 3.3001086  | -2.1865683 | -1.8038867 |
| C            | -2.7928633 | -0.8128000 | 2.5700790  | C | -1.5727264 | 0.2830342  | -4.2654165  | H           | -0.2120792 | 2.8960921  | 5.0139165  |
| H            | -2.7292660 | -1.8430367 | 2.1796040  | C | -2.8067014 | 1.1574244  | -3.9789940  | H           | -0.4394756 | 4.1998538  | 6.1883623  |
| H            | -1.7635112 | -0.4326191 | 2.6360200  | C | -4.0422628 | 0.6308702  | -4.7204185  | H           | -0.3982762 | 5.8965669  | 4.3659298  |
| C            | -3.4451726 | -0.8337561 | 3.9592940  | C | -3.7834193 | 0.5121907  | -6.2271750  | H           | 1.0655651  | 4.9067119  | 4.2904805  |
| H            | -3.4218557 | 0.1852431  | 4.3869186  | C | -2.5507458 | -0.3558960 | -6.5107495  | H           | 3.8106079  | 2.5883329  | 0.9610607  |
| H            | -2.8561866 | -1.4726536 | 4.6369856  | C | -1.3096749 | 0.1703637  | -5.7715987  | H           | 2.5169926  | 2.7738584  | 2.1726018  |
| C            | -3.3130307 | 0.7925820  | -2.7013741 | P | -2.2190154 | 3.8561980  | 0.7290417   | H           | 3.1546018  | 0.2626587  | 0.5076073  |
| H            | -2.3463419 | 1.3252913  | -2.6934508 | C | -4.0890886 | 3.8552051  | -0.5247035  | H           | 2.9575847  | 0.3557055  | 2.2763539  |
| H            | -3.0961458 | -0.2505363 | -2.9793678 | C | -4.8005774 | 5.1647680  | 0.8854026   | H           | -1.6485068 | -1.4313126 | -1.0132308 |
| C            | 5.7600444  | 2.5471407  | -0.5029607 | C | -6.3173058 | 5.0527831  | 0.6634020   | H           | -5.0335495 | 0.1733441  | -1.7058309 |
| H            | 5.9687292  | 3.5648379  | -0.1354821 | C | -6.6428463 | 4.6246872  | -0.91729169 | H           | -4.7817208 | 0.1141839  | 0.0480113  |
| H            | 6.6597260  | 1.9427066  | -0.2887328 | C | -5.9356472 | 3.3120962  | -1.1306810  | H           | -5.7473664 | -1.1577311 | -0.7722925 |
| C            | -5.7138008 | -0.4881951 | 2.8950936  | C | -4.4208979 | 3.4094610  | -0.9109869  | <b>TS_c</b> |            |            |            |
| H            | -5.7962668 | 0.5478964  | 3.2704917  | C | 1.9488264  | 4.4494073  | -6.8116634  | Mg          | -0.2109247 | 0.9391765  | 0.0705426  |
| H            | -6.7417884 | -0.8781434 | 2.8176079  | C | 1.3242397  | -0.1849165 | -3.6809443  | O           | 1.9070303  | 1.3384924  | -0.1713699 |
| C            | -4.8969947 | -1.3219907 | 3.8896776  | C | 1.0192376  | -1.6601024 | -3.3705075  | C           | 2.4616074  | 2.4290285  | -0.4033097 |
| H            | -4.9060286 | -2.3787621 | 3.5674553  | C | 2.2354222  | -2.5541460 | -3.6518423  | N           | 2.0943884  | 3.6294782  | 0.0794856  |
| H            | -5.3634641 | -1.2916547 | 4.8877387  | C | 3.4771731  | -2.0760826 | -2.8896014  | B           | 1.1147691  | 3.8805255  | 1.2004734  |
| C            | -4.2744697 | 2.2893062  | -0.8969011 | C | 3.7852989  | -0.6065197 | -3.2007796  | C           | -1.0582924 | 2.9569724  | 0.2657357  |
| H            | -4.7480973 | 2.3137205  | 0.0978112  | C | 2.5726228  | 0.2889902  | -2.9168595  | C           | 2.7921722  | 4.8143540  | 4.4749498  |
| H            | -3.3436654 | 2.8795036  | -0.8166257 | C | -1.8873817 | 4.4009999  | 2.4912663   | H           | 3.5671235  | 4.4970530  | -1.1582236 |
| C            | 5.1653766  | 1.1623413  | -2.5331524 | C | -0.3677303 | 4.4996617  | 2.7115247   | H           | 2.0848278  | 5.4771130  | -0.9625913 |
| H            | 6.0402042  | 0.4998063  | -2.4069862 | C | -0.0283714 | 4.8763170  | 4.1595332   | H           | 3.2619189  | 5.3799000  | 0.3868932  |
| H            | 4.9482481  | 1.1928794  | -3.6137474 | C | -0.6626158 | 3.8961522  | 5.1533158   | O           | 0.7613304  | 5.2230217  | 1.3352491  |
| C            | -5.2031264 | 2.9363098  | -1.9343694 | C | -2.1779581 | 3.7982366  | 4.9410926   | H           | 3.3399794  | 2.4632568  | -1.0805161 |
| H            | -5.4145165 | 3.9787613  | -1.6465247 | C | -2.5252428 | 3.4234866  | 3.4925486   | O           | 1.1389912  | 3.2033470  | 4.2409658  |
| H            | -6.1721476 | 2.4055677  | -1.9343017 | H | -0.1661269 | 7.9137750  | -2.8428180  | C           | 1.1180492  | 4.2475551  | 3.4540352  |
| C            | 0.5064644  | 2.1587641  | -2.8573876 | H | 1.5115040  | -0.0813528 | -4.7643679  | C           | 0.3873441  | 3.7359000  | 4.6870522  |
| H            | -0.4573873 | 2.6920886  | -2.9113104 | H | -4.9018042 | 1.2931038  | -4.5270118  | H           | -0.6077617 | 1.3518942  | 4.4347170  |
| H            | 1.2064195  | 2.7706554  | -2.2738221 | H | -4.3071038 | -0.3600081 | -4.3112689  | H           | 0.9632063  | 2.9284562  | 5.1604860  |
| C            | 5.5124944  | 2.5638473  | -2.0161521 | H | -1.7774452 | -0.7225896 | -3.8542253  | H           | 0.2739553  | 4.5448780  | 5.4240109  |
| H            | 6.3931828  | 2.9623564  | -2.5447496 | H | 0.9768557  | 6.2846011  | -5.0307758  | H           | 3.0677816  | 3.6188151  | 4.1185119  |
| H            | 4.6737396  | 3.2491702  | -2.2373353 | H | -3.0050116 | 1.1826302  | -2.8960177  | C           | 2.5807181  | 4.5504232  | 3.8000623  |
| C            | -4.5983443 | 2.8806933  | -3.3246639 | H | -2.5980158 | 2.1955425  | -4.2907807  | H           | 3.1259601  | 4.9393023  | 2.9277542  |
| H            | -3.6822183 | 3.4979487  | -3.3665481 | H | 1.3183738  | 2.0469912  | -5.7498596  | H           | 2.6607046  | 5.2825639  | 4.6159504  |
| H            | -5.2942600 | 3.3187161  | -4.0761246 | H | -2.3558252 | 9.3834917  | -0.6276516  | H           | -1.4469253 | 5.6932942  | 3.8695727  |
| C            | -4.2436635 | 1.4411305  | -3.7339786 | H | -0.7710751 | 9.6774488  | -1.3730694  | C           | 0.9081133  | 6.8284029  | 3.1256474  |
| H            | -5.1707870 | 0.8455656  | -3.8118450 | H | -0.8874778 | 9.2917472  | 0.3583172   | H           | 1.9756635  | 6.9424514  | 2.8998761  |
| H            | -3.7703949 | 1.4178405  | -4.7294788 | H | 0.7337264  | -1.7534605 | -2.3065069  | H           | 0.3553637  | 7.5960238  | 2.5658581  |
| C            | 0.2980226  | 0.4007144  | -4.4521638 | H | 0.1546552  | -2.0093536 | -3.9565874  | H           | 0.7516377  | 7.0098227  | 4.1990120  |
| H            | 0.7885086  | -0.2321112 | -5.2034584 | H | -2.3323713 | 5.4019853  | 2.6600165   | C           | 0.3947637  | 5.4470063  | 2.7311856  |
| H            | -0.7449512 | 0.5632842  | -4.7652465 | H | -1.0465467 | 1.1676071  | -6.1643535  | C           | -1.1296745 | 5.4053210  | 2.8573902  |
| C            | 1.0088656  | 1.7454578  | -4.2362617 | H | -0.4490168 | -0.4889258 | -5.9695201  | H           | -1.5291676 | 4.4110208  | 2.6273315  |
| H            | 2.1006581  | 1.6046785  | -2.324621  | H | -4.4266381 | 3.0549561  | -1.2096358  | H           | -1.5644425 | 6.1177131  | 2.1427469  |
| H            | 0.7662237  | 2.4919397  | -5.0041098 | H | -2.3497601 | -0.3973799 | -7.5936446  | H           | -1.7592697 | 2.6582653  | -0.5411564 |
| H            | 0.1122577  | 2.6384033  | 0.1771229  | H | -2.7531892 | -1.3919096 | -6.1852467  | H           | -1.6536316 | 2.9988030  | 1.1926399  |
| C            | -0.1432585 | 2.5876020  | 2.2518970  | H | -4.6676412 | 0.0969452  | -6.7367388  | H           | -0.8104417 | 3.9963830  | 0.6083184  |
| O            | -0.2078480 | 1.3802354  | 2.3075084  | H | -3.6191976 | 1.5208181  | -6.6480100  | O           | -0.0082233 | 0.7920743  | -2.0731400 |
| N            | -0.1148873 | 3.7755788  | 2.4794751  | H | -2.1589665 | 6.9828229  | 0.8653445   | H           | 1.4982173  | -0.6474849 | -2.1900057 |
| C            | -0.2224103 | 4.5786210  | 3.6819574  | H | 2.9451229  | 3.9789772  | -6.8144409  | C           | 0.5640921  | -0.3840449 | -2.7156880 |
| H            | -1.0611248 | 5.2810241  | 3.5768084  | H | 2.0866597  | 5.5258729  | -6.9851246  | H           | -0.1622971 | -1.1993956 | -2.6049188 |
| H            | 0.6954299  | 5.1699561  | 3.8087184  | H | 1.3980785  | 4.0403483  | -7.6741254  | C           | 0.8238372  | 0.0416381  | -4.1558197 |
| H            | -0.3799956 | 3.9648181  | 4.5820972  | H | 1.3558512  | 3.6719262  | 0.2392457   | H           | 1.6256370  | -0.5447868 | -4.6237590 |
| <b>Int_d</b> |            |            |            | H | 2.2140162  | 2.5697186  | -0.8804228  | H           | -0.0894645 | -0.0734248 | -4.7580498 |
| C            | 2.6093560  | 0.7674684  | 1.3195338  | H | 2.7966869  | 1.3366270  | -3.1727242  | C           | 1.1804783  | 1.5283074  | -3.9949632 |
| C            | 1.1048150  | 0.5980557  | 1.1392055  | H | 2.3498339  | 0.2648725  | -1.8348979  | H           | 1.0383305  | 2.1102677  | -4.9155940 |
| O            | 0.7026438  | 1.6972305  | 0.2641060  | H | -4.4001739 | 5.9745089  | 0.2510700   | H           | 2.2298700  | 1.6356682  | -3.6786799 |
| C            | 1.7909801  | 2.6701463  | 0.1307801  | H | -4.5929248 | 5.4456461  | 1.9307347   | C           | 0.2379521  | 1.9754511  | -2.8801543 |
| C            | 2.7861303  | 2.2914969  | 1.2202303  | H | -3.9859770 | 4.1326408  | -1.6253246  | H           | -0.7351377 | 2.3259725  | -3.2585930 |
| Mg           | -1.0788579 | 1.8547718  | -0.7761473 | H | -3.9509828 | 2.4332386  | -1.1115986  | H           | 0.6513663  | 2.7590348  | -2.2293248 |
| O            | -2.3099186 | 0.4188978  | -0.3853781 | H | -6.3382706 | 2.4964481  | -0.5034123  | C           | 3.1134482  | 0.6466368  | 3.2887025  |
| C            | -2.5390975 | -0.7948557 | -0.8359908 | H | -6.1414411 | 3.0329499  | -2.1766336  | H           | 2.5933201  | 0.9891035  | 4.1980799  |
| N            | -3.6797894 | -1.3474242 | -1.0858672 | H | 0.0840003  | 3.5185396  | 2.4765291   | H           | 2.9810283  | 1.4493709  | 2.5464328  |
| C            | -4.8595051 | -0.5146120 | -0.8579613 | H | 0.0690620  | 5.2278647  | 2.0103177   | C           | 4.6062401  | 0.4486124  | 3.5832506  |
| N            | -0.8016758 | 3.5516310  | -1.9243881 | H | 1.9988678  | -3.5972262 | -3.3882494  | H           | 4.7258336  | -0.2665400 | 4.3171749  |
| C            | -0.9949091 | 4.8485349  | -1.5103331 | H | 2.4479664  | -2.5426121 | -4.7358703  | H           | 5.0475695  | 1.4014453  | 3.9196013  |
| C            | -0.4623153 | 5.7983280  | -2.4429939 | H | -6.7334921 | 4.3099298  | 1.3675467   | H           | 5.3102164  | 0.6699000  | 1.5484306  |
| C            | 0.1014598  | 5.0008834  | -3.5107480 | H | -6.8000880 | 6.0154757  | 0.8977788   | C           | 5.3534927  | -0.0851812 | 2.3552338  |
| C            | -0.1394374 | 3.6408512  | -3.1266090 | H | -6.3133788 | 5.4165931  | -1.4695548  | H           | 6.4194858  | -0.2378383 | 2.5890910  |
| C            | 0.2831887  | 2.5584144  | -3.9253033 | H | -7.7320442 | 4.5213489  | -0.9033435  | H           | 5.2432235  | -1.7554129 | 0.9587797  |
| C            | 0.9640321  | 2.8588390  | -5.1085286 | H | -3.6186464 | 3.3990497  | 3.3657919   | C           | 4.7186093  | -1.3888316 | 1.8561531  |
| C            | 1.2174564  | 4.1933610  | -5.5147510 | H | -2.1617843 | 2.4013498  | 3.2792647   | H           | 4.8373541  | -2.1687195 | 2.6304786  |
|              |            |            |            | H | 4.0674439  | -0.5091665 | -4.2641654  | H           | 2.7795730  | -2.1554413 | 1.2291270  |

C 3.2283441 -1.2005517 1.5426726  
H 3.1158097 -0.5008795 0.6983381  
C 2.4620659 -0.6403260 2.7561355  
H 2.4761197 -1.4020101 3.5579991  
N -1.3582106 -0.9356008 0.0070299  
C -0.8661019 -2.0811229 0.7387452  
C 0.0410154 -1.9849592 1.8242103  
C 0.3998672 -3.1989996 2.4197894  
H 1.1099281 -3.1950657 3.2522098  
C -0.1109091 -4.4436552 1.9857044  
H -0.0822293 -6.6019378 2.1593770  
C 0.3063903 -5.7167016 2.6826359  
H -0.0675962 -5.7532826 3.7192347  
H 1.4028427 -5.8107517 2.7334837  
H -1.4285620 -5.4142544 0.5748431  
C -1.0168390 -4.4608034 0.9203978  
C -1.4003220 -3.2626846 0.3017588  
C -2.3008072 -2.9367098 -0.7661744  
C -2.2619520 -1.5012469 -0.8922944  
H -3.1174441 -4.8181158 -1.4681510  
C -3.1179420 -3.7297214 -1.5825821  
H -4.8474637 -4.9955395 -3.1436628  
C -4.8276486 -3.9384507 -3.4451335  
H -5.8645632 -3.5666416 -3.4385112  
H -4.4786970 -3.8977269 -4.4902965  
C -3.9424493 -3.1259769 -2.5308184  
C -3.9494235 -1.7156631 -2.6074425  
H -4.6430405 -1.2597521 -3.3178193  
C -3.1525731 -0.8811836 -1.8118884  
P -3.3206669 0.9656498 -1.8492681  
C -4.0763696 1.2938227 -3.5510739  
H -4.9915943 0.6905081 -3.6830551  
C -3.0860939 0.9175363 -4.6661217  
H -2.8283809 -0.1506400 -4.6007126  
H -2.1464008 1.4769716 -4.5117381  
H -3.5816480 3.4022343 -3.4469566  
C -4.4696026 2.7781139 -3.6586198  
H -5.2194324 3.0336774 -2.8935003  
H -4.5280046 0.6314143 -6.2563073  
C -3.6376029 1.2550410 -6.0571250  
H -2.8939096 0.9696770 -6.8289465  
C -4.0237204 2.7354901 -6.1577828  
H -4.4487155 2.9579014 -7.1498803  
H -3.1122500 3.3529922 -6.0587564  
C -5.0142148 3.1221962 -5.0527716  
H -5.2515661 4.1972032 -5.1069939  
H -5.9642310 2.5808024 -5.2127022  
C -4.8169901 1.2088027 -0.6947875  
H -4.9884567 2.3018694 -0.7260488  
C -6.1171935 0.4952414 -1.0854448  
H -5.9284724 -0.5913146 -1.1279469  
H -6.4411891 0.8003224 -2.0935181  
C -7.2437320 0.7757158 -0.0780271  
H -8.1526417 0.2525044 -0.3697372  
H -7.5030213 1.8497504 -0.1115341  
H -5.7188824 2.2118766 1.7917067  
C -5.5306877 1.1235155 1.7460765  
H -5.2147532 0.8159696 2.7566346  
H -6.6635105 -0.6877513 1.4045702  
C -6.8254347 0.4040038 1.3493068  
H -7.6332784 0.6410098 2.0608936  
C -4.4035286 0.8457589 0.7423915  
H -4.1351467 -0.2237696 0.7810389  
H -3.4955757 1.4020052 1.0222976  
C -0.2130749 0.0948748 3.8923323  
H 0.1689478 1.1018968 4.1250833  
H -2.1016704 -0.7602591 3.2593448  
C -1.7209818 0.2152121 3.6074826  
H -1.8918099 0.9251230 2.7823812  
C -2.4991646 0.6521069 4.8557573  
H -3.5781070 0.6751719 4.6320073  
H -2.2119472 1.6850458 5.1226589  
H -2.7538522 0.0854556 6.9427068  
C -2.2183204 -0.2707076 6.0478807  
H -2.6088151 -1.2798801 5.8245295  
C -0.7139652 -0.3680691 6.3284176  
H -0.3373233 0.6232962 6.6398288  
H -0.5215367 -1.0562102 7.1675146  
C 0.0584246 -0.8314768 5.0831450  
H -0.2539548 -1.8575055 4.8227140

H 1.1367425 -0.8708764 5.3054036  
P 0.6690113 -0.3294631 2.2884845

**Pdt**

C 16.8821630 10.6402055 16.8816217  
N 17.8869309 9.6987669 16.8049738  
O 16.0880949 10.8750013 15.9757568  
C 17.9968636 8.9320942 15.5567553  
H 18.1687258 9.6093156 14.7088958  
H 17.0681574 8.3765288 15.3673166  
H 18.8331578 8.2314121 15.6441466  
H 21.6787942 6.8559265 18.9216081  
H 20.1736857 6.7198801 19.8616295  
H 21.0319798 7.3682036 19.6474670  
H 21.6059068 7.5114067 20.5746200  
H 22.2946729 8.9459817 17.7851077  
O 19.7333924 8.4667474 17.9105814  
C 20.5931068 8.7116387 19.0833264  
C 21.7991621 9.5109917 18.5863247  
H 22.5265173 9.6784734 19.3928372  
H 19.2825003 8.1618152 21.6765300  
B 18.7923798 9.4769752 17.9152665  
C 18.7232280 8.6710365 20.8795753  
C 19.6445682 9.5459159 20.0265879  
H 21.0700955 10.0946813 21.5621245  
H 21.4933490 10.4862046 18.1818437  
H 18.2122530 7.9130148 20.2692316  
C 20.3510460 10.5823569 20.8878168  
H 18.7852815 10.2519578 19.0591412  
H 17.9599633 9.3088414 21.3456854  
H 20.8856051 11.3188978 20.2761577  
H 19.6137581 11.1158495 21.5039076  
H 16.8598108 11.1713589 17.8547663

**Int b'**

P 4.8189181 9.3403257 2.8648959  
P 1.3254788 9.0874062 7.3358589  
Mg 3.2692411 8.4851445 5.2443659  
N 2.4746370 10.3516941 4.7032446  
C 3.7089418 10.7829695 2.5527656  
C 3.7211807 11.5946316 1.4113320  
H 4.4473890 11.3895492 0.6203800  
C 2.8163932 12.6651703 1.2196171  
C 1.8497837 12.9206726 2.1994296  
H 1.1345538 13.7357531 2.0537425  
C 1.7871834 12.1220535 3.3495054  
C 2.7230791 11.0476949 3.5364716  
C 1.3671873 10.9517427 5.2719536  
C 0.9016340 12.0593713 4.4850554  
C -0.2354727 12.7750688 4.8815513  
H -0.5934292 13.6182011 4.2824563  
C -0.9312035 12.4040280 6.0375235  
C -0.4693457 11.2992787 6.7894964  
H -1.0478768 11.0023646 7.6683109  
C 0.6733993 10.5664317 6.4454577  
C 2.9118389 13.5171484 -0.0240727  
H 3.7807413 14.1948987 0.0164447  
H 2.0145517 14.1393856 -0.1518135  
H 3.0269008 12.9004224 -0.9289781  
C -2.1501504 13.1696111 6.4945812  
H -2.5468277 13.8055644 5.6902715  
H -1.9183652 13.8266563 7.3493661  
H -2.9550058 12.4918452 6.8183047  
C 4.7865391 8.3681705 2.1509283  
H 5.1905350 9.0153908 0.4525524  
C 5.6866951 7.1272692 1.3936810  
H 6.7227726 7.4234039 1.6247678  
H 5.3338159 6.5307490 2.2548575  
C 5.6625483 6.2616297 1.0262301  
H 6.1167131 6.8270039 -0.7078819  
H 6.2854067 5.3647315 0.2743055  
C 4.2315278 5.8649782 -0.2545180  
H 3.8145894 5.2136573 0.5359207  
H 4.2303066 5.2729166 -1.1835647  
C 3.3405905 7.1032132 -0.4063326  
H 2.3046926 6.8064206 -0.6408496  
H 3.6941212 7.7057522 -1.2626386  
C 3.3605313 7.9661987 0.8614102  
H 2.7414477 8.8658791 0.7239435  
H 2.9183176 7.3995721 1.6959502

C 6.5850073 10.0411888 2.8572215  
H 7.1871467 9.1862200 3.2196560  
C 6.6910123 11.1629010 3.8957049  
H 6.0534752 12.0064677 3.5806423  
H 6.2830924 10.8118077 4.8521920  
C 8.1345009 11.6440376 4.0783866  
H 8.1640237 12.4650229 4.8128161  
H 8.7409272 10.8227859 4.5029508  
C 8.7430668 12.0855832 2.7426376  
H 8.2062527 12.9805761 2.3799101  
H 9.7959787 12.3812680 2.8761561  
C 8.6297405 10.9733984 1.6932463  
H 9.2507345 10.1140284 2.0056749  
H 9.0299168 11.3153663 0.7250676  
C 7.1765878 10.5011320 1.5615866  
H 6.5743624 11.3350384 1.1178149  
H 7.1442338 9.6939861 0.7685655  
C -0.1851972 7.9876409 7.5842954  
H -0.9079985 8.5313911 8.2165842  
C -0.8684278 7.6659376 6.2515101  
H -0.1217668 5.72159346 5.72159346  
H -1.2094137 8.5963333 5.7724672  
C -2.0430314 6.6967743 6.4333119  
H -2.8337329 7.1886421 7.0277550  
H -2.4896071 6.4629851 5.4524576  
C -1.6024744 5.4113271 7.1429398  
H -2.4620398 4.7385253 7.2931035  
H -0.8855019 4.8691696 6.4992447  
C -0.9301950 5.7281520 8.4837113  
H -0.5801767 4.8028285 8.9689344  
H -1.6741599 6.1799794 9.1648461  
C 0.2460050 6.6986874 8.3061118  
H 1.0406911 6.2103947 7.7133104  
H 0.6896043 6.9331498 9.2874250  
C 1.6806594 9.6633324 9.1152492  
H 2.2386956 8.8083353 9.5434484  
C 0.4669797 9.9421256 10.0151942  
H -0.1332560 10.7562334 9.5747743  
H -0.1874409 9.0601919 10.0828532  
C 0.9006724 10.3608506 11.4287604  
H 1.4241094 9.5158610 11.9124431  
H 0.0096117 10.5711950 12.0425425  
C 1.8308205 11.5775933 11.3936955  
H 1.2770459 12.4471093 10.9953807  
H 2.1521327 11.8467121 12.4126267  
C 3.0453489 11.3003370 10.5035678  
H 3.6982853 12.1863888 10.4458136  
H 3.6474640 10.4957423 10.9642201  
C 2.6240316 10.8730630 9.0917432  
H 3.5055370 10.6322933 8.4837841  
H 2.1167455 11.7141596 8.5886034  
H 4.7917587 8.0755563 9.0163313  
H 5.5426493 10.0026819 9.8960971  
O 5.0810347 9.6380310 6.8660123  
H 4.8149779 7.0532665 7.5537541  
C 5.4361531 7.6536334 8.2348075  
B 5.5165770 10.9562644 7.0177283  
C 6.6160558 9.8027338 9.7563572  
H 6.8550937 8.8682429 10.2824696  
C 6.1287963 8.7430926 7.4262829  
H 6.1833307 6.9996073 8.7084634  
H 7.1662770 10.6240954 10.2354766  
C 7.0174150 9.7340556 8.2813439  
O 6.7094807 11.0457398 7.7073205  
H 6.1274988 7.5971485 5.6143145  
C 6.8630897 8.1283869 6.6262072  
H 7.3576665 8.8959202 5.6261240  
C 8.5189515 9.5001306 8.1596357  
H 7.6212750 7.4083324 6.5737103  
H 8.7879008 8.5000558 8.5292635  
H 9.0543075 10.2446912 8.7652022  
H 8.8591791 9.5940164 7.1210900  
H 1.6776216 5.6889562 4.7572613  
C 1.5826169 6.1401952 3.7608583  
H 2.4212834 5.7813514 3.1406790  
C 0.2332992 5.9141415 3.0847743  
O 1.7083688 7.5846838 3.9179747  
C 0.6991826 8.2673146 3.1064951  
C 0.0629642 7.1854998 2.2371972  
H -0.0251994 8.7361705 3.7879646

H 1.2025230 9.0564978 2.5355791  
H -0.5689650 5.8386694 3.8338689  
H 0.6036558 7.0869868 1.2844215  
H -0.9877106 7.4102937 2.0102143  
H 0.2249112 4.9945965 2.4844706  
H 3.9300017 6.8848822 5.6160317  
C 4.7480147 12.2274007 6.5262756  
H 3.9660753 11.9878634 5.7966609  
H 5.4444224 12.9571804 6.0877241  
H 4.2704694 12.7264375 7.3848292

**Int\_c'**

P 4.9080915 9.3122626 2.9460253  
P 1.3625042 9.1279830 7.4134537  
Mg 3.3148691 8.5140240 5.3971799  
N 2.5153487 10.3343295 4.7514790  
C 3.7697249 10.7292977 2.6041000  
C 3.7787795 11.5123609 1.4422412  
H 4.5157737 11.3008731 0.6636445  
C 2.8577223 12.5608250 1.2120869  
C 1.8720325 11.5123609 2.1713020  
H 1.1422005 13.6166068 1.9956903  
C 1.8097974 12.0490253 3.3393726  
C 2.7662086 11.0004786 3.5683395  
C 1.3859315 10.9245370 5.2875334  
C 0.9077388 11.9975134 4.4625622  
C -0.2525507 12.6964176 4.8203584  
H -0.6200846 13.5136872 4.1920458  
C -0.9586090 12.3405436 5.9747053  
C -0.4825916 11.2694024 6.7656898  
H -1.0676697 10.9837153 7.6438506  
C 0.6836632 10.5563466 6.4617217  
C 2.9563113 13.3858364 -0.0494400  
H 3.8054973 14.0881763 -0.0070424  
H 2.0455843 13.9803430 -0.2098138  
H 3.1072464 12.7519197 -0.9369382  
C -2.2045587 13.0861316 6.3897133  
H -2.5868994 13.7115766 5.5705337  
H -2.0112211 13.7500696 7.2486168  
H -3.0071458 12.3953413 6.6907959  
C 4.8979461 8.3422436 1.3278285  
H 5.2022852 9.0295670 0.5192517  
C 5.9093738 7.1851464 1.4024209  
H 6.9274580 7.5675582 1.5770010  
H 5.6601435 6.5523311 2.2715135  
C 5.8874354 6.3274955 0.1297027  
H 6.2405975 6.9353302 -0.7229989  
H 6.5948139 5.4887436 0.2326982  
C 4.4775156 5.8077973 -0.1726194  
H 4.1636686 5.1204316 0.6346658  
H 4.4757153 5.2207388 -1.1047912  
C 3.4760917 6.9647349 -0.2638535  
H 2.4581184 6.5806241 -0.4432180  
H 3.7288337 7.5985125 -1.1326434  
C 3.4929113 7.8199828 1.0087404  
H 2.7947676 8.6656146 0.9111445  
H 3.1430971 7.2146702 1.8613991  
C 6.6602637 10.0457664 2.9303587  
H 7.2821438 9.1879918 3.2522323  
C 6.7728372 11.1322023 4.0040587  
H 6.1229550 11.9795777 3.7273806  
H 6.3849791 10.7449618 4.9549531  
C 8.2155825 11.6181265 4.1805161  
H 8.2513188 12.4130111 4.9429689  
H 8.8334277 10.7862022 4.5664567  
C 8.8004425 12.1103439 2.8516601  
H 8.2547430 13.0161186 2.5311555  
H 9.8543130 12.4052369 2.9788381  
C 8.6732955 11.0377253 1.7630252  
H 9.3047834 10.1706578 2.0299738  
H 9.0524791 11.4190259 0.8011504  
C 7.2191758 10.5649331 1.5970311  
H 6.6042186 11.4129886 1.2518175  
H 7.1714387 9.7929595 0.8140938  
C -0.1121285 7.9912426 7.6979902  
H -0.8561099 8.5400062 8.3006131  
C -0.7755032 7.5927825 6.3757265  
H -0.0098819 7.1434155 5.7256919  
H -1.1478385 8.4901050 5.8579677  
C -1.9143022 6.5880672 6.5917022

H -2.7253470 7.0725550 7.1645335  
H -2.3476455 6.3003725 5.6192361  
C -1.4280065 5.3487723 7.3520013  
H -2.2610988 4.6476935 7.5208784  
H -0.6829701 4.8132160 6.7356681  
C -0.7816251 5.7438175 6.6846676  
H -0.3975358 4.8526242 9.2059545  
H -1.5502241 6.1899962 9.3420562  
C 0.3590572 6.7506560 8.4780507  
H 1.1802602 6.2649833 7.9230097  
H 0.7768088 7.0444165 9.4548614  
C 1.6903805 9.7823995 9.1708037  
H 2.2626050 8.9580147 9.6379021  
C 0.4580232 10.0657311 10.0435011  
H -0.1588903 10.8424229 9.5608968  
H -0.1716760 9.1690229 10.1415533  
C 0.8602979 10.5575016 11.4425922  
H 1.4005948 9.7500412 11.9694875  
H -0.0454337 10.7681250 12.0342728  
C 1.7556564 11.7979634 11.3660298  
H 1.1839095 12.6323987 10.9208147  
H 2.0538159 12.1216457 12.3761270  
C 2.9908413 11.5153165 10.5068620  
H 3.6203019 12.4155735 10.4175693  
H 3.6074266 10.7501190 11.0129680  
C 2.6034854 11.0134414 9.1097226  
H 3.5017858 10.7682220 8.5285860  
H 2.0858424 11.8182140 8.5598522  
H 4.7173640 8.1629823 9.1341214  
H 5.4554289 10.1007543 9.9462655  
O 5.0647360 9.6507212 6.9315310  
H 4.7638608 7.0914207 7.7116203  
C 5.3756460 7.7124040 8.3810187  
B 5.4995194 10.9749260 7.0581211  
C 6.5308644 9.8983791 9.8620263  
H 6.7589655 8.9804027 10.4207892  
C 6.0942272 8.7697191 7.5536495  
H 6.1070580 7.0695811 8.8929658  
H 7.0708769 10.7341262 10.3275972  
C 6.9635153 9.7861912 8.3988122  
O 6.6705488 11.0801492 7.7800650  
H 6.1347845 7.5645395 5.7845098  
C 6.8577335 8.1123833 6.4054863  
H 7.3722767 8.8542913 5.7802069  
C 8.4673553 9.5490339 8.3171013  
H 7.6019432 7.4002630 6.7882074  
H 8.7275201 8.5599202 8.7208990  
H 8.9886845 10.3105612 8.9371500  
H 8.8315030 9.6145139 7.2844472  
H 1.7220918 5.6758381 4.9779016  
C 1.6695752 6.0849691 3.9602647  
H 2.5284279 5.6992135 3.3860525  
C 0.3447507 5.8265803 3.2477508  
O 1.7948413 7.5350619 4.0572928  
C 0.7871401 8.1801477 3.2146441  
C 0.1933072 7.0684944 2.3552787  
H 0.0375912 8.6451129 3.8717511  
H 1.2853421 8.9695610 2.6397827  
H -0.4804617 5.7629604 3.9730777  
H 0.7704456 6.9476190 1.4267889  
H -0.8504590 7.2750457 2.0838247  
H 0.3624144 4.8876193 2.6786103  
H 3.9856586 6.9111138 5.7555330  
C 4.7573719 12.2378996 6.5091788  
H 4.0153696 11.9912561 5.7418099  
H 5.4788618 12.9614493 6.1024167  
H 4.2328706 12.7468538 7.3337832  
N 4.6280059 4.2271184 5.5842869  
H 5.0457105 5.9030030 4.4207868  
C 5.3028188 4.8297236 4.4654243  
H 6.3909528 4.7102261 4.5747278  
H 4.9988977 4.3293718 3.5335417  
C 3.8806046 4.6060666 6.4646143  
O 3.1517183 4.6896596 7.4020903

**TS\_b'**

P 4.7176628 9.2495653 2.8122564  
P 1.2713002 8.9540070 7.2480689  
Mg 3.2742087 8.4448518 5.2288512  
N 2.2077691 10.0745867 4.4873535

C 3.4538044 10.5175062 2.3511476  
C 3.3979754 11.2404281 1.1530621  
H 4.1838248 11.0958437 0.4071485  
C 2.3494505 12.1401986 0.8470986  
C 1.3055573 12.3090416 1.7652973  
H 0.4829519 12.9901719 1.5269064  
C 1.3082343 11.5966911 2.9724327  
C 2.3909581 10.7002290 3.2742918  
C 1.0096598 10.5403068 4.9820431  
C 0.4004525 11.4870466 4.0885825  
C -0.8485756 12.0395860 4.4026863  
H -1.3206071 12.7588316 3.7262866  
C -1.5089046 11.6621484 5.5780419  
C -0.8953108 10.7249548 6.4427546  
H -1.4380755 10.4291094 7.3445061  
C 0.3598945 10.1601763 6.1851069  
C 2.3741632 12.9068413 -0.4544702  
H 3.1397215 12.7006043 -0.4424764  
H 1.4055552 13.3873068 -0.6528311  
H 2.6057396 12.2491321 -1.3066595  
C -2.8522567 12.2502086 5.9410710  
H -3.2812096 12.8133319 5.1000582  
H -2.7736877 12.9418674 6.7962734  
H -3.5732603 11.4680377 6.2253979  
C 4.7649522 8.0627457 1.3466474  
H 5.1563739 8.6086718 4.0706164  
C 5.7189341 6.9035867 1.6902092  
H 6.7351855 7.2835954 1.8842321  
H 5.3809560 6.4298945 2.6299115  
C 5.7653818 8.5853606 1.0711655  
H 6.2179199 6.3027750 -0.3314757  
H 6.4206640 5.0201711 0.8715630  
C 4.3637404 10.5380313 0.2263295  
H 3.9527775 4.7973653 1.0991609  
H 4.4140180 4.6104156 -0.5997235  
C 3.4273430 6.4967038 4.6207892  
H 2.4126751 6.1205378 -0.3458278  
H 3.7826543 6.9786460 -1.0619547  
C 3.3703217 7.5394529 0.9905249  
H 2.7150667 8.3772412 0.7067669  
H 2.9317271 7.0842990 1.8902922  
C 6.4340856 10.0594902 6.6783680  
H 7.0880098 9.2752461 3.1053321  
C 6.5312811 11.2884672 3.5900043  
H 5.8554232 12.0740624 3.2113848  
H 6.1778169 11.0336880 4.5975095  
C 7.9630339 11.8327098 3.6684133  
H 7.9859538 12.7249413 4.3138421  
H 8.6100338 11.0774098 4.1515400  
C 8.5147666 12.1535416 2.2750192  
H 7.9367441 12.9891961 1.8414916  
H 9.5606983 12.4933997 2.3425806  
C 8.4068009 10.9352351 1.3507959  
H 9.0675610 10.1332514 1.7271638  
H 8.7617034 11.1860798 0.3379877  
C 6.9666429 10.3999224 1.2773074  
H 6.3212638 11.1672210 0.8168825  
H 6.9421001 9.5196086 0.6187776  
C 0.0540393 7.5837733 7.6835335  
H -0.7390885 8.0008211 8.3264592  
C -0.6093823 6.9887615 6.4382994  
H 0.1810616 6.6731984 5.7429482  
H -1.1990217 7.7623040 5.9222886  
C -1.4925544 7.5841116 6.7875942  
H -2.3371124 6.1190691 7.4167256  
H -1.9345993 5.3652464 5.8684015  
C -0.6976718 4.7095970 7.5390464  
H -1.3479760 3.8588796 7.7986366  
H 0.0942881 4.3149406 6.8758413  
C -0.0489722 5.2939528 8.7991815  
H 0.5535418 4.5276324 9.3138766  
H -0.8418421 5.5990276 9.5058847  
C 0.8322695 6.5052408 8.4638788  
H 1.6926153 6.1755058 7.8531404  
H 1.2511854 6.9294635 9.3916828  
C 1.4885679 9.8142184 8.9372994  
H 2.2084620 9.1538364 9.4573125  
C 0.2349906 9.9367777 9.8183737  
H -0.5264149 10.5327453 9.2880982  
H -0.2068496 8.9482741 10.0122447

C 0.5500092 10.6179863 11.1591004  
H 1.2406743 9.9772493 11.7369752  
H -0.3730187 10.7035557 11.7552244  
C 1.1917550 11.9936131 10.9549539  
H 0.4687771 12.6619091 10.4533727  
H 1.4305699 12.4561631 11.9260747  
C 2.4518850 11.8721883 10.0942260  
H 2.8981789 12.8627579 9.9097072  
H 3.2060928 11.2862244 10.6497536  
C 2.1564434 11.1838502 8.7554283  
H 3.0842649 11.0643847 8.1806782  
H 1.4952611 11.8281717 8.1508084  
H 4.5096759 8.5596483 8.9121980  
H 5.0191274 10.5812193 9.5832071  
O 4.7218288 9.8184233 6.5459310  
H 4.7117247 7.3551086 7.6148592  
C 5.2317562 8.1143043 8.2166753  
B 4.9393819 11.2026041 6.5635667  
C 6.1112761 10.5335641 9.4878075  
H 6.4815159 9.7068566 10.1095092  
C 5.8388877 9.1557111 7.2851479  
H 6.0246261 7.6218340 8.7983508  
H 6.5262659 11.4744094 9.8742430  
C 6.5385689 10.3693515 8.0278190  
O 6.0399456 11.5469430 7.3174283  
H 6.1052704 7.7495023 5.6840708  
C 6.7176353 8.4750363 6.2383752  
H 7.1404394 9.1993188 5.5300458  
C 8.0612549 10.3718953 7.9319637  
H 7.5434699 9.7335431 6.7200968  
H 8.4841183 9.4796263 8.4154578  
H 8.4547892 11.2597749 8.4462131  
H 8.4009859 10.4004302 6.8895541  
H 2.0345316 5.3892641 5.0050904  
C 1.8697852 5.7393837 3.9774566  
H 2.7492731 5.4566604 3.3748666  
C 0.5657801 5.2661969 3.3398927  
O 1.7877026 7.1966215 4.0160843  
C 0.6744140 7.6569100 3.1862496  
C 0.1985118 6.4326486 2.4081685  
H -0.1045684 8.0574790 3.8512212  
H 1.0413315 8.4708866 2.5488749  
H -0.2116571 5.1249159 4.1051928  
H 0.7386278 6.3463529 1.4541713  
H -0.8763402 6.4819375 2.1872503  
H 0.6928678 4.3149992 2.8052358  
H 4.0688233 6.9089249 5.6442428  
C 4.0627729 12.2916138 5.8596956  
H 4.0151566 12.1444195 4.7733020  
H 4.4660944 13.2931104 6.0634752  
H 3.0209562 12.2558712 6.2069317  
N 3.7070027 4.7333288 6.8315255  
H 2.5820138 3.0079695 7.2357270  
H 3.3901450 3.7259774 8.6423721  
C 3.5099659 3.4927230 7.5744937  
C 4.6541668 4.9959364 6.0968003  
H 4.3430874 2.7815646 7.4578664  
O 5.6462739 5.0204728 5.4365497

**Int\_d'**  
P 2.5521587 0.1429305 1.0425519  
P -2.7018248 -0.1184573 -0.3255291  
Mg -0.1387506 0.7300531 0.2771696  
O 0.3528110 1.8032341 -1.4177914  
N 0.1051430 -1.2923283 -0.0701756  
C -1.1724730 -4.4150909 -1.4191715  
H -0.7870331 -5.4092040 -1.6640723  
C 1.0764257 -3.3619901 -0.5292472

C -2.5231849 -4.1245757 -1.6511550  
C -0.8550638 -2.1411106 -0.5751671  
C 4.2589977 0.7783234 0.5894365  
H 5.0062097 0.0730642 0.9945662  
C 1.2140231 -0.7771917 4.9174102  
H 0.2783327 -1.2724573 5.2246359  
H 1.1783877 0.2495136 5.3228090  
C 2.5933769 -0.0490047 2.9197109  
H 2.5952453 0.9920621 3.2912382  
C 2.1702453 -4.2401105 -0.5747613  
H 2.0456989 -5.2610263 -0.9475653  
C 1.2806231 -0.7019622 3.3865428  
H 0.4186484 -0.1323147 3.0059533  
H 1.2077194 -1.7171831 2.9595150  
C -0.3230720 -3.4362443 -0.8816797  
C 2.5295355 -1.5893157 0.4156345  
C 1.2695104 -2.0288855 -0.0396338  
C 3.5931598 -2.4942690 0.3469736  
H 4.5880215 -2.1839847 0.6787780  
C -3.4532835 -5.1638095 -2.2316068  
H -4.2745328 -5.4047055 -1.5375229  
H -2.9181832 -6.0984250 -2.4510688  
H -3.9155079 -4.8148492 -3.1689368  
C 4.5014315 2.1616366 1.2162349  
H 3.7000454 2.8521055 0.8941265  
H 4.4378455 2.1054583 2.3138918  
C -2.2154384 -1.8361170 -0.7861978  
C 3.4332024 -3.8137993 -0.1442744  
C -3.9747089 0.3354699 -1.6254045  
H -4.6986612 -0.4980245 -1.6760350  
C 3.8088290 -0.7895001 3.4907660  
H 3.8360832 -1.8105000 3.0724673  
H 4.7462564 -0.2949561 3.1900028  
C -3.6712141 -0.3051745 1.2801081  
H -3.9957062 0.7269740 1.5094899  
C 3.7370430 -0.8694268 5.0245761  
H 4.6038671 -1.4317430 5.4082324  
H 3.8099196 0.1506096 5.4429367  
C 2.4276887 -1.5141616 5.4947326  
H 2.3818368 -1.5268365 6.5955618  
H 2.4038372 -2.5682161 5.1634460  
C -3.0243939 -2.8386124 -1.3309186  
H -4.0817594 -2.6360912 -1.5235737  
C 4.6235319 -4.7430042 -0.1861780  
H 5.4396328 -4.3286154 -0.7996833  
H 4.3504076 -5.7200843 -0.6089238  
H 5.0353876 -4.9181733 0.8208342  
C 0.7402888 1.1378695 -2.6551588  
H -0.0916532 0.4806132 -2.9380910  
H 1.6391166 0.5249864 -2.4729366  
C 4.4176896 0.8267791 -0.9388183  
H 4.2780622 -0.1786738 -1.3657718  
H 3.6176906 1.4619605 -1.3583430  
C -4.9023144 -1.2173397 1.2054531  
H -4.5798647 -2.2265328 0.8970496  
H -5.6084722 -0.8587887 0.4391568  
C -2.7071582 -0.7500988 2.3950094  
H -2.2718999 -1.7292555 2.1289546  
H -1.8755950 -0.0320783 2.4722960  
C -3.4232589 -0.8568652 3.7474872  
H -3.7406068 0.1517904 4.0669200  
H -2.7162923 -1.2190447 4.5115805  
C -3.2952918 0.4658093 -2.9985706  
H -2.5260301 1.2575943 -2.9402475  
H -2.7729279 -0.4700628 -3.2532538  
C 5.8617008 2.7368459 0.7981631  
H 5.9899251 3.7416883 1.2314059  
H 6.6647572 2.1062004 1.2198097

C -5.6109808 -1.3090686 2.5660826  
H -6.0171175 -0.3162814 2.8315858  
H -6.4724177 -1.9923722 2.4919848  
C -4.6497147 -1.7731062 3.6674598  
H -4.3189228 -2.8042036 3.4472528  
H -5.1679667 -1.8074188 4.6391609  
C -4.7350791 1.6196013 -1.2635929  
H -5.2516755 1.5046290 -0.2975505  
H -4.0254732 2.4541150 -1.1406812  
C 5.7788712 1.4033829 -1.3485122  
H 6.5781211 0.7162953 -1.0174802  
H 5.8464131 1.4570045 -2.4471893  
C -5.7556628 1.9816461 -2.3529816  
H -6.2541019 2.9277813 -2.0887948  
H -6.5415311 1.2050184 -2.3862194  
C 1.0505952 3.0925621 -1.3228070  
H 0.3020773 3.8380254 -1.0279171  
H 1.8097120 3.0134933 -0.5287557  
C 6.0087927 2.7859911 -0.7269571  
H 7.0024473 3.1717753 -1.0046515  
H 5.2685906 3.4969272 -1.1391033  
C -5.0965755 2.0954645 -3.7330462  
H -4.4055022 2.9558944 -3.7300046  
H -5.8561454 2.3046980 -4.5028473  
C -4.3146184 0.8246763 -4.0891376  
H -5.0190369 -0.0172455 -4.2120152  
H -3.7997635 0.9473813 -5.0558078  
C 1.0078487 2.2855512 -3.6160714  
H 1.6534521 1.9834349 -4.4509040  
H 0.0610304 2.6626256 -4.0274319  
C 1.6691254 3.3396739 -2.7063028  
H 2.7578019 3.1881299 -2.6750959  
H 1.4840727 4.3640994 -2.8384602  
H 1.1948247 3.0543202 2.1842670  
C 0.2467844 2.6379726 2.5797066  
O -0.4911603 1.9574571 1.7306850  
N -0.0020451 2.8980388 3.8205478  
C -1.2442001 2.3515175 4.3629237  
H -1.0952023 1.3179760 4.7243396  
H -2.0673455 2.3151293 3.6279830  
H -1.5595420 2.9551666 5.2269861  
H -0.3384652 6.5636702 1.8571373  
C -1.2594080 5.9702382 1.9448679  
H -1.8011687 6.3170826 2.8374480  
H -0.9800495 4.9223493 2.0979216  
H -1.3324292 8.1143899 0.2376644  
C -2.1125651 6.1610161 0.7006868  
C -2.3137701 7.6502020 0.4077876  
H -2.7951262 8.1607158 1.2532388  
O -1.3930402 5.6057546 -0.4611422  
H -3.3171695 4.2082659 2.5454889  
H -2.4789421 3.4311517 1.1849979  
C -3.3630708 4.0229938 1.4634408  
H -2.9276407 7.8036133 -0.4915839  
C -3.4566501 5.3388243 0.6885133  
H -4.5788713 6.4701900 2.1579302  
B -2.3444264 5.0588859 -1.3029178  
H -1.8619031 3.4539358 -2.7264450  
C -4.6882932 6.1236575 1.1197756  
C -2.0220437 4.5441983 -2.7485993  
H -1.1163265 5.0071742 -3.1633181  
H -4.2613134 3.4257066 1.2556369  
O -3.6035937 4.9932932 -0.7369751  
H -4.8627683 6.9933464 0.4746471  
H -5.5735869 5.4741713 1.0689403  
H -2.8592913 4.7261943 -3.4373266
